# Supplementary material for: Ruthenium- and palladium-catalyzed consecutive coupling and cyclization of aromatic sulfoximines with phenylboronic acids: an efficient route to dibenzothiazines
Source: Royal Society of Chemistry journal article supplement (doi:10.1039/c5cc04589d), 2015-01-01

**Ruthenium-and Palladium-Catalyzed Consecutive Coupling and  
Cyclization of Aromatic Sulfoximines with Phenylboronic Acids: an  
efficient Route to Dibenzothiazines**

Ravi Kiran Chinnagolla, Arjun Vijeta and Masilamani Jeganmohan\*

*Department of Chemistry, Indian Institute of Science Education and Research, Pune 411008,  
India*

*Email: mjeganmohan@iiserpune.ac.in*

**Electronic Supplementary Information (ESI)**

**Table of Contents**

|           |                                                                             |
|-----------|-----------------------------------------------------------------------------|
| S2        | Experimental Section                                                        |
| S3 –S4    | X-ray Analysis                                                              |
| S5        | Optimization Studies                                                        |
| S6 – S24  | Spectral Data of all Compounds                                              |
| S25 – S40 | Copies of HPLC and <sup>1</sup> H NMR Spectra of enantioselective Compounds |
| S41 – S71 | Copies of <sup>1</sup> H and <sup>13</sup> C NMR Spectra of All Compounds   |

## Experimental Section

### Procedure A: General procedure for the coupling of sulfoximine **1** with aromaticboronic acids **2** catalyzed by ruthenium complex.

A 15-mL pressure tube equipped with a magnetic stirrer and septum containing sulfoximine (**1**) (100 mg, if it is solid), [ $\{\text{RuCl}_2(p\text{-cymene})\}_2$ ] (10 mol %),  $\text{Ag}_2\text{O}$  (1.5 equiv) and boronic acid (**2a**) (3.0 equiv) was evacuated and purged with nitrogen gas three times. Then, to the tube was then added  $\text{AgSbF}_6$  (40 mol %) inside the glove box ( $\text{AgSbF}_6$  was moisture sensitive, thus, it was added inside the glove box). Later, sulfoximine (**1a**) (100 mg, if it is liquid along with solvent via syringes) and dry THF (3.0 mL) were added via syringes. Then, the pressure tube was covered with a screw cap and the reaction mixture was allowed to stir at 100 °C for 16 h. After cooling to ambient temperature, the reaction mixture was diluted with  $\text{CH}_2\text{Cl}_2$ , filtered through Celite and silica gel, and the filtrate was concentrated. The crude residue was purified through a silica gel column using hexanes and ethyl acetate as eluent to give pure **5**.

**Note:** Dry THF solvent is crucial for the reaction. If the solvent is not dry, the yield of product is decreased. This reaction requires inert condition ( $\text{N}_2$  gas).

### Procedure B. General procedure for the synthesis of dibenzothiazines catalysed by palladium catalyst.

A Schlenk tube (25 mL) equipped with a stir bar was loaded with *ortho*-aryl sulfoximine (**5**) (100 mg),  $\text{Pd}(\text{OAc})_2$  (10 mol %) and  $\text{PhI}(\text{OAc})_2$  (2.0 equiv). Then, dry toluene (2.0 mL) was added, and the mixture was allowed to stir at 120 °C for 10 h. After cooling to room temperature, the mixture was filtered through a short celite pad and washed with dichloromethane ( $3 \times 20$  mL). The filtrate was concentrated, and the product was purified by column chromatography using silica gel as stationary phase and a mixture of hexane and ethyl acetate as eluent to give pure **6**.

## X-ray Analysis

### 8-Chloro-4-(4-Chlorophenyl)-5-methyldibenzo[*c,e*][1,2]thiazine 5-oxide (6f).

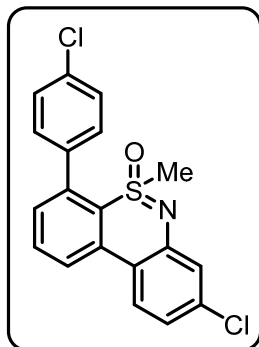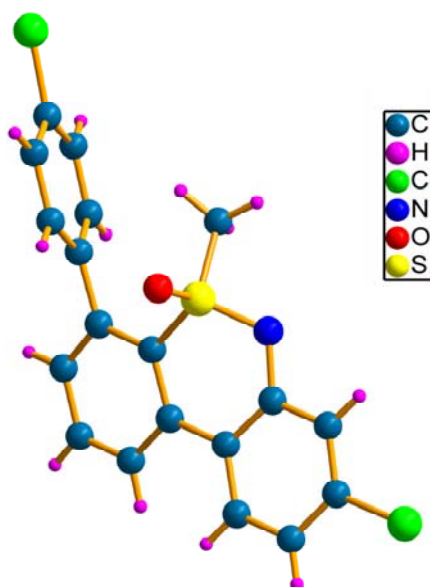

**Table 1. Crystal data and structure refinement for (6f).**

|                                 |                                                       |                 |
|---------------------------------|-------------------------------------------------------|-----------------|
| Identification code             | RK-855                                                |                 |
| Empirical formula               | C <sub>19</sub> H <sub>13</sub> Cl <sub>2</sub> N O S |                 |
| Formula weight                  | 374.26                                                |                 |
| Temperature                     | 298(2) K                                              |                 |
| Wavelength                      | 0.71073 Å                                             |                 |
| Crystal system                  | Triclinic                                             |                 |
| Space group                     | P-1                                                   |                 |
| Unit cell dimensions            | a = 7.960(2) Å                                        | ∠ = 89.003(6)°. |
|                                 | b = 9.715(3) Å                                        | ∠ = 75.173(7)°. |
|                                 | c = 11.230(3) Å                                       | ∠ = 82.452(6)°. |
| Volume                          | 832.1(4) Å <sup>3</sup>                               |                 |
| Z                               | 2                                                     |                 |
| Density (calculated)            | 1.494 Mg/m <sup>3</sup>                               |                 |
| Absorption coefficient          | 0.521 mm <sup>-1</sup>                                |                 |
| F(000)                          | 384                                                   |                 |
| Crystal size                    | 0.400 x 0.350 x 0.250 mm <sup>3</sup>                 |                 |
| Theta range for data collection | 1.876 to 28.575°.                                     |                 |
| Index ranges                    | -10 ≤ h ≤ 8, -12 ≤ k ≤ 13, -13 ≤ l ≤ 15               |                 |
| Reflections collected           | 14798                                                 |                 |
| Independent reflections         | 4149 [R(int) = 0.0426]                                |                 |

|                                   |                                             |
|-----------------------------------|---------------------------------------------|
| Completeness to theta = 25.242°   | 99.5 %                                      |
| Absorption correction             | Semi-empirical from equivalents             |
| Max. and min. transmission        | 0.878 and 0.812                             |
| Refinement method                 | Full-matrix least-squares on F <sup>2</sup> |
| Data / restraints / parameters    | 4149 / 0 / 218                              |
| Goodness-of-fit on F <sup>2</sup> | 0.898                                       |
| Final R indices [I>2sigma(I)]     | R1 = 0.0460, wR2 = 0.1373                   |
| R indices (all data)              | R1 = 0.0512, wR2 = 0.1493                   |
| Extinction coefficient            | n/a                                         |
| Largest diff. peak and hole       | 0.633 and -0.600 e.Å <sup>-3</sup>          |

## Optimization studies

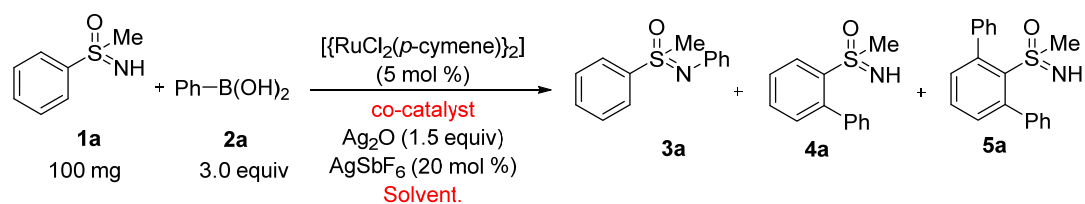

| S NO | Solvent     | Co-catalyst               | <b>3a</b> | <b>4a</b> | <b>5a</b> |
|------|-------------|---------------------------|-----------|-----------|-----------|
| 1    | THF         | $\text{Cu}(\text{OTf})_2$ | 32%       | 0%        | 15%       |
| 2    | THF         | $\text{Ag}(\text{OTf})$   | 3%        | 5%        | 20%       |
| 3    | THF         | $\text{AgOAc}$            | 0%        | 7%        | 19%       |
| 4    | THF         | $\text{Zn}(\text{OTf})_2$ | 0%        | 0%        | 0%        |
| 5    | MeOH        | --                        | 0%        | 8%        | 26%       |
| 6    | 1,4-Dioxane | --                        | 0%        | 6%        | 33%       |
| 7    | DMF         | --                        | 0%        | 5%        | 24%       |
| 8    | Toluene     | --                        | 0%        | 5%        | 10%       |

All reactions (entry 1-7) were carried out using **1a** (100 mg) with **2b** (3.0 equiv),  $[\{\text{RuCl}_2(p\text{-cymene})\}_2]$  (10 mol %),  $\text{AgSbF}_6$  (40 mol %),  $\text{Ag}_2\text{O}$  (1.5 equiv), co-catalyst (50 mol%) in Solvent (3.0 mL) at 100 °C for 16 h. All reactions (entry 1-8) isolated yields.

Furthermore, the coupling reaction was examined with solvents such as toluene, MeOH, 1,4-dioxane and DMF apart from THF. However, in all these solvents, a mixture of **4a** and **5a** was observed in moderate yields. THF solvent was effective solvent for the reaction. Furthermore, the reaction was tested with other additives such as  $\text{AgOTf}$ ,  $\text{AgBF}_4$  and  $\text{KPF}_6$  apart from  $\text{AgSbF}_6$ .  $\text{AgBF}_4$  and  $\text{AgOTf}$  were partially active, providing product **5a** in 55% and 40% yields, respectively.  $\text{KPF}_6$  was not active for the reaction. The optimization studies clearly revealed that  $[\{\text{RuCl}_2(p\text{-cymene})\}_2]$  (10 mol %),  $\text{AgSbF}_6$  (40 mol %) and  $\text{Ag}_2\text{O}$  (1.5 equiv.) in THF at 100 °C for 16 h is the best condition for the reaction. It is important to note that the C–H bond activation of both *ortho* carbons of phenyl sulfoximines were very facile and cannot be controlled. Due to the facile bis arylation, an excess amount of catalyst is required.

## Spectral Data of Compounds.

### 2'-(*S*-Methylsulfonimidoyl)-1,1':3',1''-terphenyl (**5aa**).

The representative general procedure **A** was followed using **1a** (100 mg) and phenylboronic acid (**2a**) (3.0 equiv). Product **5aa** was isolated in 135.0 mg and yield is 68%.

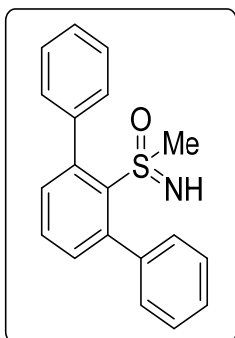

Colorless solid; mp 130-133 °C; eluent (40% ethyl acetate in hexanes).

**IR (ATR)  $\tilde{\nu}$  (cm<sup>-1</sup>):** 3564, 3524, 3065, 2876, 2354, 2367, 1743, 1698, 1648, 1540, 1518, 1424, 1218, 1017.

**<sup>1</sup>H NMR (CDCl<sub>3</sub>, 400 MHz):**  $\delta$  7.63 (bs, 4 H), 7.59 (t,  $J$  = 8.0, Hz, 2 H), 7.52 – 7.49 (m, 6 H), 7.40 (d,  $J$  = 8.0, Hz, 2 H), 2.56 (s, 3 H).

**<sup>13</sup>C NMR (CDCl<sub>3</sub>, 100 MHz):**  $\delta$  141.9, 141.4, 140.2, 132.3, 130.6, 129.8, 129.1, 128.8, 46.3.

**Elemental Analysis:** C (72.7%), H (6.0%), N (4.2%), S (9.3%).

**HRMS (ESI):** calc. for [(C<sub>19</sub>H<sub>17</sub>NOS)H] (M+H) 308.1109, measured 308.1106.

**MALDI-TOF-MS:** calc. for [(C<sub>19</sub>H<sub>17</sub>NOS)K] (M+K) 346.06, measured 346.02.

### 2''-(*S*-Methylsulfonimidoyl)-1,1':4',1''':3'',1''':4''',1''''-quinquephenyl (**5ab**).

The representative general procedure **A** was followed using **1a** (100 mg) and boronic acid **2b** (3.0 equiv). Product **5ab** was isolated in 213 mg and yield is 72%.

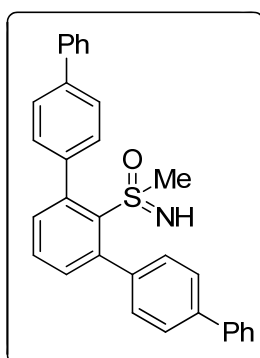

Colorless solid; mp 213-216 °C; (35% ethyl acetate in hexanes).

**IR (ATR)  $\tilde{\nu}$  (cm<sup>-1</sup>):** 3563, 3524, 3095, 2962, 2362, 2317, 1743, 1699, 1649, 1540, 1517, 1459, 1424, 1221, 1018.

**<sup>1</sup>H NMR (CDCl<sub>3</sub>, 400 MHz):**  $\delta$  7.76 (bm, 8 H), 7.69 (d,  $J$  = 8.0 Hz, 4 H), 7.58 (t,  $J$  = 8.0 Hz, 1 H), 7.50 (t,  $J$  = 8.0 Hz, 4 H), 7.43 (s, 1 H), 7.42 – 7.38 (m, 3 H), 2.59 (s, 3 H).

**<sup>13</sup>C NMR (CDCl<sub>3</sub>, 100 MHz):**  $\delta$  143.5, 141.3, 140.7, 140.1, 139.5, 132.1, 130.2, 130.0, 128.9, 127.7, 127.3, 127.1, 46.7.

**Elemental Analysis:** C (83.5%), H (6.3%), N (3.4%), S (7.1%).

**HRMS (ESI):** calc. for [(C<sub>31</sub>H<sub>25</sub>NOS)H] (M+H) 460.1735, measured 460.1731.

**MALDI-TOF-MS:** calc. for [(C<sub>31</sub>H<sub>25</sub>NOS)K] (M+K) 498.12, measured 498.08.

**4,4''-Dimethoxy-2'-(S-methylsulfonimidoyl)-1,1':3',1''-terphenyl (5ac).**

The representative general procedure **A** was followed using **1a** (100 mg) and boronic acid **2c** (3.0 equiv). Product **5ac** was isolated in 156 mg and yield is 66%.

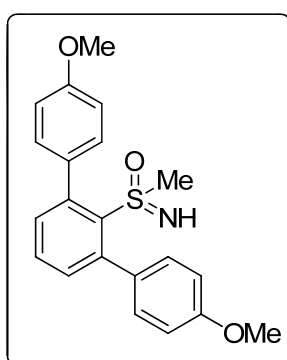

Colorless solid; mp 120-123 °C; eluent (50% ethyl acetate in hexanes).

**IR (ATR)  $\tilde{\nu}$  (cm<sup>-1</sup>):** 3562, 3525, 3000, 2936, 2360, 2317, 1743, 1699, 1648, 1540, 1513, 1457, 1248, 1029.

**<sup>1</sup>H NMR (CDCl<sub>3</sub>, 400 MHz):**  $\delta$  7.55 (t, *J* = 8.0 Hz, 1 H), 7.54 (bs, 4 H), 7.35 (d, *J* = 8.0 Hz, 2 H), 7.04 (d, *J* = 8.0 Hz, 4 H), 3.88 (s, 6 H),

2.60 (s, 3 H).

**<sup>13</sup>C NMR (CDCl<sub>3</sub>, 100 MHz):**  $\delta$  160.2, 141.2, 132.0, 131.1, 130.9, 129.4, 123.5, 114.4, 55.4, 46.0.

**Elemental Analysis:** C (70.2%), H (7.1%), N (3.6%), S (7.2%).

**HRMS (ESI):** calc. for [(C<sub>21</sub>H<sub>21</sub>NO<sub>3</sub>S)H] (M+H) 368.1320, measured 368.1314.

**MALDI-TOF-MS:** calc. for [(C<sub>21</sub>H<sub>21</sub>NO<sub>3</sub>S)K] (M+K) 406.08, measured 406.12.

**4,4''-Iodo-2'-(S-methylsulfonimidoyl)-1,1':3',1''-terphenyl (5ad).**

The representative general procedure **A** was followed using **1a** (100 mg) and boronic acid **2d** (3.0 equiv). Product **5ad** was isolated in 234 mg and yield is 65%.

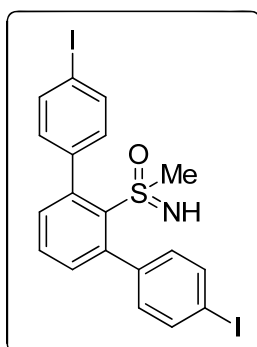

Colorless solid; mp 225-227 °C; eluent (35% ethyl acetate in hexanes).

**IR (ATR)  $\tilde{\nu}$  (cm<sup>-1</sup>):** 3565, 3523, 3054, 2927, 2367, 2314, 1741, 1693, 1646, 1540, 1515, 1484, 1424, 1264, 1217, 1004.

**<sup>1</sup>H NMR (CDCl<sub>3</sub>, 400 MHz):**  $\delta$  7.83 (d,  $J$  = 8.0 Hz, 4 H), 7.53 (t,  $J$  = 8.0 Hz, 1 H), 7.34 (d,  $J$  = 8.0 Hz, 4 H), 7.31 (d,  $J$  = 8.0 Hz, 2 H), 2.55 (s, 3 H).

**<sup>13</sup>C NMR (CDCl<sub>3</sub>, 100 MHz):**  $\delta$  142.8, 140.3, 140.0, 137.7, 132.2, 131.5, 130.3, 94.6, 46.9.

**Elemental Analysis:** C (40.8%), H (2.5%), N (2.5%), S (5.8%).

**HRMS (ESI):** calc. for [(C<sub>19</sub>H<sub>15</sub>I<sub>2</sub>NOS)H] (M+H) 559.9042, measured 559.9059.

**MALDI-TOF-MS:** calc. for [(C<sub>19</sub>H<sub>15</sub>I<sub>2</sub>NOS)K] (M+K) 597.86, measured 597.82.

#### 4,4''-Bromo-2'-(*S*-methylsulfonimidoyl)-1,1':3',1''-terphenyl (**5ae**).

The representative general procedure **A** was followed using **1a** (100 mg) and boronic acid **2e** (3.0 equiv). Product **5ae** was isolated in 185 mg and yield is 62%.

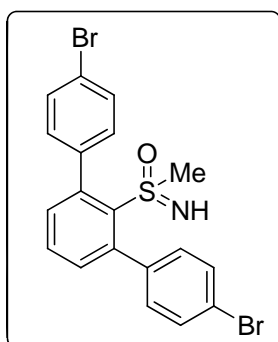

Colorless solid; mp 145-148 °C; eluent (40% ethyl acetate in hexanes).

**IR (ATR)  $\tilde{\nu}$  (cm<sup>-1</sup>):** 3564, 3525, 3056, 2925, 2367, 2315, 1741, 1700, 1648, 1540, 1518, 1418, 1220, 1009.

**<sup>1</sup>H NMR (CDCl<sub>3</sub>, 400 MHz):**  $\delta$  7.63 (d,  $J$  = 8.0 Hz, 4 H), 7.54 (t,  $J$  = 8.0 Hz, 1 H), 7.48 (d,  $J$  = 8.0 Hz, 4 H), 7.32 (d,  $J$  = 8.0 Hz, 2 H), 2.55 (s, 3 H).

**<sup>13</sup>C NMR (CDCl<sub>3</sub>, 100 MHz):**  $\delta$  143.0, 140.2, 139.4, 132.3, 131.8, 131.3, 130.3, 122.9, 46.7.

**Elemental Analysis:** C (47.2%), H (3.4%), N (3.1%), S (6.3%).

**HRMS (ESI):** calc. for [(C<sub>19</sub>H<sub>15</sub>Br<sub>2</sub>NOS)H] (M+H) 463.9319, measured 463.9321.

**MALDI-TOF-MS:** calc. for [(C<sub>19</sub>H<sub>15</sub>Br<sub>2</sub>NOS)K] (M+K) 501.88, measured 501.85.



#### 4,4''-Dichloro-2'-(*S*-methylsulfonimidoyl)-1,1':3',1''-terphenyl (**5af**).

The representative general procedure **A** was followed using **1a** (100 mg) and boronic acid **2f** (3.0 equiv). Product **5af** was isolated in 154 mg and yield is 64%.

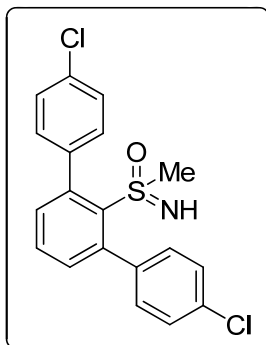

Colorless solid; mp 125-128 °C; eluent (40% ethyl acetate in hexanes).

**IR (ATR)  $\tilde{\nu}$  (cm<sup>-1</sup>):** 3565, 2962, 2962, 2367, 1723, 1647, 1493, 1452, 1279, 1125, 1077, 1013.

**<sup>1</sup>H NMR (CDCl<sub>3</sub>, 400 MHz):**  $\delta$  7.55 (d,  $J$  = 8.0 Hz, 4 H), 7.54 (t,  $J$  = 8.0 Hz, 1 H), 7.47 (d,  $J$  = 8.0 Hz, 4 H), 7.32 (d,  $J$  = 8.0 Hz, 2 H), 2.55 (s, 3 H).

**<sup>13</sup>C NMR (CDCl<sub>3</sub>, 100 MHz):**  $\delta$  143.1, 140.1, 138.9, 134.8, 132.4, 131.0, 130.3, 128.8, 46.8.

**HRMS (ESI):** calc. for [(C<sub>19</sub>H<sub>15</sub>Cl<sub>2</sub>NOS)H] (M+H) 376.0330, measured 376.0331.

**MALDI-TOF-MS:** calc. for [(C<sub>19</sub>H<sub>15</sub>Cl<sub>2</sub>NOS)K] (M+K) 413.98, measured 413.94.

#### 4,4''-Difluoro-2'-(*S*-methylsulfonimidoyl)-1,1':3',1''-terphenyl (**5ag**).

The representative general procedure **A** was followed using **1a** (100 mg) and boronic acid **2g** (3.0 equiv). Product **5ag** was isolated in 132 mg and yield is 60%.

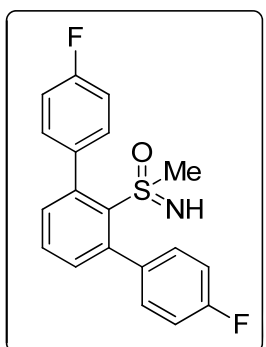

Colorless solid; mp 150-153 °C; eluent (40% ethyl acetate in hexanes).

**IR (ATR)  $\tilde{\nu}$  (cm<sup>-1</sup>):** 3565, 3523, 3059, 2927, 2365, 1740, 1693, 1647, 1510, 1451, 1416, 1221, 1044.

**<sup>1</sup>H NMR (CDCl<sub>3</sub>, 400 MHz):**  $\delta$  7.59 (bs, 4 H), 7.53 (t,  $J$  = 8.0, Hz 1 H), 7.33 (d,  $J$  = 8.0 Hz, 2 H), 7.20 (t,  $J$  = 8.0 Hz, 4 H), 2.52 (s, 3 H).

**<sup>13</sup>C NMR (CDCl<sub>3</sub>, 100 MHz):**  $\delta$  164.1, 161.6 (F-coupling), 143.3, 140.1, 136.45 and 136.42 (F-coupling), 132.4, 131.5 and 131.4 (F-coupling), 130.1, 115.8 and 115.6 (F-coupling), 46.7.

**HRMS (ESI):** calc. for [(C<sub>19</sub>H<sub>15</sub>F<sub>2</sub>NOS)H] (M+H) 344.0921, measured 344.0927.

**MALDI-TOF-MS:** calc. for [(C<sub>19</sub>H<sub>15</sub>F<sub>2</sub>NOS)K] (M+K) 382.04, measured 382.01.

**3,3''-Dibromo-2'-(S-methylsulfonimidoyl)-1,1':3',1''-terphenyl (5ah).**

The representative general procedure A was followed using **1a** (100 mg) and boronic acid **2h** (3.0 equiv). Product **5ah** was isolated in 56 mg and yield is 19%.

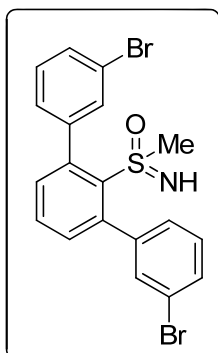

Colorless solid; mp 146-149 °C; eluent (40% ethyl acetate in hexanes).

**IR (ATR)  $\tilde{\nu}$  (cm<sup>-1</sup>):** 3563, 3525, 3060, 2922, 2361, 2317, 1741, 1699, 1648, 1553, 1518, 1456, 1218, 1042.

**<sup>1</sup>H NMR (CDCl<sub>3</sub>, 400 MHz):**  $\delta$  7.73 (bs, 1 H), 7.61 – 7.53 (m, 6 H), 7.38 – 7.33 (m, 4 H), 2.59 (s, 3 H).

**HRMS (ESI):** calc. for [(C<sub>19</sub>H<sub>15</sub>Br<sub>2</sub>NOS)H] (M+H) 463.9319, measured 463.9321.

**MALDI-TOF-MS:** calc. for [(C<sub>19</sub>H<sub>15</sub>Br<sub>2</sub>NOS)K] (M+K) 501.88, measured 501.84.

**5,5'-(2-(S-Methylsulfonimidoyl)-1,3-phenylene)bis(benzo[d][1,3]dioxole) (5ai).**

The representative general procedure A was followed using **1a** (100 mg) and boronic acid **2i** (3.0 equiv). Product **5ai** was isolated in 155 mg and yield is 61%.

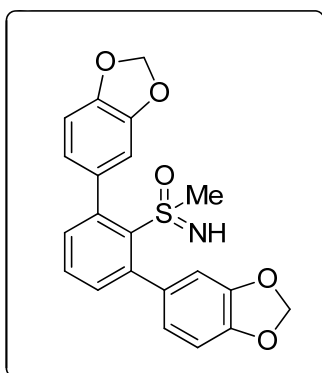

Colorless solid; mp 165-168 °C; eluent (50% ethyl acetate in hexanes).

**IR (ATR)  $\tilde{\nu}$  (cm<sup>-1</sup>):** 3564, 3524, 3059, 2923, 2363, 2321, 1742, 1700, 1649, 1540, 1516, 1459, 1264, 1037.

**<sup>1</sup>H NMR (CDCl<sub>3</sub>, 400 MHz):**  $\delta$  7.59 (t, *J* = 8.0 Hz, 1 H), 7.37 (d, *J* = 8.0, 4.0 Hz, 2 H), 7.08 (bs, 4 H), 6.95 (d, *J* = 8.0 Hz, 2 H), 6.09 (s, 4 H), 2.68 (s, 3 H).

**<sup>13</sup>C NMR (CDCl<sub>3</sub>, 100 MHz):** δ 148.6, 148.2, 145.3, 141.4, 132.9, 132.3, 131.1, 129.4, 123.5, 108.7, 101.7, 43.8.

**HRMS (ESI):** calc. for [(C<sub>21</sub>H<sub>17</sub>NO<sub>5</sub>S)H] (M+H) 396.0906, measured 396.0903.

**MALDI-TOF-MS:** calc. for [(C<sub>21</sub>H<sub>17</sub>NO<sub>5</sub>S)K] (M+K) 434.04, measured 434.06.

### 2,2'-(2-(*S*-Methylsulfonimidoyl)-1,3-phenylene)dinaphthalene (**5aj**).

The representative general procedure A was followed using **1a** (100 mg) and boronic acid **2j** (3.0 equiv). Product **5aj** was isolated in 168 mg and yield is 64%.

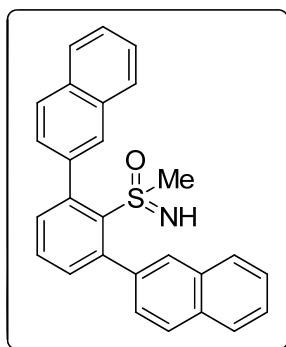

Colorless solid; mp 85-88 °C; eluent (30% ethyl acetate in hexanes).

**IR (ATR)  $\tilde{\nu}$  (cm<sup>-1</sup>):** 3563, 3527, 3060, 2925, 2358, 2321, 1742, 1699, 1648, 1540, 1516, 1459, 1216, 1043.

**<sup>1</sup>H NMR (CDCl<sub>3</sub>, 400 MHz):** δ 8.13 (bs, 2 H), 8.01 – 7.91 (m, 6 H), 7.79 (bs, 2 H), 7.61 – 7.55 (m, 5 H), 7.47 (d, *J* = 8.0 Hz, 2 H), 2.48 (s, 3 H).

**<sup>13</sup>C NMR (CDCl<sub>3</sub>, 100 MHz):** δ 143.6, 141.2, 138.1, 137.8, 132.9, 132.9, 132.5, 129.8, 128.98, 128.9, 128.3, 127.8, 127.6, 126.8, 46.7.

**Elemental Analysis:** C (80.2%), H (5.8%), N (3.2%), S (6.5%).

**HRMS (ESI):** calc. for [(C<sub>27</sub>H<sub>21</sub>NOS)H] (M+H) 408.1422, measured 408.1419.

**MALDI-TOF-MS:** calc. for [(C<sub>27</sub>H<sub>21</sub>NOS)K] (M+K) 446.09, measured 446.06.

### 5'-Methyl-2'-(*S*-methylsulfonimidoyl)-1,1':3',1''-terphenyl (**5ba**).

The representative general procedure A was followed using **1b** (100 mg) and phenyl boronic acid (**2a**) (3.0 equiv). Product **5ba** was isolated in 135 mg and yield is 65%.

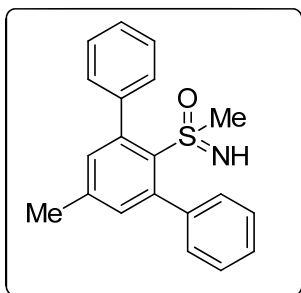

Colorless solid; mp 156-159 °C; eluent (40% ethyl acetate in hexanes).

**IR (ATR)  $\tilde{\nu}$  (cm<sup>-1</sup>):** 3564, 3523, 3062, 2923, 2364, 1741, 1706, 1646, 1547, 1516, 1462, 1221, 1049.

**<sup>1</sup>H NMR (CDCl<sub>3</sub>, 400 MHz):**  $\delta$  7.61 (bs, 4 H), 7.51 – 7.43 (m, 6 H), 7.16 (s, 2 H), 2.46 (s, 3 H), 2.43 (s, 3 H).

**<sup>13</sup>C NMR (CDCl<sub>3</sub>, 100 MHz):**  $\delta$  141.0, 140.7, 140.3, 132.7, 129.7, 128.7, 128.5, 128.3, 46.6, 20.9.

**HRMS (ESI):** calc. for [(C<sub>20</sub>H<sub>19</sub>NOS)H] (M+H) 322.1266, measured 322.1269.

**MALDI-TOF-MS:** calc. for [(C<sub>20</sub>H<sub>19</sub>NOS)K] (M+K) 360.08, measured 360.05.

#### **5'-Bromo-2'-(S-methylsulfonimidoyl)-1,1':3',1''-terphenyl (5ca).**

The representative general procedure A was followed using **1c** (100 mg) and phenyl boronic acid (**2a**) (3.0 equiv). Product **5ca** was isolated in 104 mg and yield is 63%.

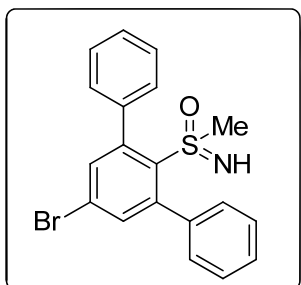

Colorless solid; mp 162-165 °C; eluent (40% ethyl acetate in hexanes).

**IR (ATR)  $\tilde{\nu}$  (cm<sup>-1</sup>):** 3564, 3526, 3056, 2928, 2356, 2325, 1741, 1701, 1647, 1542, 1515, 1455, 1218, 1045.

**<sup>1</sup>H NMR (CDCl<sub>3</sub>, 400 MHz):**  $\delta$  7.61 (bs, 4 H), 7.53 – 7.48 (m, 8 H), 2.45 (s, 3 H).

**<sup>13</sup>C NMR (CDCl<sub>3</sub>, 100 MHz):**  $\delta$  142.8, 142.6, 139.3, 134.5, 129.7, 129.0, 128.8, 124.0, 46.5.

**HRMS (ESI):** calc. for [(C<sub>19</sub>H<sub>16</sub>BrNOS)H] (M+H) 386.0214, measured 386.0218.

**MALDI-TOF-MS:** calc. for [(C<sub>19</sub>H<sub>16</sub>BrNOS)K] (M+K) 423.97, measured 423.95.

### 2'-(S-Methylsulfonimidoyl)-5'-nitro-1,1':3',1''-terphenyl (5da).

The representative general procedure A was followed using **1d** (100 mg) and phenyl boronic acid (**2a**) (3.0 equiv). Product **5da** was isolated in 95 mg and yield is 54%.

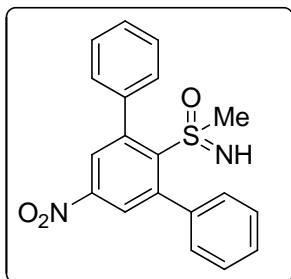

Yellow solid; mp 173-176 °C; eluent (40% ethyl acetate in hexanes).

**IR (ATR)  $\tilde{\nu}$  (cm<sup>-1</sup>):** 3565, 3525, 3065, 2924, 2356, 2320, 1744, 1697, 1647, 1543, 1515, 1459, 1217, 1040.

**<sup>1</sup>H NMR (CDCl<sub>3</sub>, 400 MHz):**  $\delta$  8.20 (s, 2 H), 7.66 (bs, 4 H), 7.58 – 7.55 (m, 6 H), 2.48 (s, 3 H).

**<sup>13</sup>C NMR (CDCl<sub>3</sub>, 100 MHz):**  $\delta$  148.9, 146.9, 142.9, 138.7, 129.7, 129.6, 129.1, 126.2, 46.3.

**HRMS (ESI):** calc. for [(C<sub>19</sub>H<sub>16</sub>N<sub>2</sub>O<sub>3</sub>S)H] (M+H) 353.0960, measured 353.0974.

**MALDI-TOF-MS:** calc. for [(C<sub>19</sub>H<sub>16</sub>N<sub>2</sub>O<sub>3</sub>S)K] (M+K) 391.05, measured 391.03.

### 5'-Chloro-4,4''-dimethoxy-2'-(S-methylsulfonimidoyl)-1,1':3',1''-terphenyl (5ec).

The representative general procedure A was followed using **1e** (100 mg) and boronic acid **2c** (3.0 equiv). Product **5ec** was isolated in 127 mg and yield is 60%.

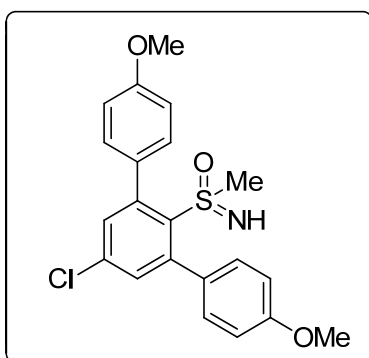

Colorless solid; 153-156 °C; eluent (50% ethyl acetate in hexanes).

**IR (ATR)  $\tilde{\nu}$  (cm<sup>-1</sup>):** 3565, 3523, 3055, 2938, 2364, 1741, 1706, 1646, 1548, 1512, 1462, 1217, 1030.

**<sup>1</sup>H NMR (CDCl<sub>3</sub>, 400 MHz):**  $\delta$  7.54 (bs, 4 H), 7.31 (s, 2 H), 7.03 (d, *J* = 8.0 Hz, 4 H), 3.88 (s, 6 H), 2.48 (s, 3 H).

**<sup>13</sup>C NMR (CDCl<sub>3</sub>, 100 MHz):**  $\delta$  160.2, 142.5, 142.3, 135.5, 131.6, 131.3, 130.9, 114.3, 55.4, 46.5.

**HRMS (ESI):** calc. for [(C<sub>21</sub>H<sub>20</sub>ClNO<sub>3</sub>S)H] (M+H) 402.0931, measured 402.0930.

**MALDI-TOF-MS:** calc. for [(C<sub>21</sub>H<sub>20</sub>ClNO<sub>3</sub>S)K] (M+K) 440.04, measured 440.01.

### 5'-Fluoro-4,4''-dimethoxy-2'-(*S*-methylsulfonimidoyl)-1,1':3',1''-terphenyl (**5fc**).

The representative general procedure **A** was followed using **1f** (100 mg) and boronic acid **2c** (3.0 equiv). Product **5fc** was isolated in 140 mg and yield is 63%.

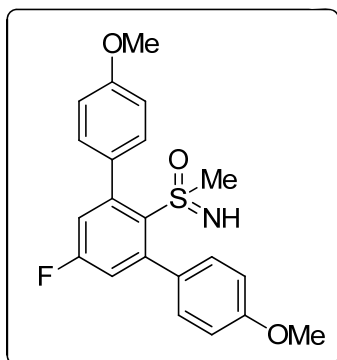

Colorless solid; 133-136 °C; eluent (50% ethyl acetate in hexanes).

**IR (ATR)  $\tilde{\nu}$  (cm<sup>-1</sup>):** 3564, 3525, 3062, 2939, 2360, 2321, 1743, 1699, 1648, 1540, 1513, 1460, 1215, 1078.

**<sup>1</sup>H NMR (CDCl<sub>3</sub>, 400 MHz):**  $\delta$  7.55 (bd,  $J$  = 8.0 Hz, 4 H), 7.04 (d,  $J$  = 8.0 Hz, 4 H), 7.03 (d,  $J$  = 8.0 Hz, 2 H), 7.88 (s, 6 H), 2.51 (s, 3 H).

**<sup>13</sup>C NMR (CDCl<sub>3</sub>, 100 MHz):**  $\delta$  163.0, 160.5 and 160.3 (C-F coupling), 144.0, 143.9 (C-F coupling), 139.6, 131.7, 130.8, 118.5 and 118.2 (C-F coupling), 114.3, 55.4, 46.6.

**Elemental Analysis:** C (66.3%), H (5.5%), N (3.2%), S (7.7%).

**HRMS (ESI):** calc. for [(C<sub>21</sub>H<sub>20</sub>FNO<sub>3</sub>S)H] (M+H) 386.1226, measured 386.1227.

**MALDI-TOF-MS:** calc. for [(C<sub>21</sub>H<sub>20</sub>FNO<sub>3</sub>S)K] (M+K) 424.07, measured 424.02.

### 2'-(Ethylsulfonimidoyl)-1,1':3',1''-terphenyl (**5ga**).

The representative general procedure **A** was followed using **1g** (100 mg) and phenyl boronic acid (**2a**) (3.0 equiv). Product **5ga** was isolated in 135 mg and yield is 71%.

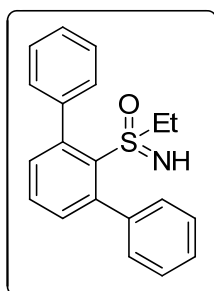

Colorless solid; 152-155 °C; (40% ethyl acetate in hexanes).

**IR (ATR)  $\tilde{\nu}$  (cm<sup>-1</sup>):** 3565, 3523, 3057, 2925, 2362, 2322, 1740, 1693, 1646, 1546, 1516, 1452, 1208, 1052.

**<sup>1</sup>H NMR (CDCl<sub>3</sub>, 400 MHz):** δ 7.61 (bs, 4 H), 7.55 – 7.43 (m, 7 H), 7.34 (d, *J* = 8.0 Hz, 2 H), 2.55 – 2.48 (m, 1 H), 2.45 – 2.38 (m, 1 H), 0.93 (d, *J* = 8.0 Hz, 3 H).

**<sup>13</sup>C NMR (CDCl<sub>3</sub>, 100 MHz):** δ 141.9, 140.6, 132.3, 130.0, 129.7, 129.6, 128.4, 128.3, 50.5, 8.5.

**HRMS (ESI):** calc. for [(C<sub>20</sub>H<sub>19</sub>NOS)H] (M+H) 322.1266, measured 322.1269.

**MALDI-TOF-MS:** calc. for [(C<sub>20</sub>H<sub>19</sub>NOS)K] (M+K) 360.08, measured 360.03.

### 3-Methyl-2-(*S*-methylsulfonimidoyl)-1,1'-biphenyl (**5ha**).

The representative general procedure **A** was followed using **1h** (100 mg) and phenyl boronic acid (**2a**) (3.0 equiv). Product **5ha** was isolated in 133 mg and yield is 70%.

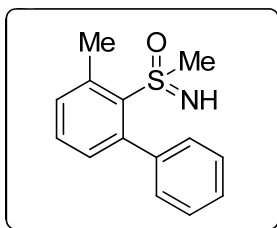

Colorless solid; 91-94 °C; (50% ethyl acetate in hexanes).

**IR (ATR)  $\tilde{\nu}$  (cm<sup>-1</sup>):** 3565, 3524, 3056, 2932, 2363, 2323, 1741, 1706, 1646, 1546, 1515, 1453, 1217, 1047.

**<sup>1</sup>H NMR (CDCl<sub>3</sub>, 400 MHz):** δ 7.42 – 7.38 (m, 5 H), 7.35 (d, *J* = 8.0 Hz, 2 H), 7.13 (d, *J* = 8.0 Hz, 1 H), 2.94 (s, 3 H), 2.87 (s, 3 H).

**<sup>13</sup>C NMR (CDCl<sub>3</sub>, 100 MHz):** δ 141.8, 141.1, 138.2, 132.8, 131.0, 130.6, 129.1, 128.6, 128.2, 127.7, 46.7, 22.9.

**HRMS (ESI):** calc. for [(C<sub>14</sub>H<sub>15</sub>NOS)H] (M+H) 246.0952, measured 246.0950.

**MALDI-TOF-MS:** calc. for [(C<sub>14</sub>H<sub>15</sub>NOS)K] (M+K) 284.05, measured 284.02.

### 4'-Chloro-3-methyl-2-(*S*-methylsulfonimidoyl)-1,1'-biphenyl (**5he**).

The representative general procedure **A** was followed using **1h** (100 mg) and boronic acid **2e** (3.0 equiv). Product **5he** was isolated in 138 mg and yield is 62%.

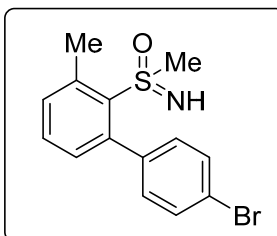

Colorless solid; 122-125 °C; (50% ethyl acetate in hexanes).

**IR (ATR)  $\tilde{\nu}$  (cm<sup>-1</sup>):** 3567, 3523, 3054, 2931, 2363, 2323, 1743, 1709, 1649, 1548, 1517, 1455, 1219, 1046.

**<sup>1</sup>H NMR (CDCl<sub>3</sub>, 400 MHz):**  $\delta$  7.54 (t,  $J$  = 8.0 Hz, 2 H), 7.43 (t,  $J$  = 8.0 Hz, 1 H), 7.36 (d,  $J$  = 8.0 Hz, 1 H), 7.24 – 7.19 (m, 2 H), 7.10 (d,  $J$  = 8.0 Hz, 1 H), 3.03 (s, 3 H), 2.86 (s, 3 H).

**<sup>13</sup>C NMR (CDCl<sub>3</sub>, 100 MHz):**  $\delta$  141.6, 139.1, 138.3, 134.0, 133.6, 131.9, 131.4, 130.2, 128.5, 128.2, 46.4, 22.9.

**HRMS (ESI):** calc. for [(C<sub>14</sub>H<sub>14</sub>BrNOS)H] (M+H) 324.0058, measured 324.0061.

**MALDI-TOF-MS:** calc. for [(C<sub>14</sub>H<sub>14</sub>BrNOS)K] (M+K) 361.96, measured 361.92.

**4-Methyl-2-(S-methylsulfonimidoyl)-1,1'-biphenyl and 2-Methyl-6-(S-methylsulfonimidoyl)-1,1'-biphenyl (7.3 : 2.7) (5ia and 5ia).**

The representative general procedure A was followed using **1i** (100 mg) and phenyl boronic acid (**2a**) (3.0 equiv). Product **5ia** and **5ia** were isolated. in 118 mg and 13 mg yield is 62% and yield is 7%.

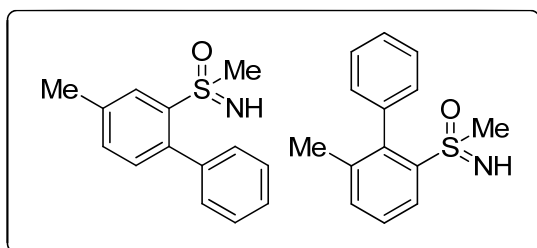

Colorless semisolid; (45% ethyl acetate in hexanes).

**IR (ATR)  $\tilde{\nu}$  (cm<sup>-1</sup>):** 3563, 3524, 3016, 2922, 2360, 1742, 1699, 1647, 1541, 1517, 1475, 1256, 1018.

**<sup>1</sup>H NMR (CDCl<sub>3</sub>, 400 MHz):**  $\delta$  8.07 (d,  $J$  = 8.0 Hz, 0.76 H), 7.59 (d,  $J$  = 8.0 Hz, 0.76 H), 7.46 – 7.31 (m, 8 H), 7.46 – 7.31 (m, 1.14 H), 7.20 (d,  $J$  = 8.0 Hz, 0.38 H), 3.20 (s, 1.21 H), 2.72 (s, 3 H), 2.51 (s, 1.16 H), 2.44 (s, 3 H).

**<sup>13</sup>C NMR (CDCl<sub>3</sub>, 100 MHz):**  $\delta$  144.8, 139.9, 139.7, 139.5, 136.7, 136.2, 133.6, 132.6, 132.1, 130.2, 130.2, 129.8, 129.5, 129.2, 129.1, 128.4, 128.0, 127.8, 123.8, 120.6, 43.6, 43.1, 21.4, 21.0.

**HRMS (ESI):** calc. for [(C<sub>14</sub>H<sub>15</sub>NOS)H] (M+H) 246.0952, measured 246.0951.

**MALDI-TOF-MS:** calc. for [(C<sub>14</sub>H<sub>15</sub>NOS)K] (M+K) 284.05, measured 284.02.



### 5-Methyl-4-phenyldibenzo[c,e][1,2]thiazine 5-oxide (6a).

The representative general procedure **B** was followed using **5aa** (100 mg). Product **6a** was isolated in 76 mg and yield is 76%.

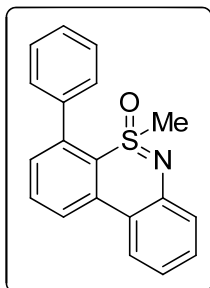

Colorless solid; 170-173 °C; eluent (20% ethyl acetate in hexanes).

**IR (ATR)  $\tilde{\nu}$  (cm<sup>-1</sup>):** 3058, 2926, 1706, 1647, 1578, 1456, 1313, 1269, 1204, 1010.

**<sup>1</sup>H NMR (CDCl<sub>3</sub>, 400 MHz):**  $\delta$  8.24 (d, *J* = 8.0 Hz, 1 H), 8.07 (d, *J* = 8.0 Hz, 1 H), 7.88 (bs, 1 H), 7.76 (d, *J* = 8.0 Hz, 1 H), 7.55 – 7.51 (m, 3 H), 7.45 (d, *J* = 8.0 Hz, 2 H), 7.41 (d, *J* = 8.0 Hz, 1 H), 7.29 (s, 1 H), 7.14 (t, *J* = 8.0 Hz, 1 H), 2.81 (s, 3 H).

**<sup>13</sup>C NMR (CDCl<sub>3</sub>, 100 MHz):**  $\delta$  141.9, 139.0, 138.7, 134.3, 131.5, 131.2, 130.6, 129.4, 129.3, 129.0, 128.9, 128.5, 126.6, 124.6, 124.2, 124.1, 121.1, 118.7, 45.3.

**Elemental Analysis:** C (72.5%), H (5.1%), N (4.1%), S (9.2%).

**HRMS (ESI):** calc. for [(C<sub>19</sub>H<sub>15</sub>NOS)H] (M+H) 306.0953, measured 306.0951.

**MALDI-TOF-MS:** calc. for [(C<sub>19</sub>H<sub>15</sub>NOS)K] (M+K) 344.05, measured 344.00.

### 4-([1,1'-Biphenyl]-4-yl)-5-methyl-8 phenyldibenzo[c,e][1,2]thiazine 5-oxide (6b).

The representative general procedure **B** was followed using **5ab** (100 mg). Product **6b** was isolated in 84 mg and yield is 85%.

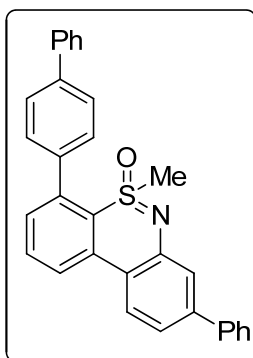

Colorless solid; 172-175 °C; (20% ethyl acetate in hexanes).

**IR (ATR)  $\tilde{\nu}$  (cm<sup>-1</sup>):** 3034, 2922, 1707, 1647, 1570, 1452, 1324, 1226, 1195, 1013.

**<sup>1</sup>H NMR (CDCl<sub>3</sub>, 400 MHz):**  $\delta$  8.28 (d, *J* = 8.0 Hz, 1 H), 8.14 (d, *J* = 8.0 Hz, 1 H), 7.81 - 7.77 (m, 3 H), 7.73 - 7.70 (m, 5 H), 7.56 (s, 1 H), 7.53 – 7.45 (m, 6 H), 7.42 – 7.36 (m, 3 H), 2.93 (s, 3 H).

**<sup>13</sup>C NMR (CDCl<sub>3</sub>, 100 MHz):** δ 143.2, 142.3, 141.6, 140.4, 139.9, 138.5, 137.9, 134.2, 131.7, 130.6, 129.8, 128.9, 128.8, 127.9, 127.6, 127.5, 127.4, 127.1, 126.4, 124.7, 124.1, 122.7, 120.1, 117.7, 45.6.

**Elemental Analysis:** C (80.3%), H (5.0%), N (3.4%), S (6.2%).

**HRMS (ESI):** calc. for [(C<sub>31</sub>H<sub>23</sub>NOS)H] (M+H) 458.1579, measured 458.1583.

**MALDI-TOF-MS:** calc. for [(C<sub>31</sub>H<sub>23</sub>NOS)K] (M+K) 496.11, measured 496.06.

### 8-Methoxy-4-(4-methoxyphenyl)-5-methyldibenzo[*c,e*][1,2]thiazine 5-oxide (**6c**).

The representative general procedure **B** was followed using **5ac** (100 mg). Product **6c** was isolated in 64 mg and yield is 65%.

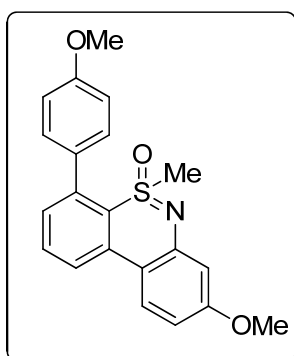

Colorless solid; 273-176 °C; eluent (40% ethyl acetate in hexanes).

**IR (ATR)  $\tilde{\nu}$  (cm<sup>-1</sup>):** 3002, 2927, 1741, 1707, 1646, 1578, 1453, 1338, 1251, 1220, 1029.

**<sup>1</sup>H NMR (CDCl<sub>3</sub>, 400 MHz):** δ 8.10 (d, *J* = 8.0 Hz, 1 H), 7.95 (d, *J* = 8.0 Hz, 1 H), 7.80 (bs, 1 H), 7.69 (t, *J* = 8.0 Hz, 1 H), 7.34 (d, *J* = 8.0 Hz, 2 H), 7.05 (d, *J* = 8.0 Hz, 2 H), 6.77 (s, 1 H), 6.73 (d, *J* = 8.0

Hz 1 H), 3.90 (s, 3 H), 3.87 (s, 3 H), 2.84 (s, 3 H).

**<sup>13</sup>C NMR (CDCl<sub>3</sub>, 100 MHz):** δ 161.6, 159.9, 143.7, 138.7, 138.6, 134.5, 132.3, 131.6, 131.2, 129.7, 125.5, 125.2, 123.2, 114.8, 112.0, 110.2, 106.7, 55.6, 45.5.

**HRMS (ESI):** calc. for [(C<sub>21</sub>H<sub>19</sub>NO<sub>3</sub>S)H] (M+H) 366.1164, measured 366.1162.

**MALDI-TOF-MS:** calc. for [(C<sub>21</sub>H<sub>19</sub>NO<sub>3</sub>S)K] (M+K) 404.07, measured 404.02.

### 8-Iodo-4-(4-iodophenyl)-5-methyldibenzo[*c,e*][1,2]thiazine 5-oxide (**6d**).

The representative general procedure **B** was followed using **5ad** (100 mg). Product **6d** was isolated in 76 mg and yield is 77%.

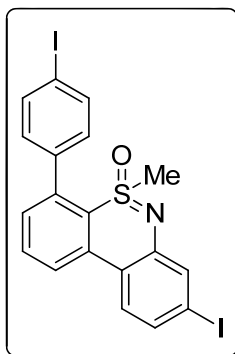

Colorless solid; 262-265 °C; eluent (20% ethyl acetate in hexanes).

**IR (ATR)  $\tilde{\nu}$  (cm<sup>-1</sup>):** 3057, 2920, 2375, 1741, 1706, 1647, 1579, 1451, 1312, 1264, 1193, 1017.

**<sup>1</sup>H NMR (CDCl<sub>3</sub>, 400 MHz):**  $\delta$  8.19 (d,  $J$  = 8.0 Hz, 1 H), 7.88 (d,  $J$  = 8.0 Hz, 2 H), 7.78 – 7.74 (m, 2 H), 7.72 (s, 1 H), 7.66 (bs, 1 H), 7.43 (t,  $J$  = 8.0 Hz, 2 H), 7.20 (s, 1 H), 2.87 (s, 3 H).

**<sup>13</sup>C NMR (CDCl<sub>3</sub>, 100 MHz):**  $\delta$  143.0, 138.3, 137.8, 134.0, 133.4, 132.9, 131.9, 131.1, 130.9, 130.1, 130.0, 126.1, 125.5, 125.4, 124.2, 118.0, 96.3, 95.2, 45.7.

**Elemental Analysis:** C (42.3%), H (2.1%), N (3.3%), S (6.1%).

**HRMS (ESI):** calc. for [(C<sub>19</sub>H<sub>13</sub>I<sub>2</sub>NOS)H] (M+H) 557.8885, measured 557.8879.

**MALDI-TOF-MS:** calc. for [(C<sub>19</sub>H<sub>13</sub>I<sub>2</sub>NOS)K] (M+K) 595.84, measured 595.80.

### 8-Bromo-4-(4-bromophenyl)-5-methyldibenzo[c,e][1,2]thiazine 5-oxide (6e).

The representative general procedure **B** was followed using **5ae** (100 mg). Product **6e** was isolated in 84 mg and yield is 85%.

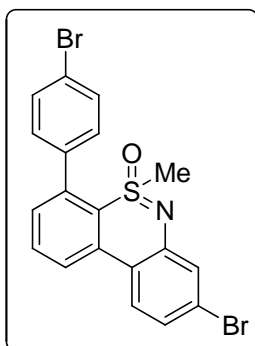

Colorless solid; 239-242 °C; eluent (20% ethyl acetate in hexanes).

**IR (ATR)  $\tilde{\nu}$  (cm<sup>-1</sup>):** 3061, 2952, 2375, 1741, 1706, 1646, 1562, 1462, 1316, 1268, 1205, 1017.

**<sup>1</sup>H NMR (CDCl<sub>3</sub>, 400 MHz):**  $\delta$  8.18 (d,  $J$  = 8.0 Hz, 1 H), 7.88 (d,  $J$  = 8.0 Hz, 1 H), 7.78 – 7.76 (m,  $J$  = 8.0 Hz, 2 H), 7.68 (d,  $J$  = 8.0 Hz, 2 H), 7.44 (s, 1 H), 7.42 (d,  $J$  = 8.0 Hz, 1 H), 7.34 (bs, 1 H), 7.24 (d,  $J$  = 8.0 Hz, 1 H), 2.87 (s, 3 H).

**<sup>13</sup>C NMR (CDCl<sub>3</sub>, 100 MHz):**  $\delta$  143.2, 137.7, 137.6, 133.9, 132.9, 132.8, 132.1, 132.3, 131.9, 130.8, 127.2, 126.0, 125.5, 124.34, 124.3, 124.2, 123.5, 117.4, 45.7.

**Elemental Analysis:** C (48.5%), H (2.8%), N (3.1%), S (7.4%).

**HRMS (ESI):** calc. for [(C<sub>19</sub>H<sub>13</sub>Br<sub>2</sub>NOS)H] (M+H) 461.9163, measured 461.9160.

**MALDI-TOF-MS:** calc. for [(C<sub>19</sub>H<sub>13</sub>Br<sub>2</sub>NOS)K] (M+K) 499.87, measured 499.82.

### 8-Chloro-4-(4-chlorophenyl)-5-methyldibenzo[c,e][1,2]thiazine 5-oxide (6f).

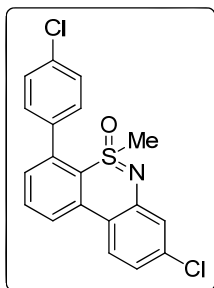

The representative general procedure **B** was followed using **5af** (100 mg).

Product **6f** was isolated in 78 mg and yield is 79%.

Colorless solid; 252-255 °C; eluent (20% ethyl acetate in hexanes).

**IR (ATR)  $\tilde{\nu}$  (cm<sup>-1</sup>):** 3062, 2949, 2375, 1742, 1699, 1649, 1541, 1457, 1315, 1272, 1206, 1021.

**<sup>1</sup>H NMR (CDCl<sub>3</sub>, 400 MHz):**  $\delta$  8.17 (d, *J* = 8.0 Hz, 1 H), 7.81 (bs, 1 H), 7.76 (t, *J* = 8.0 Hz, 2 H), 7.52 (d, *J* = 8.0 Hz, 2 H), 7.41 (d, *J* = 8.0 Hz, 2 H), 7.27 (s, 1 H), 7.08 (d, *J* = 8.0 Hz, 1 H), 2.86 (s, 3 H).

**<sup>13</sup>C NMR (CDCl<sub>3</sub>, 100 MHz):**  $\delta$  143.1, 137.7, 137.2, 136.1, 135.3, 133.9, 132.6, 131.9, 130.8, 130.6, 129.3, 128.8, 126.0, 125.3, 124.3, 124.2, 121.5, 117.0, 45.6.

**Elemental Analysis:** C (59.5%), H (3.5%), N (3.6%), S (8.6%).

**HRMS (ESI):** calc. for [(C<sub>19</sub>H<sub>13</sub>Cl<sub>2</sub>NOS)H] (M+H) 374.0173, measured 374.0168.

**MALDI-TOF-MS:** calc. for [(C<sub>19</sub>H<sub>13</sub>Cl<sub>2</sub>NOS)K] (M+K) 411.97, measured 411.92.

### 8-Fluoro-4-(4-fluorophenyl)-5-methyldibenzo[c,e][1,2]thiazine 5-oxide (6g).

The representative general procedure **B** was followed using **5ag** (100 mg). Product **6g** was isolated in 80 mg and yield is 81%.

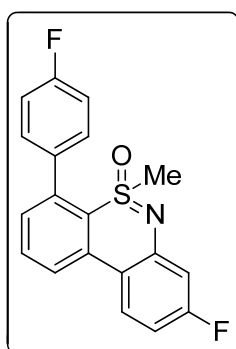

Colorless solid; 115-118 °C; eluent (20% ethyl acetate in hexanes)

**IR (ATR)  $\tilde{\nu}$  (cm<sup>-1</sup>):** 3070, 2370, 1743, 1699, 1648, 1513, 1458, 1338, 1223, 1161, 1020.

**<sup>1</sup>H NMR (CDCl<sub>3</sub>, 400 MHz):** δ 8.15 (d, *J* = 8.0 Hz 1 H), 8.01 (dd, *J* = 8.0, 4.0 Hz 1 H), 7.84 (bs, 1 H), 7.75 (t, *J* = 8.0 Hz 1 H), 7.44 (d, *J* = 8.0 Hz 1 H), 7.40 (d, *J* = 8.0 Hz 1 H), 7.23 (d, *J* = 8.0 Hz 2 H), 6.95 (d, *J* = 8.0 Hz 1 H), 6.85 (d, *J* = 8.0 Hz 1 H), 2.86 (s, 3 H).

**<sup>13</sup>C NMR (CDCl<sub>3</sub>, 100 MHz):** δ 165.4, 164.3, 162.9, 161.8, 144.0 and 143.9 (C-F coupling), 137.9, 134.8 and 134.1 (C-F coupling), 133.1, 131.8, 131.1, 130.6, 126.0 and 125.9 (C-F coupling), 125.8, 124.0, 115.7, 115.1, 110.5 and 110.3 (C-F coupling), 109.3 and 109.0 (C-F coupling), 45.5.

**Elemental Analysis:** C (67.4%), H (4.5%), N (4.3%), S (10.6%).

**HRMS (ESI):** calc. for [(C<sub>19</sub>H<sub>13</sub>F<sub>2</sub>NOS)H] (M+H) 342.0764, measured 342.0765.

**MALDI-TOF-MS:** calc. for [(C<sub>19</sub>H<sub>13</sub>F<sub>2</sub>NOS)K] (M+K) 380.03, measured 380.00.

### 2,5-Dimethyl-4-phenyldibenzo[*c,e*][1,2]thiazine 5-oxide (**6h**).

The representative general procedure **B** was followed using **5ba** (100 mg) Product **6h** was isolated in 79 mg and yield is 80%.

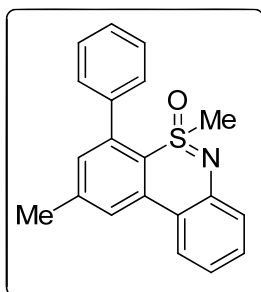

Colorless solid; 185-188 °C; eluent (20% ethyl acetate in hexanes).

**IR (ATR)  $\tilde{\nu}$  (cm<sup>-1</sup>):** 3061, 2926, 2372, 1742, 1700, 1649, 1542, 1460, 1317, 1277, 1161, 1057.

**<sup>1</sup>H NMR (CDCl<sub>3</sub>, 400 MHz):** δ 8.06 (d, *J* = 8.0 Hz 1 H), 8.03 (s, 1 H), 7.86 (bs, 1 H), 7.54 – 7.49 (m, 3 H), 7.43 – 7.38 (m, 2 H), 7.28 – 7.25 (m, 2 H), 7.12 (t, *J* = 8.0 Hz 1 H), 2.79 (s, 3 H), 2.56 (s, 3 H).

**<sup>13</sup>C NMR (CDCl<sub>3</sub>, 100 MHz):** δ 142.1, 142.0, 139.1, 138.7, 134.4, 131.9, 131.6, 131.2, 130.4, 129.3, 128.7, 128.4, 128.1, 124.5, 124.2, 124.1, 120.9, 118.7, 45.4, 21.8.

**HRMS (ESI):** calc. for [(C<sub>20</sub>H<sub>17</sub>NOS)H] (M+H) 320.1109, measured 320.1108.

**MALDI-TOF-MS:** calc. for [(C<sub>20</sub>H<sub>17</sub>NOS)K] (M+K) 358.06, measured 358.02.

## 2-Bromo-5-methyl-4-phenyldibenzo[*c,e*][1,2]thiazine 5-oxide (**6i**).

The representative general procedure **B** was followed using **5ca** (100 mg). Product **6i** was isolated in 83 mg and yield is 84%.

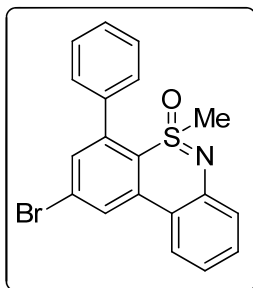

Colorless solid; 166-169 °C; eluent (20% ethyl acetate in hexanes).

**IR (ATR)  $\tilde{\nu}$  (cm<sup>-1</sup>):** 3060, 2926, 2373, 1742, 1700, 1648, 1555, 1459, 1316, 1268, 1208, 1008.

**<sup>1</sup>H NMR (CDCl<sub>3</sub>, 400 MHz):**  $\delta$  8.36 (s, 1 H), 8.00 (d, *J* = 8.0 Hz 1 H), 7.85 (bs, 1 H), 7.59 (s, 1 H), 7.54 – 7.53 (m, 3 H), 7.44 (t, *J* = 8.0 Hz, 2 H), 7.27 (d, *J* = 8.0 Hz, 1 H), 7.14 (d, *J* = 8.0 Hz, 1 H), 2.78 (s, 3 H).

**<sup>13</sup>C NMR (CDCl<sub>3</sub>, 100 MHz):**  $\delta$  142.2, 140.2, 137.7, 136.1, 133.1, 131.2, 131.1, 129.3, 129.1, 128.6, 126.9, 126.3, 125.3, 124.7, 124.3, 121.3, 117.7, 45.3.

**Elemental Analysis:** C (58.6%), H (4.3%), N (3.7%), S (8.0%).

**HRMS (ESI):** calc. for [(C<sub>19</sub>H<sub>14</sub>BrNOS)H] (M+H) 384.0058, measured 384.0060.

**MALDI-TOF-MS:** calc. for [(C<sub>19</sub>H<sub>14</sub>BrNOS)K] (M+K) 421.96, measured 421.90.

## 5-Methyl-2-nitro-4-phenyldibenzo[*c,e*][1,2]thiazine 5-oxide (**6j**).

The representative general procedure **B** was followed using **5da** (100 mg). Product **6j** was isolated in 78 mg and yield is 79%.

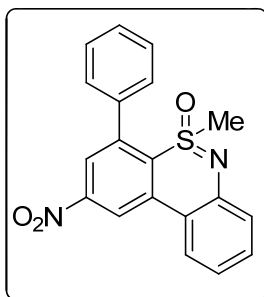

Yellow color solid; 156-159 °C; eluent (20% ethyl acetate in hexanes).

**IR (ATR)  $\tilde{\nu}$  (cm<sup>-1</sup>):** 3068, 2925, 2315, 1742, 1700, 1648, 1529, 1459, 1317, 1269, 1211, 1014.

**<sup>1</sup>H NMR (CDCl<sub>3</sub>, 400 MHz):**  $\delta$  9.07 (s, 1 H), 8.25 (s, 1 H), 8.14 (d, *J* = 8.0 Hz 1 H), 7.87 (bs, 1 H), 7.59 (s, 3 H), 7.51 (d, *J* = 8.0 Hz, 2 H), 7.32 (d, *J* = 8.0 Hz, 1 H), 7.23 (d, *J* = 8.0 Hz, 1 H), 2.83 (s, 3 H).

**<sup>13</sup>C NMR (CDCl<sub>3</sub>, 100 MHz):** δ 148.5, 142.1, 140.8, 137.2, 136.2, 131.97, 130.9, 130.0, 129.8, 129.5, 129.1, 128.9, 124.9, 124.5, 124.0, 121.9, 119.2, 118.0, 45.1.

**HRMS (ESI):** calc. for [(C<sub>19</sub>H<sub>14</sub>N<sub>2</sub>O<sub>3</sub>S)H] (M+H) 351.0803, measured 351.0804.

**MALDI-TOF-MS:** calc. for [(C<sub>19</sub>H<sub>14</sub>N<sub>2</sub>O<sub>3</sub>S)K] (M+K) 389.03, measured 389.01.

#### 5-Ethyl-4-phenyldibenzo[*c,e*][1,2]thiazine 5-oxide (6k).

The representative general procedure **B** was followed using **5ga** (100 mg). Product **6k** was isolated in 82 mg and yield is 83%.

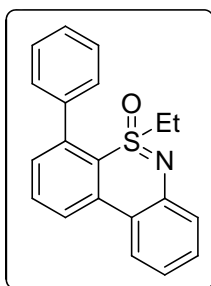

Colorless solid; 183-186 °C; eluent (20% ethyl acetate in hexanes).

**IR (ATR)  $\tilde{\nu}$  (cm<sup>-1</sup>):** 3059, 2927, 2312, 1742, 1700, 1648, 1573, 1458, 1319, 1274, 1195, 1015.

**<sup>1</sup>H NMR (CDCl<sub>3</sub>, 400 MHz):** δ 8.27 (d, *J* = 8.0 Hz, 1 H), 8.07 (d, *J* = 8.0 Hz, 1 H), 7.90 (bs, 1 H), 7.76 (t, *J* = 8.0 Hz, 1 H), 7.53 – 7.50 (m, 1 H), 7.45 – 7.40 (m, 3 H), 7.29 (d, *J* = 8.0 Hz 3 H), 7.12 (t, *J* = 8.0 Hz, 1 H), 7.15 – 7.06 (m, 1 H), 7.49 – 7.40 (m, 1 H), 7.12 (t, *J* = 8.0 Hz, 3 H),

**<sup>13</sup>C NMR (CDCl<sub>3</sub>, 100 MHz):** δ 142.6, 139.2, 138.8, 135.6, 131.7, 131.5, 130.7, 130.5, 128.8, 128.7, 128.2, 124.6, 124.1, 122.3, 120.7, 117.9, 49.7, 9.9.

**Elemental Analysis:** C (73.0%), H (5.2%), N (4.0%), S (9.4%).

**HRMS (ESI):** calc. for [(C<sub>20</sub>H<sub>17</sub>NOS)H] (M+H) 320.1109, measured 320.1107.

**MALDI-TOF-MS:** calc. for [(C<sub>20</sub>H<sub>17</sub>NOS)K] (M+K) 358.06, measured 358.01.

#### 4,5-Dimethyldibenzo[*c,e*][1,2]thiazine 5-oxide (6l).

The representative general procedure **B** was followed using **5ha** (100 mg). Product **6l** was isolated in 40 mg and yield is 41%.

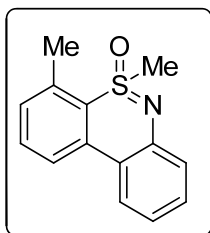

Colorless solid; 174-177 °C; eluent (35% ethyl acetate in hexanes).

**IR (ATR)  $\tilde{\nu}$  (cm<sup>-1</sup>):** 3064, 2927, 2366, 1742, 1699, 1648, 1541, 1460, 1321, 1261, 1202, 1015.

**<sup>1</sup>H NMR (CDCl<sub>3</sub>, 400 MHz):**  $\delta$  8.08 (d,  $J$  = 8.0 Hz, 1 H), 7.96 (dd,  $J$  = 8.0, 4.0 Hz, 1 H), 7.63 (t,  $J$  = 8.0 Hz, 1 H), 7.37 (d,  $J$  = 8.0 Hz, 1 H), 7.37 (t,  $J$  = 8.0 Hz, 1 H), 7.23 (d,  $J$  = 8.0 Hz, 1 H), 7.06 (t,  $J$  = 8.0 Hz, 1 H), 3.51 (s, 3 H), 2.85 (s, 3 H).

**<sup>13</sup>C NMR (CDCl<sub>3</sub>, 100 MHz):**  $\delta$  142.2, 135.5, 135.2, 132.6, 131.2, 130.5, 124.6, 124.2, 123.9, 121.9, 120.6, 117.5, 47.8, 21.0.

**HRMS (ESI):** calc. for [(C<sub>14</sub>H<sub>13</sub>NOS)H] (M+H) 244.0796, measured 244.0799.

**MALDI-TOF-MS:** calc. for [(C<sub>14</sub>H<sub>13</sub>NOS)K] (M+K) 282.03, measured 282.01.



## 5-Methyl-4-phenyldibenzo[c,e][1,2]thiazine 5-oxide (6a).

HPLC analysis of **6a**: Chiralpak IA 7:3 *n*-Hexane : Ethyl acetate, 0.5 mL/min;  $t_R = 14.07$  min (*S*),  $t_R = 17.70$  min (*R*).

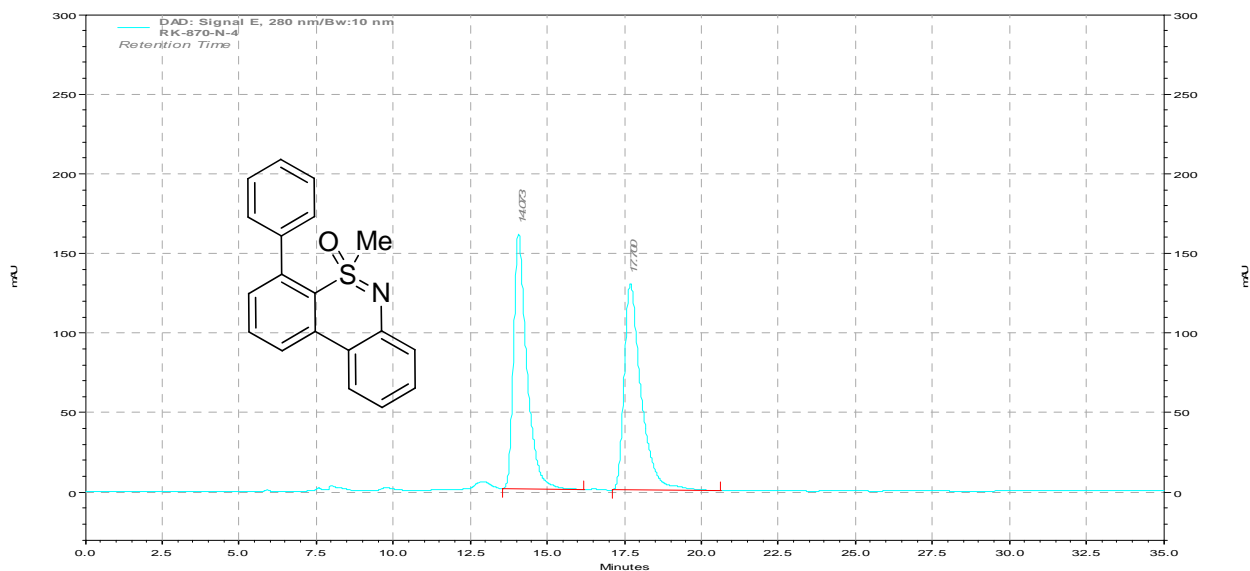

**DAD: Signal E,  
280 nm/Bw:10  
nm Results**

| Retention Time | Area     | Area % | Height | Height % |
|----------------|----------|--------|--------|----------|
| 14.073         | 10116408 | 49.22  | 335880 | 55.26    |
| 17.700         | 10436761 | 50.78  | 271969 | 44.74    |

|        |          |        |        |        |
|--------|----------|--------|--------|--------|
| Totals | 20553169 | 100.00 | 607849 | 100.00 |
|--------|----------|--------|--------|--------|

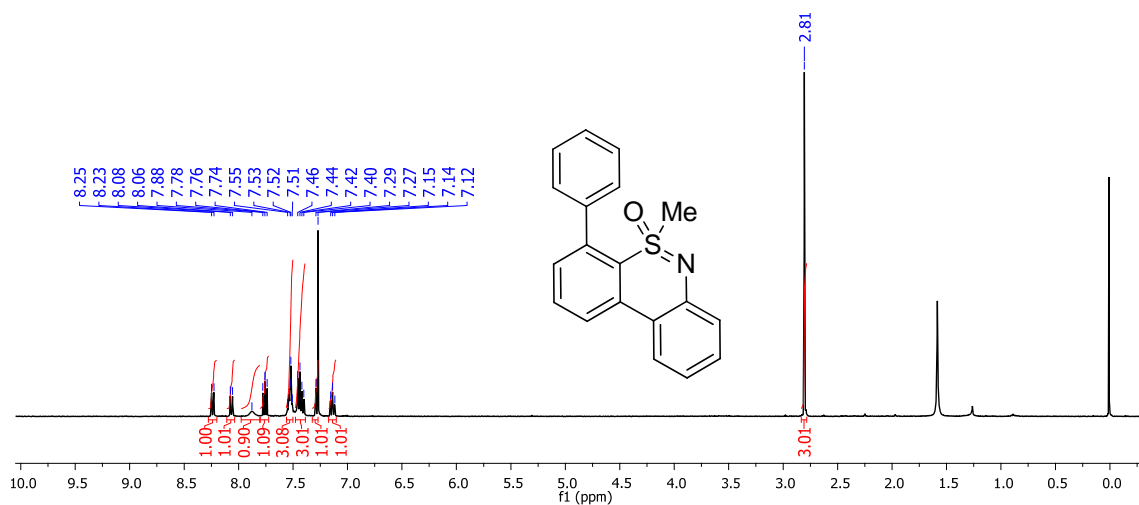

**(R)-(-)-5-Methyl-4-phenyldibenzo[c,e][1,2]thiazine 5-oxide (8a).**

100 mg of **7aa** was taken and 74.4 mg of product **8a** was isolated (yield 74%).

HPLC analysis of **8a**: Chiralpak IA 7:3 *n*-Hexane : Ethyl acetate, 0.5 mL/min;  $t_R$  = 17.64 min (*R*).

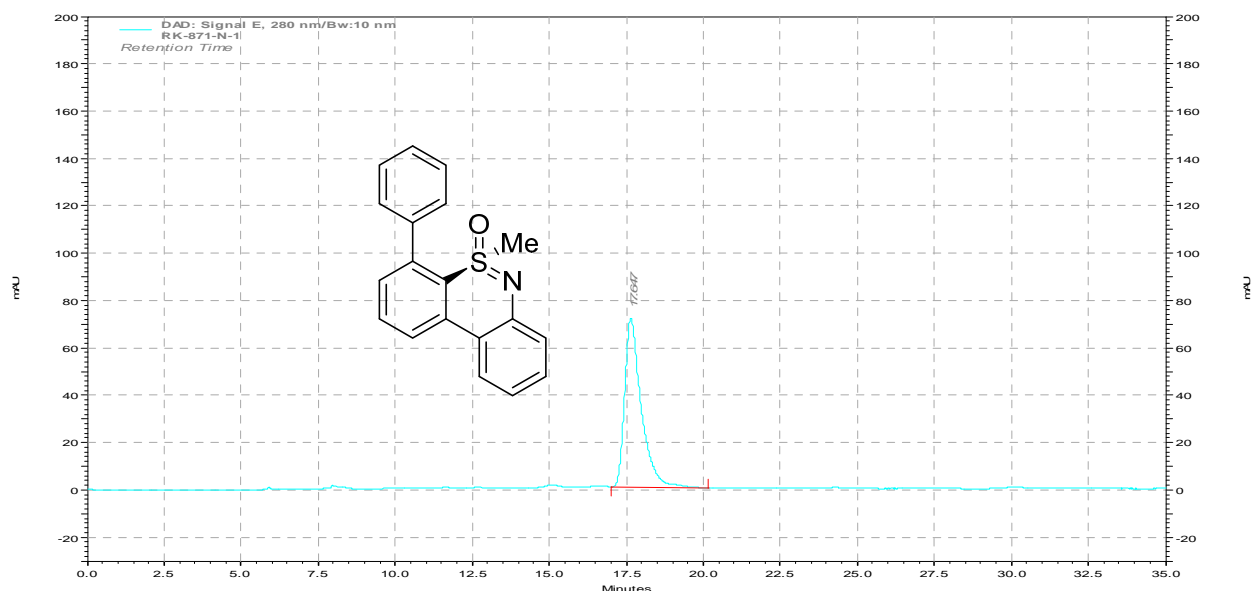

**DAD: Signal E,  
280 nm/Bw:10  
nm Results**

| Retention Time | Area           | Area %        | Height        | Height %      |
|----------------|----------------|---------------|---------------|---------------|
| 17.647         | 5610162        | 100.00        | 149265        | 100.00        |
| <b>Totals</b>  | <b>5610162</b> | <b>100.00</b> | <b>149265</b> | <b>100.00</b> |

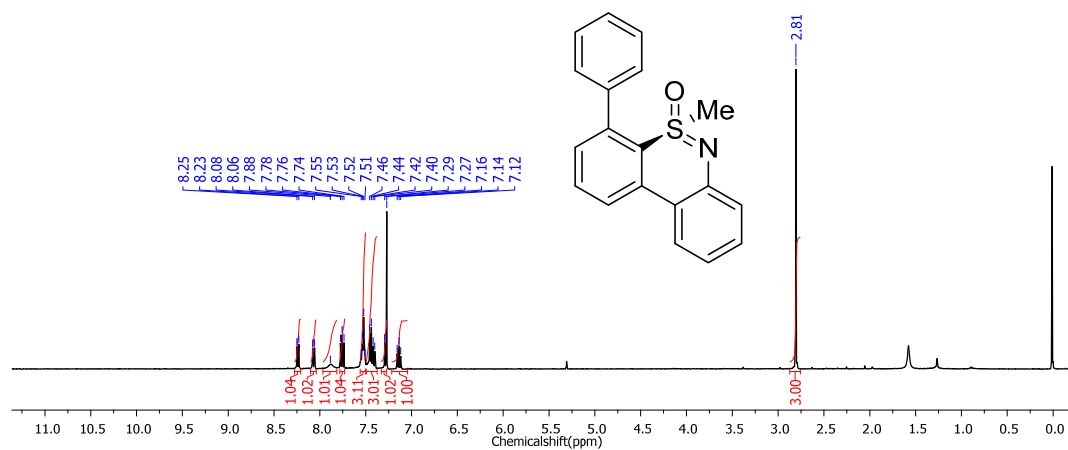

**(S)-(+)-5-Methyl-4-phenyldibenzo[c,e][1,2]thiazine 5-oxide (8e).**

100 mg of **7ba** was taken and 72.4 mg of product **8e** was isolated (yield 72%).

HPLC analysis of **8e**: Chiralpak IA 7:3 *n*-Hexane : Ethyl acetate, 0.5 mL/min;  $t_R = 14.04$  min (S).

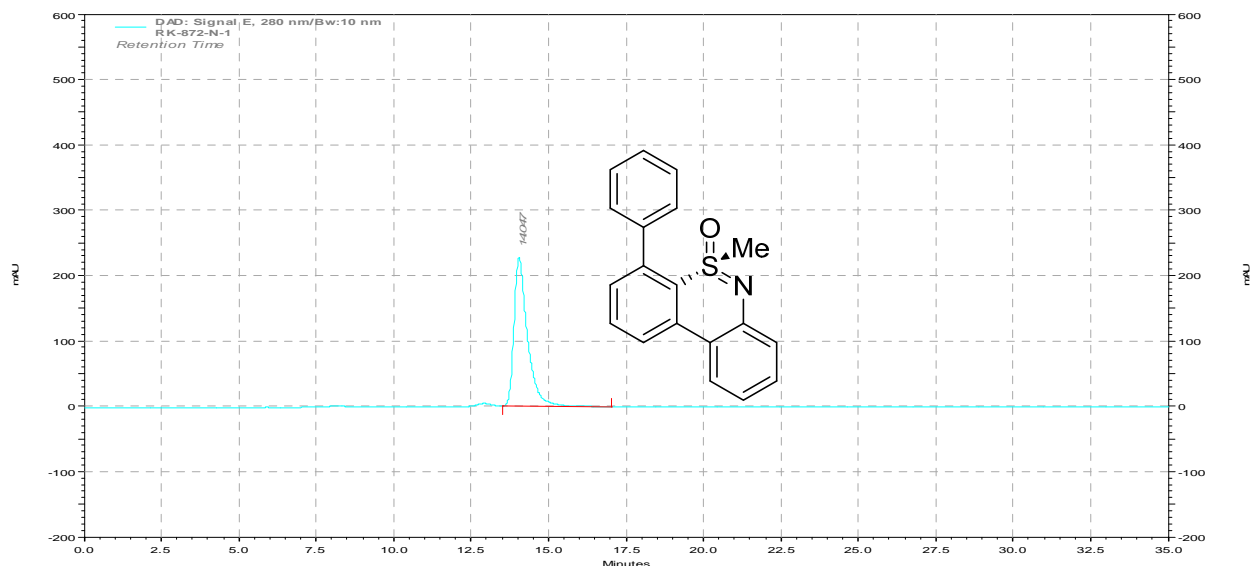

**DAD: Signal E,  
280 nm/Bw:10  
nm Results**

| Retention Time | Area     | Area % | Height | Height % |
|----------------|----------|--------|--------|----------|
| 14.047         | 14447782 | 100.00 | 477825 | 100.00   |
| Totals         | 14447782 | 100.00 | 477825 | 100.00   |

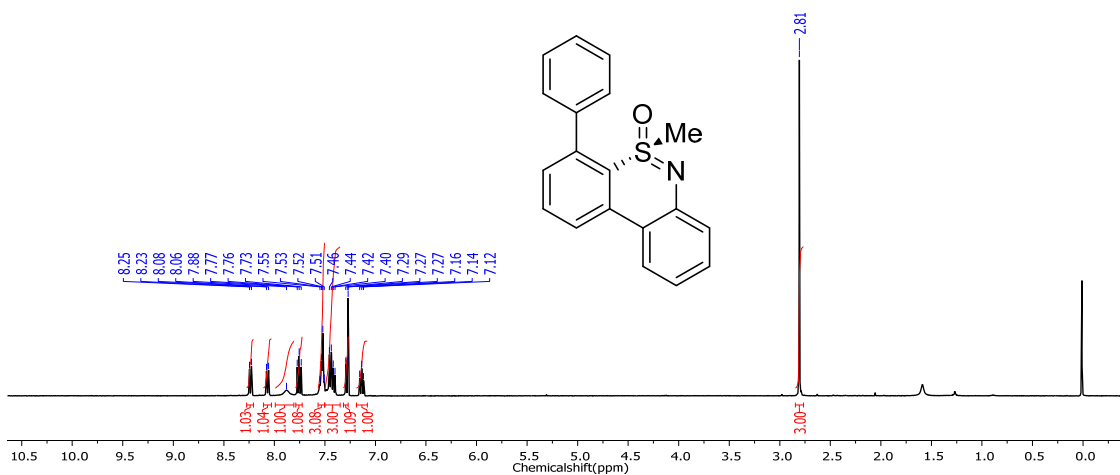



**(R)-(-)-8-Chloro-4-(4-chlorophenyl)-5-methyldibenzo[c,e][1,2]thiazine 5-oxide (8c).**

100 mg of **7af** was taken and 74.5 mg of product **8c** was isolated (yield 75%).

HPLC analysis of **8c**: Chiralpak IA 7:3 *n*-Hexane : Ethyl acetate, 0.5 mL/min;  $t_R = 17.77$  min (*R*).

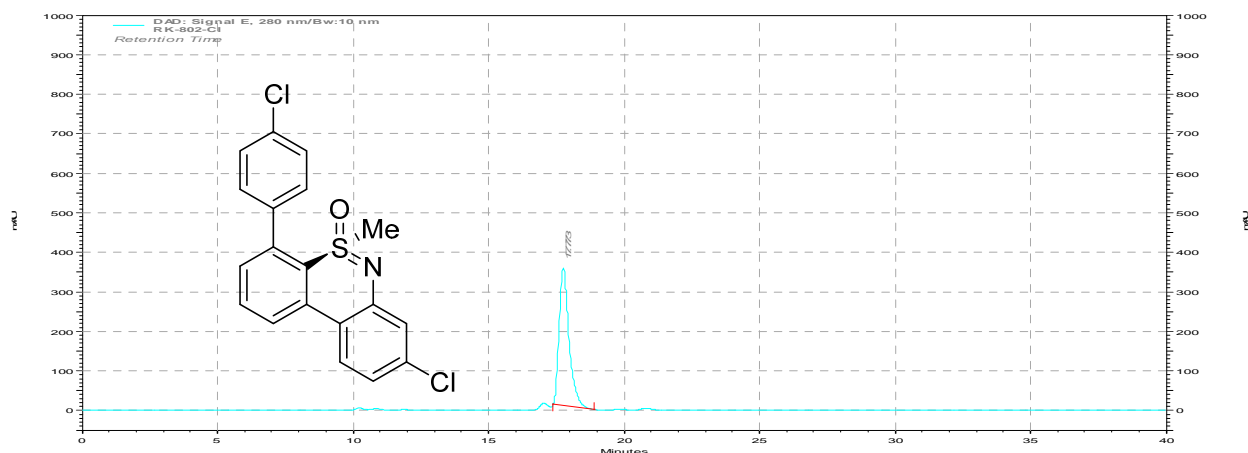

**DAD: Signal E,  
280 nm/Bw:10  
nm Results**

| Retention Time | Area     | Area % | Height | Height % |
|----------------|----------|--------|--------|----------|
| 17.773         | 18630870 | 100.00 | 730877 | 100.00   |

| Totals | Area     | Area % | Height | Height % |
|--------|----------|--------|--------|----------|
|        | 18630870 | 100.00 | 730877 | 100.00   |

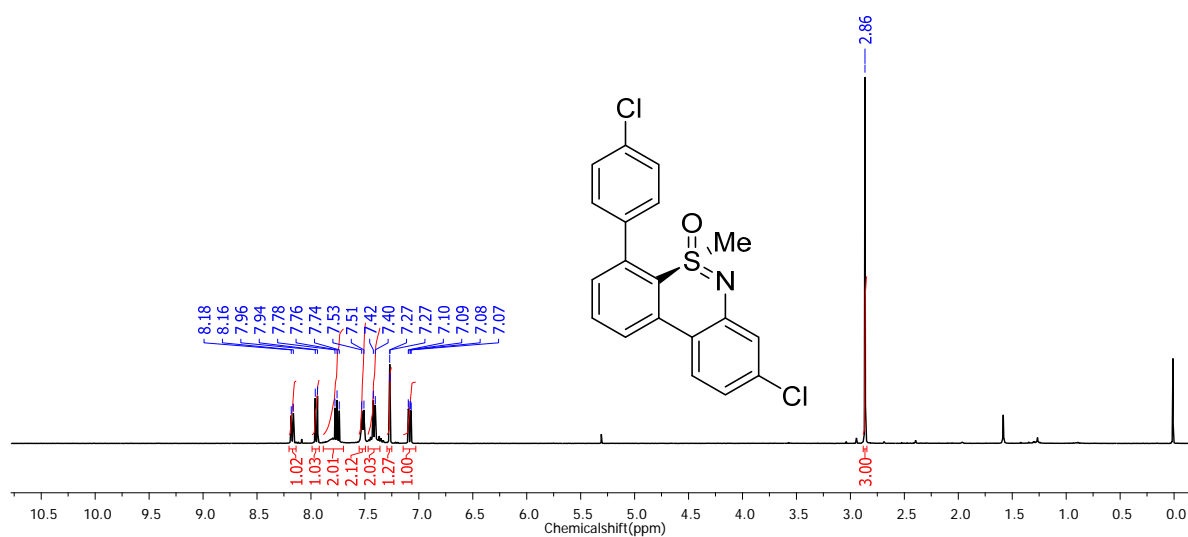

**(R)-(-)-8-Fluoro-4-(4-fluorophenyl)-5-methyldibenzo[c,e][1,2]thiazine 5-oxide (8d).**

100 mg of **7ag** was taken and 78.5 mg of product **8d** was isolated (yield 79%).

HPLC analysis of **8d**: Chiralpak IA 7:3 *n*-Hexane : Ethyl acetate, 0.5 mL/min;  $t_R = 15.01$  min  
(*R*).

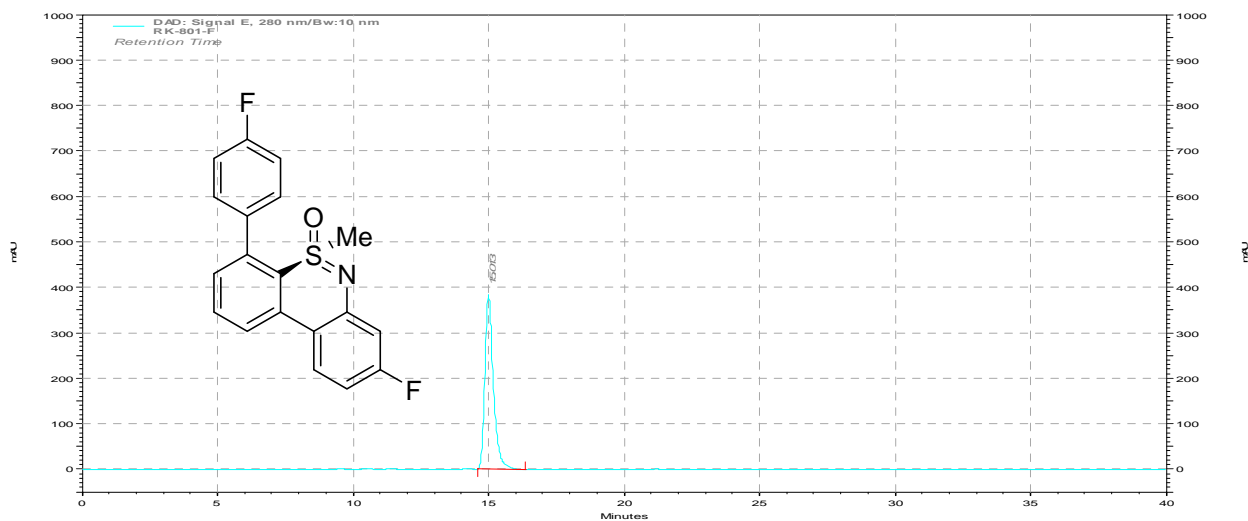

**DAD: Signal E,  
280 nm/Bw:10  
nm Results**

| Retention Time | Area     | Area % | Height | Height % |
|----------------|----------|--------|--------|----------|
| 15.013         | 17692346 | 100.00 | 804860 | 100.00   |

|        |          |        |        |        |
|--------|----------|--------|--------|--------|
| Totals | 17692346 | 100.00 | 804860 | 100.00 |
|--------|----------|--------|--------|--------|

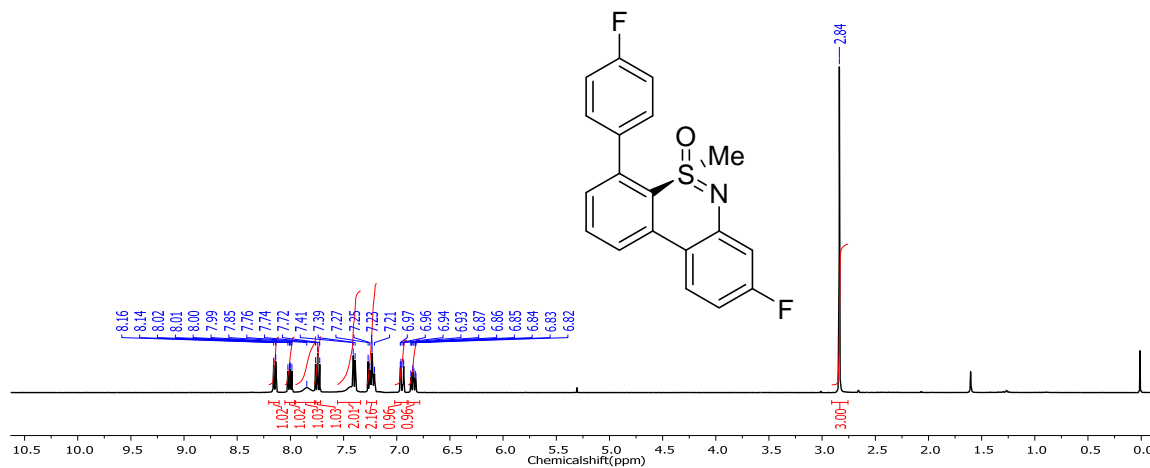

**4-([1,1'-Biphenyl]-4-yl)-5-methyl-8 phenyldibenzo[c,e][1,2]thiazine 5-oxide (6b).**

HPLC analysis of **6b**: Chiralpak IA 7:3 *n*-Hexane : Ethyl acetate, 0.5 mL/min;  $t_R = 24.31$  min (*S*),  $t_R = 33.02$  min (*R*).

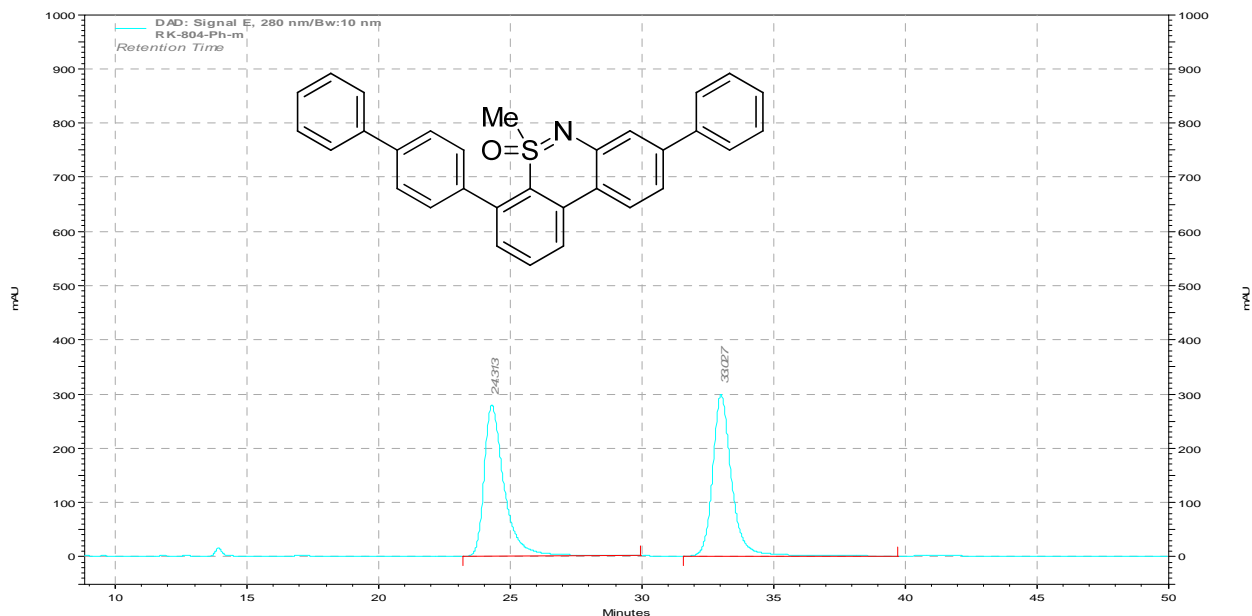

**DAD: Signal E,  
280 nm/Bw:10  
nm Results**

| Retention Time | Area     | Area % | Height | Height % |
|----------------|----------|--------|--------|----------|
| 24.313         | 31140080 | 49.79  | 584240 | 48.29    |
| 33.027         | 31402759 | 50.21  | 625676 | 51.71    |

| Totals | Area     | Area % | Height  | Height % |
|--------|----------|--------|---------|----------|
|        | 62542839 | 100.00 | 1209916 | 100.00   |

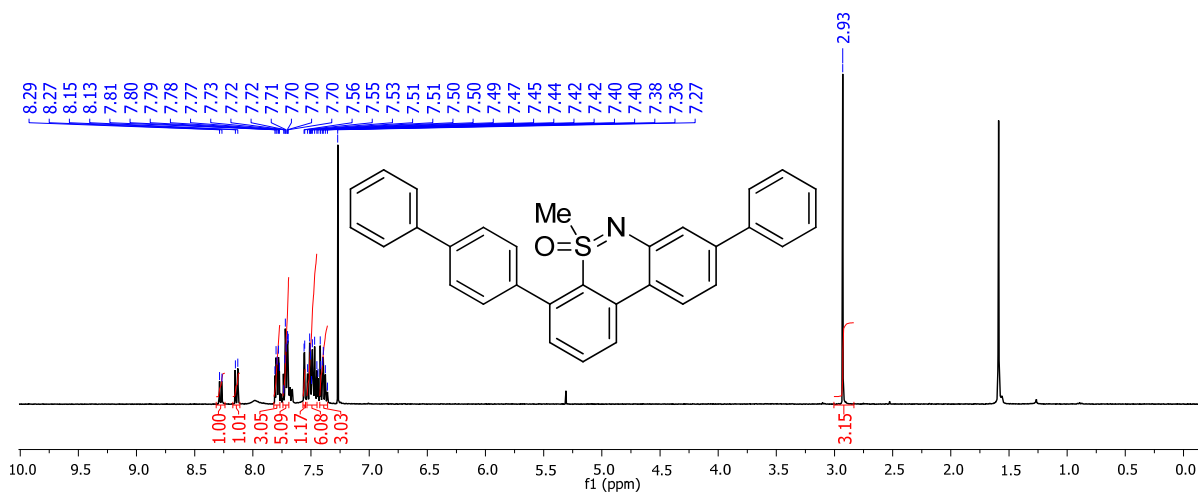

**(S)-(+)-4-([1,1'-Biphenyl]-4-yl)-5-methyl-8-phenyldibenzo[*c,e*][1,2]thiazine 5-oxide (8f).**

100 mg of **7bb** was taken and 81.6 mg of product **8f** was isolated (yield 82%).

HPLC analysis of **8f**: Chiralpak IA 7:3 *n*-Hexane : Ethyl acetate, 0.5 mL/min;  $t_R = 24.31$  min

(*S*).

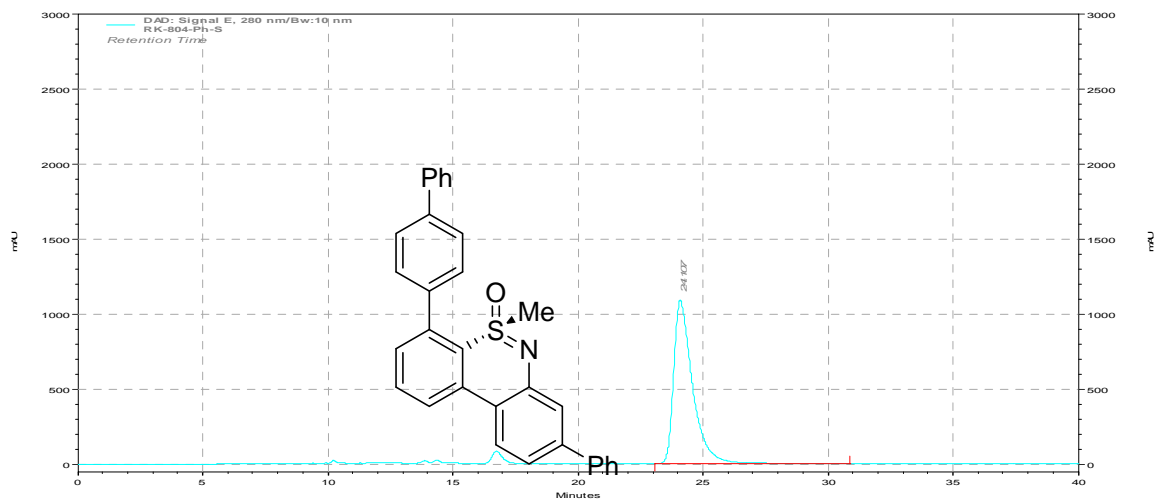

**DAD: Signal E,  
280 nm/Bw:10  
nm Results**

| Retention Time | Area      | Area % | Height  | Height % |
|----------------|-----------|--------|---------|----------|
| 24.107         | 120311701 | 100.00 | 2286249 | 100.00   |
| Totals         | 120311701 | 100.00 | 2286249 | 100.00   |

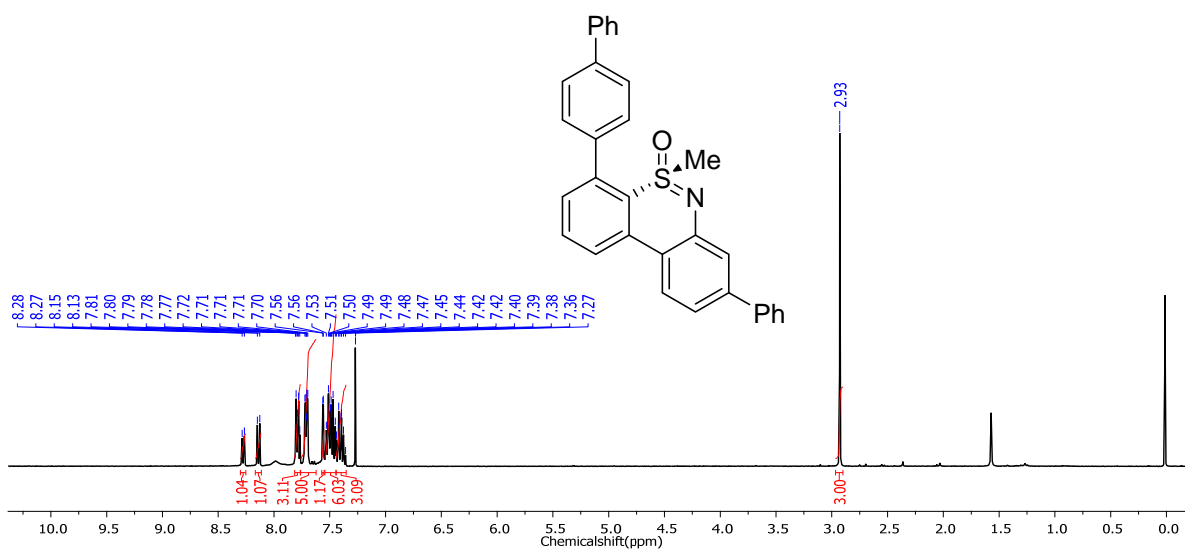



### 8-Bromo-4-(4-bromophenyl)-5-methyldibenzo[c,e][1,2]thiazine 5-oxide (6e).

HPLC analysis of 6e: Chiralpak IA 7:3 *n*-Hexane : Ethyl acetate, 0.5 mL/min;  $t_R = 14.33$  min (*S*),  $t_R = 21.02$  min (*R*).

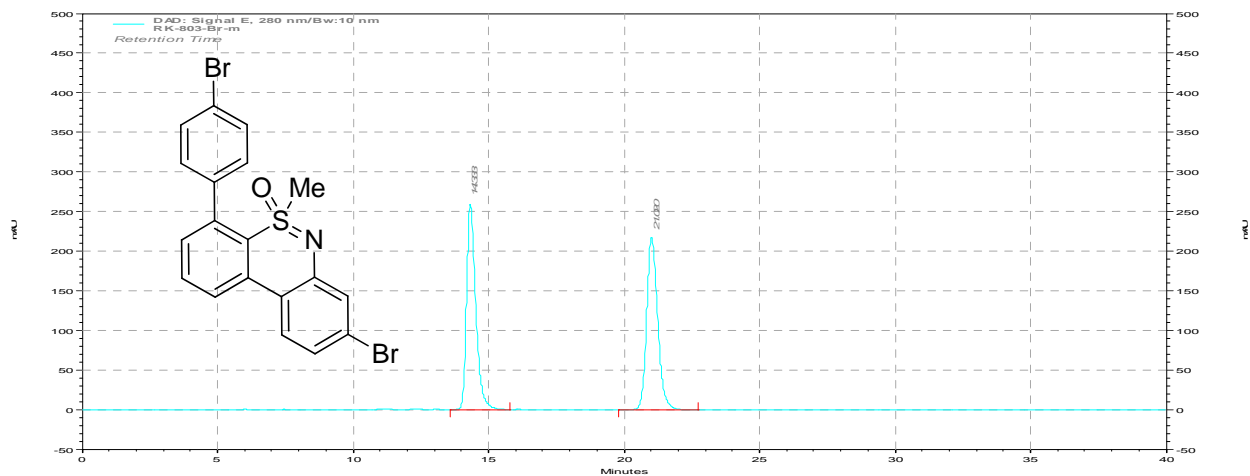

**DAD: Signal E,  
280 nm/Bw:10  
nm Results**

| Retention Time | Area     | Area % | Height | Height % |
|----------------|----------|--------|--------|----------|
| 14.333         | 12784527 | 49.62  | 542993 | 54.34    |
| 21.020         | 12981589 | 50.38  | 456238 | 45.66    |

| Totals | Area     | Area % | Height | Height % |
|--------|----------|--------|--------|----------|
|        | 25766116 | 100.00 | 999231 | 100.00   |

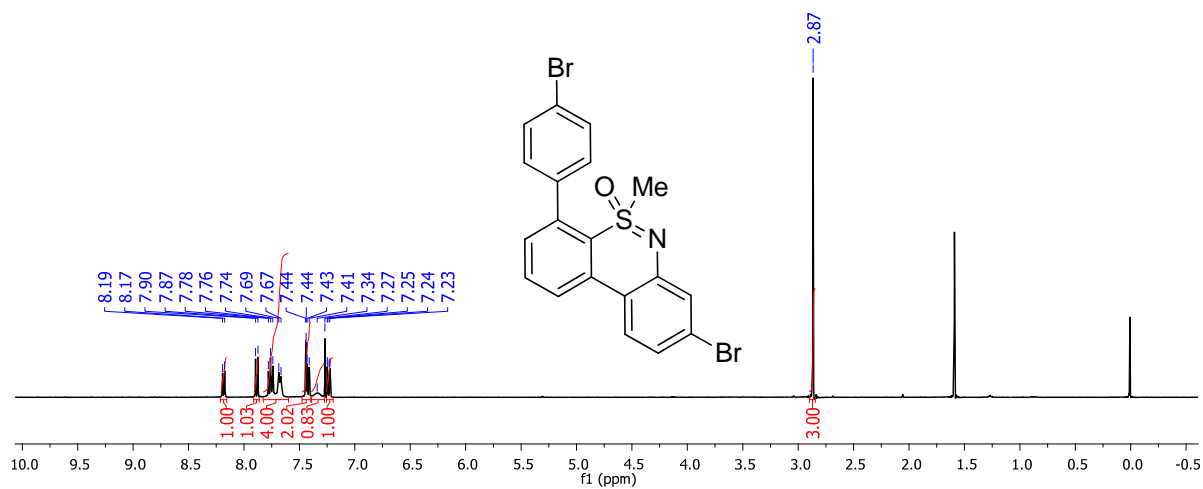

**(S)-(+)-8-Bromo-4-(4-bromophenyl)-5-methyldibenzo[c,e][1,2]thiazine 5-oxide (8g).**

100 mg of **7be** was taken and 82.0 mg of product **8g** was isolated (yield 83%).

HPLC analysis of **8g**: Chiralpak IA 7:3 *n*-Hexane : Ethyl acetate, 0.5 mL/min;  $t_R = 14.38$  min (S).

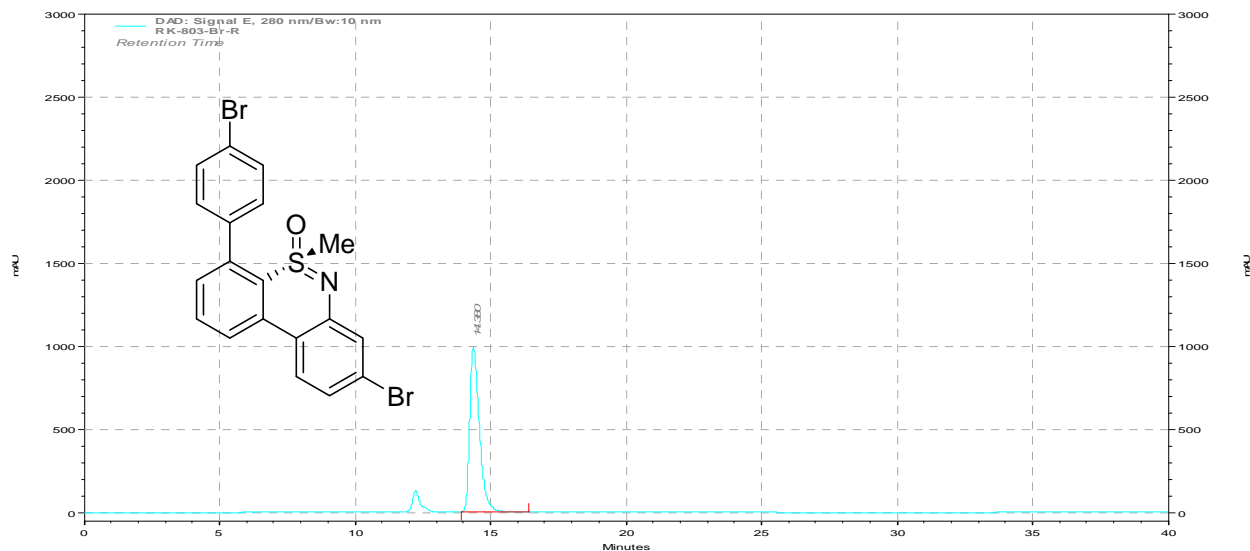

**DAD: Signal E,  
280 nm/Bw:10  
nm Results**

| Retention Time | Area     | Area % | Height  | Height % |
|----------------|----------|--------|---------|----------|
| 14.380         | 51349286 | 100.00 | 2076540 | 100.00   |
| Totals         | 51349286 | 100.00 | 2076540 | 100.00   |

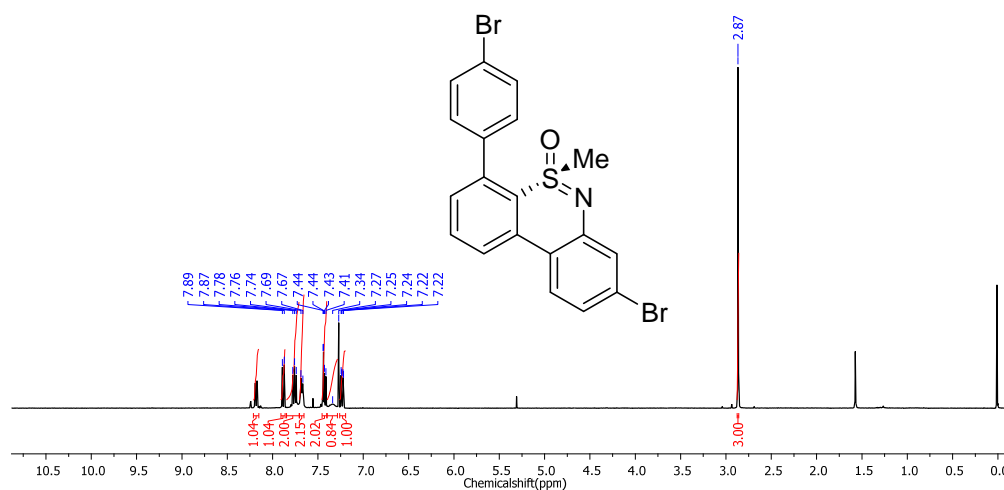

## 2'-(S-Methylsulfonimidoyl)-1,1':3',1''-terphenyl (5a).

HPLC analysis of 5a: Chiralpak IA 6:4 *n*-Hexane : Ethyl acetate, 0.5 mL/min;  $t_R = 21.27$  min (*S*),  $t_R = 23.28$  min (*R*).

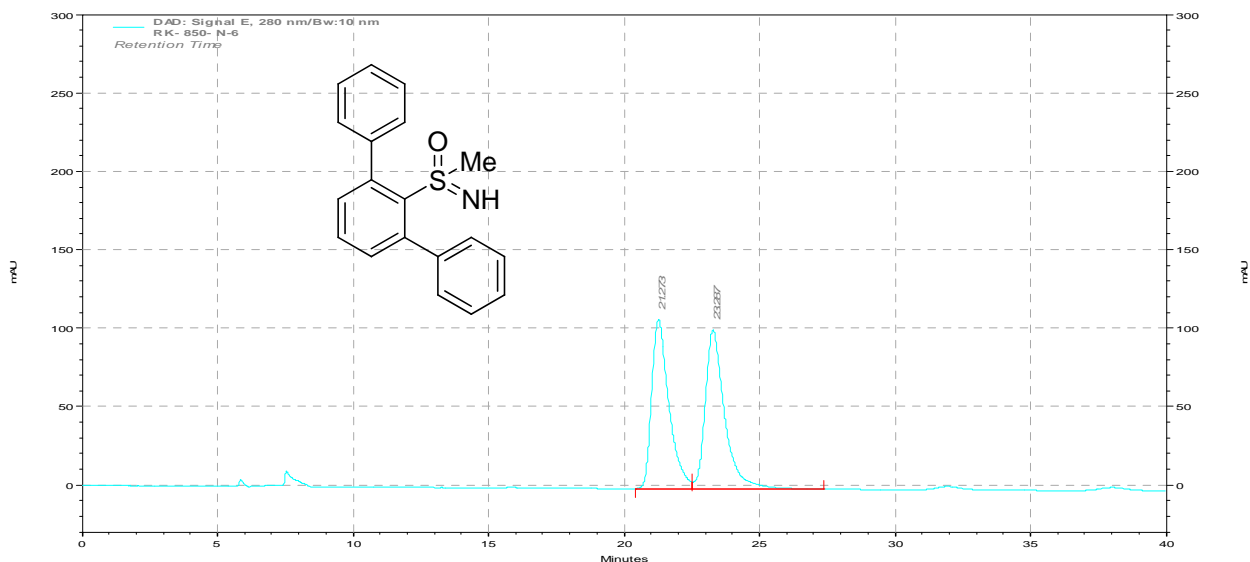

### DAD: Signal E, 280 nm/Bw:10 nm Results

| Retention Time | Area     | Area % | Height | Height % |
|----------------|----------|--------|--------|----------|
| 21.273         | 10002524 | 48.58  | 226528 | 51.63    |
| 23.287         | 10588614 | 51.42  | 212195 | 48.37    |

| Totals | Area     | Area % | Height | Height % |
|--------|----------|--------|--------|----------|
|        | 20591138 | 100.00 | 438723 | 100.00   |

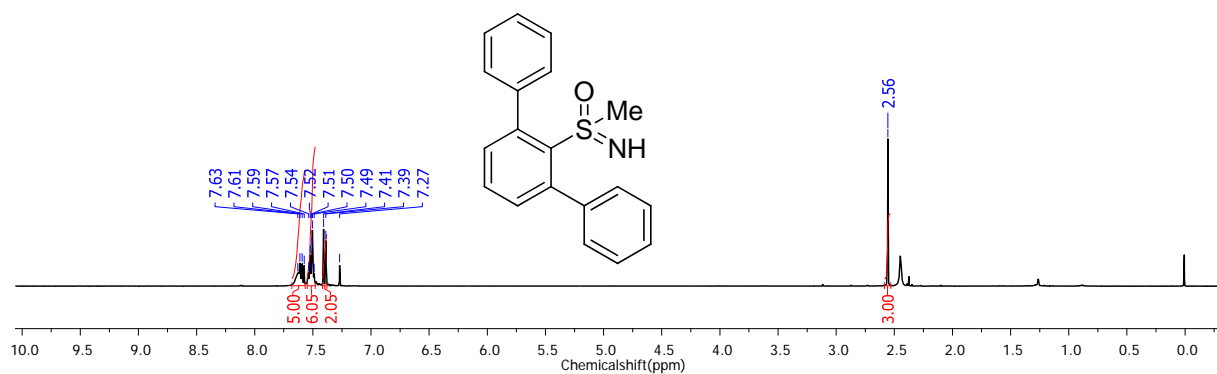

**(R)-(-)-[1,1':3',1''-Terphenyl]-2'-yl(imino)(methyl)sulfanone (7aa).**

100 mg of **7a** was taken and 128.7 mg of product **7aa** was isolated (yield 65%). 3.0 equiv of boronic acid (**2a**) was taken.

HPLC analysis of **7aa**: Chiralpak IA 6:4 *n*-Hexane : Ethyl acetate, 0.5 mL/min;  $t_R$  = 23.26 min (*R*).

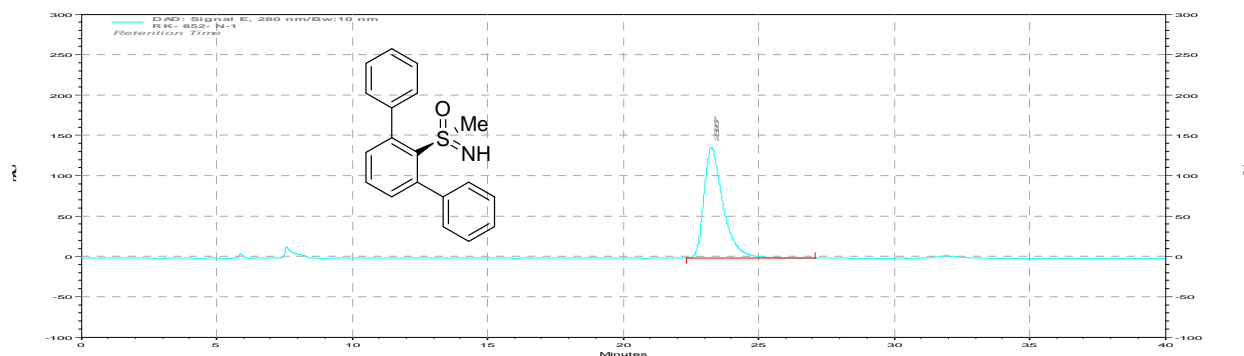

**DAD: Signal E,  
280 nm/Bw:10  
nm Results**

| Retention Time | Area     | Area % | Height | Height % |
|----------------|----------|--------|--------|----------|
| 23.267         | 14140439 | 100.00 | 287085 | 100.00   |

| Totals | Area     | Area % | Height | Height % |
|--------|----------|--------|--------|----------|
|        | 14140439 | 100.00 | 287085 | 100.00   |

**(S)-(+)-[1,1':3',1''-Terphenyl]-2'-yl(imino)(methyl)sulfanone (7ba).**

100 mg of **7b** was taken and 133.0 mg of product **7ba** was isolated (yield 67%). 3.0 equiv of boronic acid (**2a**) was taken.

HPLC analysis of **7ba**: Chiralpak IA 6:4 *n*-Hexane : Ethyl acetate, 0.5 mL/min;  $t_R$  = 21.26 min (*S*).

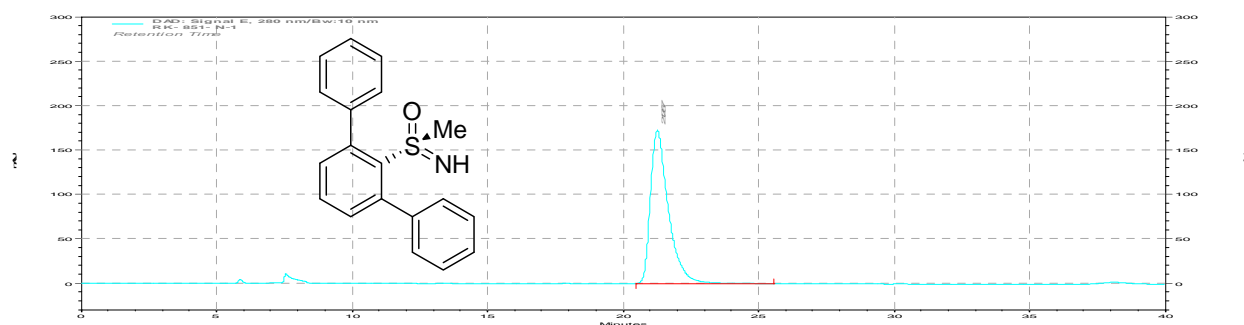

**DAD: Signal E,  
280 nm/Bw:10**

## nm Results

| Retention Time | Area     | Area % | Height | Height % |
|----------------|----------|--------|--------|----------|
| 21.267         | 16713945 | 100.00 | 362213 | 100.00   |

|        |          |        |        |        |
|--------|----------|--------|--------|--------|
| Totals | 16713945 | 100.00 | 362213 | 100.00 |
|--------|----------|--------|--------|--------|

### (R)-(-)-(4,4''-Diiodo-[1,1':3',1''-terphenyl]-2'-yl)(imino)(methyl)sulfanone (**7ad**).

100 mg of **7a** was taken and 227 mg of product **7ad** was isolated (yield 63%). 3.0 equiv of boronic acid (**2d**) was taken.

HPLC analysis of **7ad**: Chiralpak IA 6:4 *n*-Hexane : Ethyl acetate, 0.5 mL/min;  $t_R = 23.50$  min (*R*).

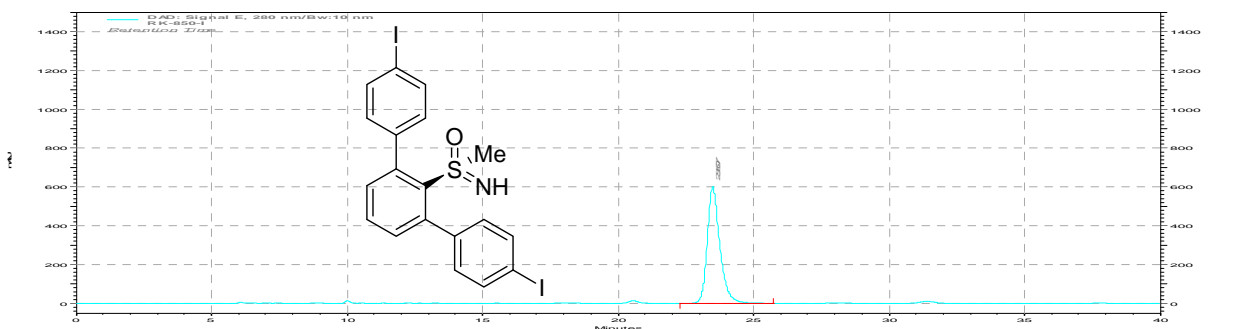

### DAD: Signal E, 280 nm/Bw:10 nm Results

| Retention Time | Area     | Area % | Height  | Height % |
|----------------|----------|--------|---------|----------|
| 23.507         | 40833180 | 100.00 | 1262191 | 100.00   |

|        |          |        |         |        |
|--------|----------|--------|---------|--------|
| Totals | 40833180 | 100.00 | 1262191 | 100.00 |
|--------|----------|--------|---------|--------|

### (R)-(-)-(4,4''-Dichloro-[1,1':3',1''-terphenyl]-2'-yl)(imino)(methyl)sulfanone (**7af**).

100 mg of **7a** was taken and 144.6 mg of product **7af** was isolated (yield 60%). 3.0 equiv of boronic acid (**2f**) was taken.

HPLC analysis of **7af**: Chiralpak IA 6:4 *n*-Hexane : Ethyl acetate, 0.5 mL/min;  $t_R = 18.76$  min (*R*).

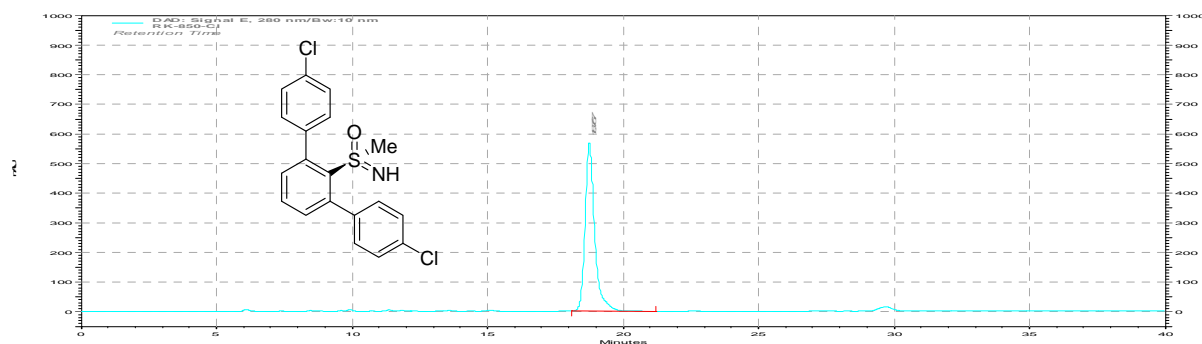

**DAD: Signal E,  
280 nm/Bw:10  
nm Results**

| Retention Time | Area     | Area % | Height  | Height % |
|----------------|----------|--------|---------|----------|
| 18.767         | 29470445 | 100.00 | 1190787 | 100.00   |

|        |          |        |         |        |
|--------|----------|--------|---------|--------|
| Totals | 29470445 | 100.00 | 1190787 | 100.00 |
|--------|----------|--------|---------|--------|

**(R)-(-)-(4,4''-Difluoro-[1,1':3',1''-terphenyl]-2'-yl)(imino)(methyl)sulfanone (7ag).**

100 mg of **7a** was taken and 137 mg of product **7ag** was isolated (yield 62%). 3.0 equiv of boronic acid (**2g**) was taken.

HPLC analysis of **7ag**: Chiralpak IA 6:4 *n*-Hexane : Ethyl acetate, 0.5 mL/min;  $t_R = 17.36$  min (*R*).

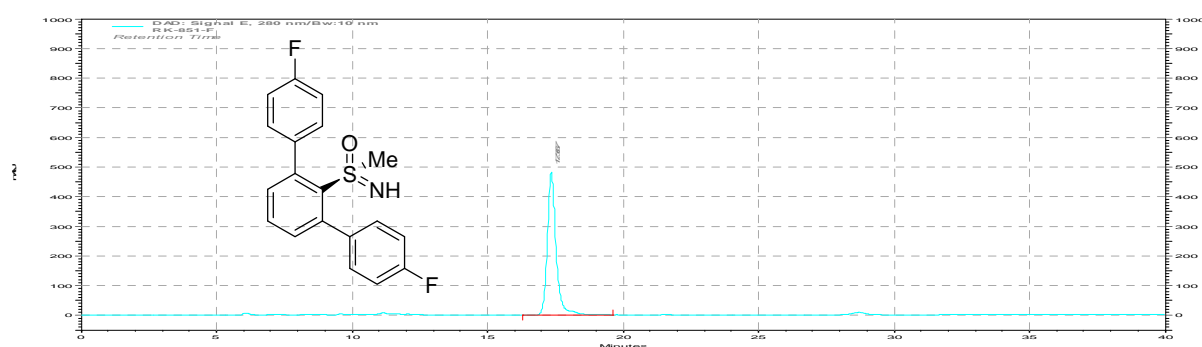

**DAD: Signal E,  
280 nm/Bw:10  
nm Results**

| Retention Time | Area     | Area % | Height  | Height % |
|----------------|----------|--------|---------|----------|
| 17.367         | 22660941 | 100.00 | 1009735 | 100.00   |

|        |          |        |         |        |
|--------|----------|--------|---------|--------|
| Totals | 22660941 | 100.00 | 1009735 | 100.00 |
|--------|----------|--------|---------|--------|

**(S)-(+)-[1,1':4',1'':3'',1''':4''',1''''-Quinquephenyl]-2''-yl(imino)(methyl)sulfanone (7bb).**

100 mg of **7b** was taken and 192.4 mg of product **7bb** was isolated (yield 65%). 3.0 equiv of boronic acid (**2b**) was taken.

HPLC analysis of **7bb**: Chiralpak IA 6:4 *n*-Hexane : Ethyl acetate, 0.5 mL/min;  $t_R = 21.26$  min (*S*).

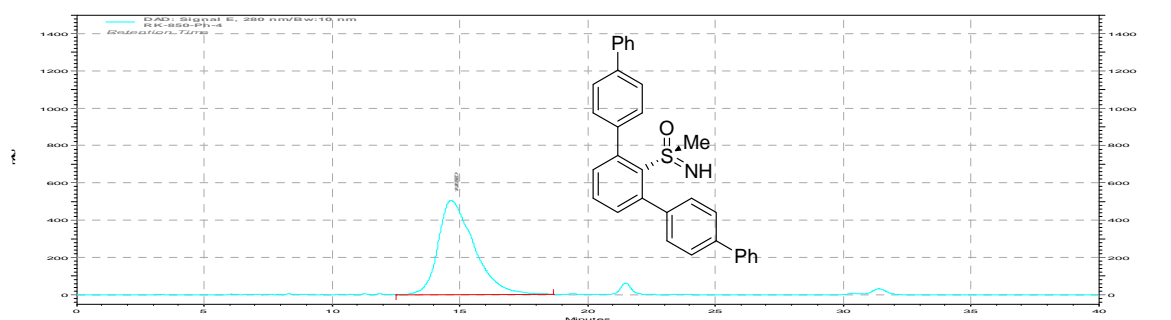

**DAD: Signal E,  
280 nm/Bw:10  
nm Results**

| Retention Time | Area      | Area % | Height  | Height % |
|----------------|-----------|--------|---------|----------|
| 14.680         | 102546930 | 100.00 | 1055789 | 100.00   |

|        |           |        |         |        |
|--------|-----------|--------|---------|--------|
| Totals | 102546930 | 100.00 | 1055789 | 100.00 |
|--------|-----------|--------|---------|--------|

**(S)-(+)-(4,4''-Dibromo-[1,1':3',1''-terphenyl]-2''-yl)(imino)(methyl)sulfanone (7bc).**

100 mg of **7b** was taken and 181.7 mg of product **7bc** was isolated (yield 61%). 3.0 equiv of boronic acid (**2c**) was taken.

HPLC analysis of **7bc**: Chiralpak IA 6:4 *n*-Hexane : Ethyl acetate, 0.5 mL/min;  $t_R = 23.30$  min (*S*).

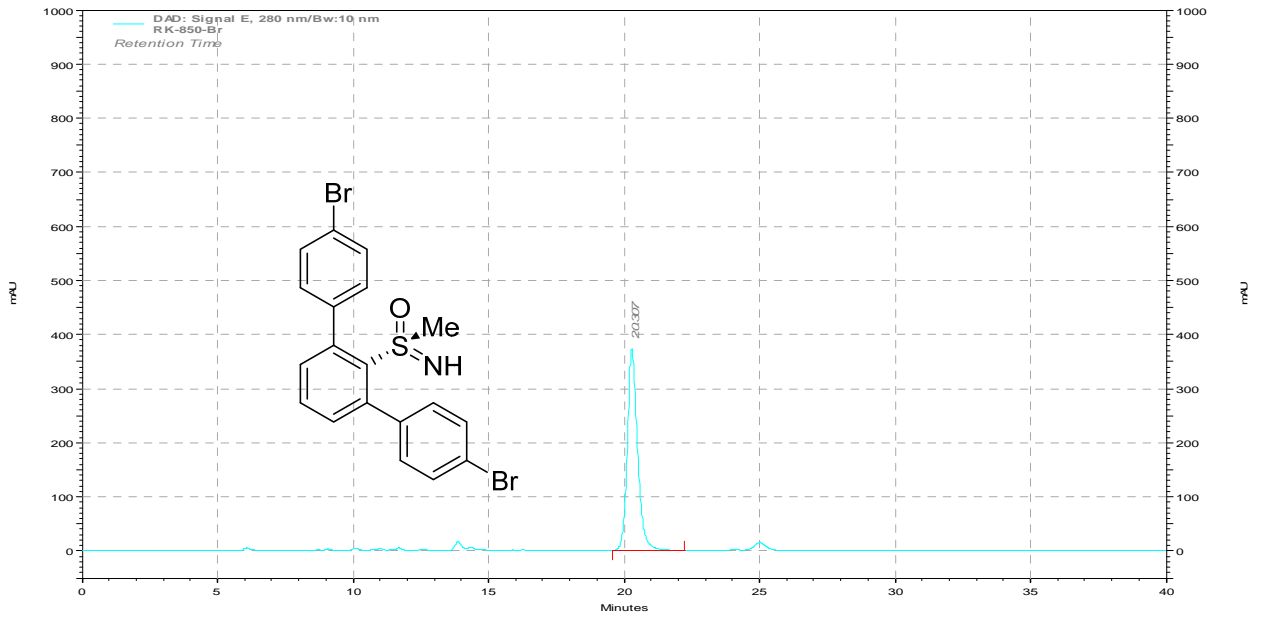

**DAD: Signal E,  
 280 nm/Bw:10  
 nm Results**

| Retention Time | Area            | Area %        | Height        | Height %      |
|----------------|-----------------|---------------|---------------|---------------|
| 20.307         | 20584097        | 100.00        | 781762        | 100.00        |
| <b>Totals</b>  | <b>20584097</b> | <b>100.00</b> | <b>781762</b> | <b>100.00</b> |



**2'-(S-Methylsulfonimidoyl)-1,1':3',1''-terphenyl (5aa).**

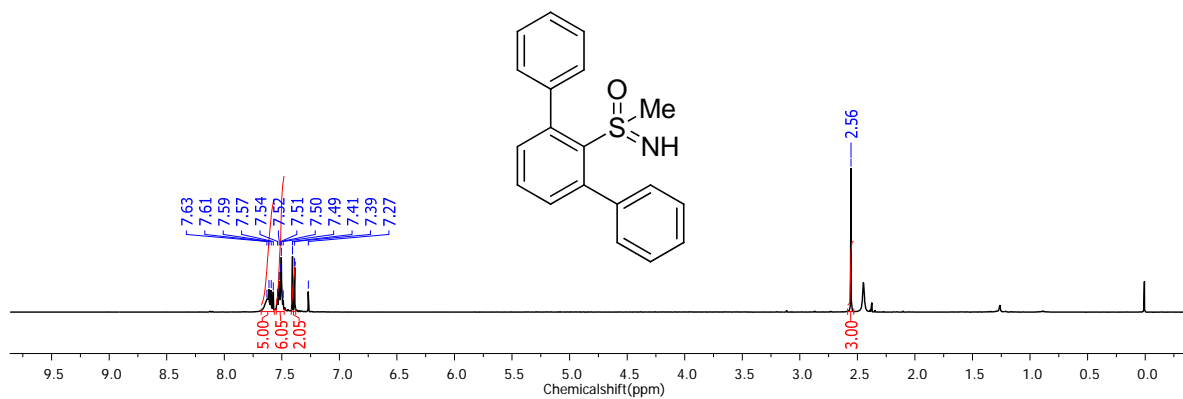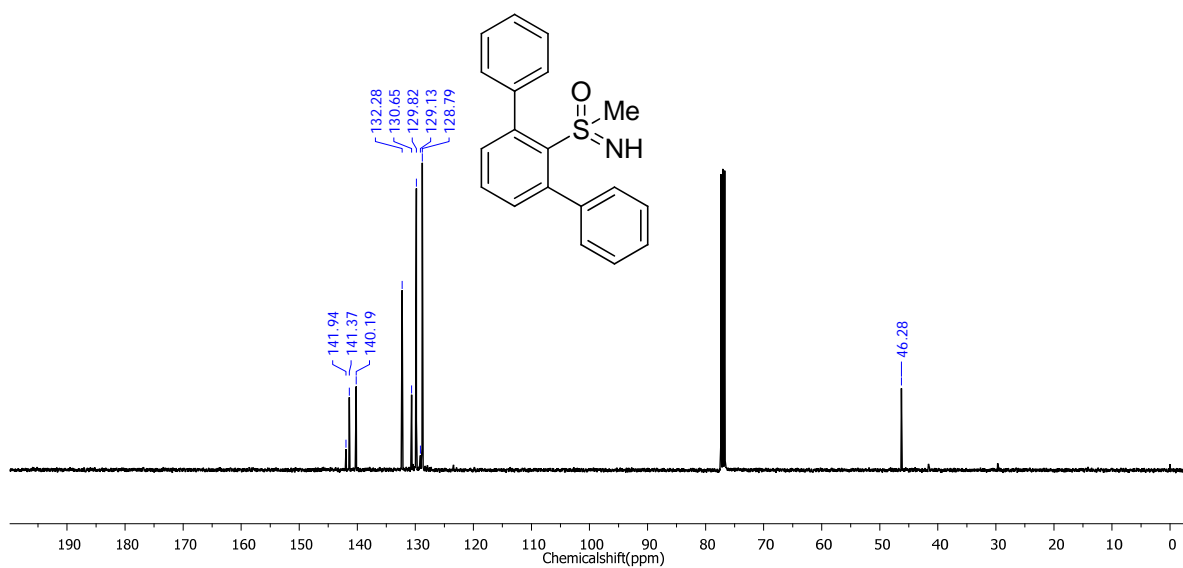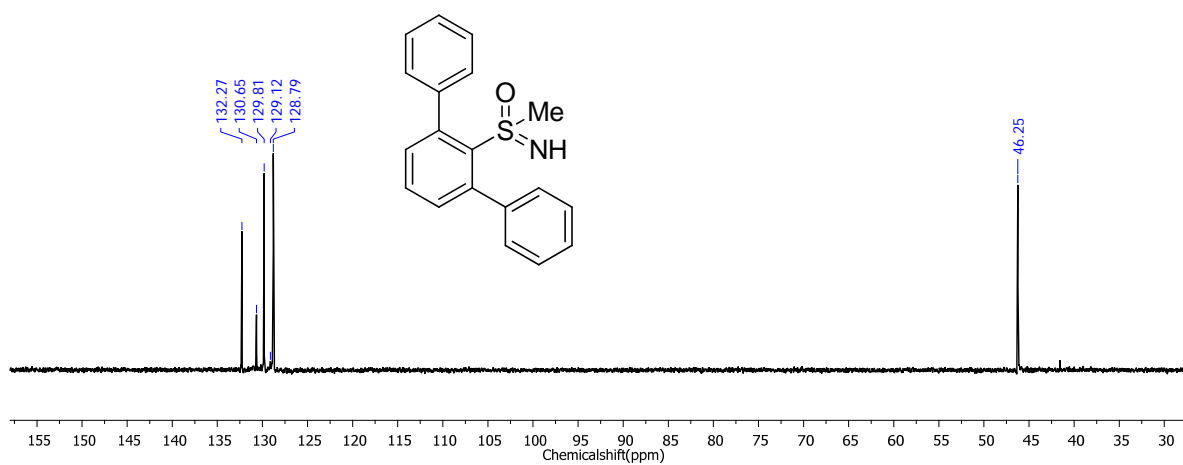

2''-(*S*-Methylsulfonylimidoyl)-1,1':4',1''':3'',1''':4''',1''''-quinquephenyl (5ab).

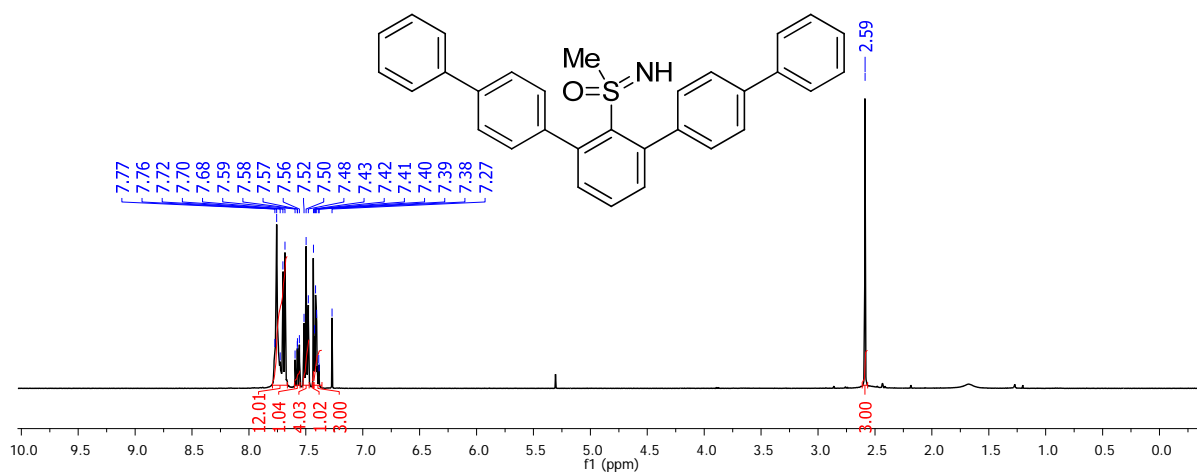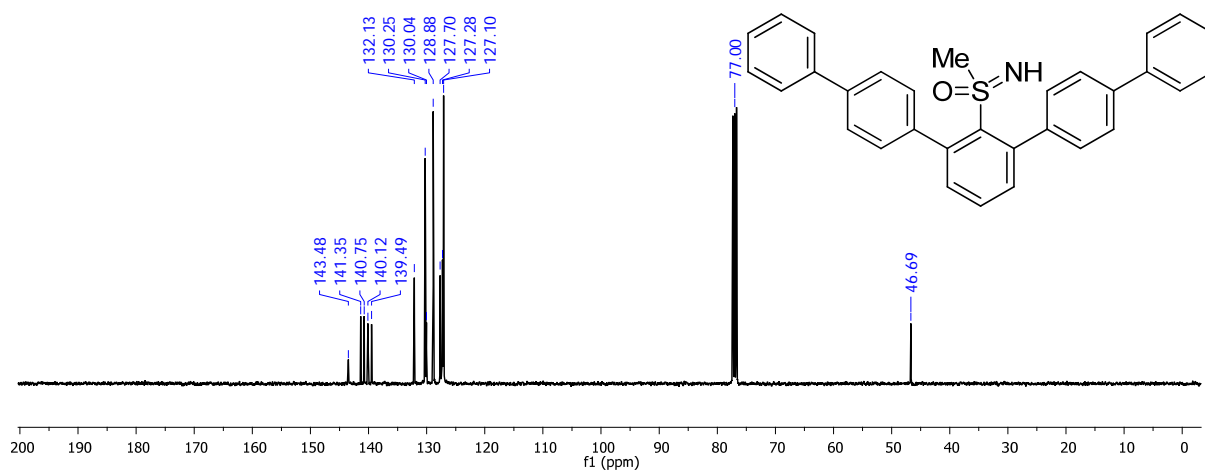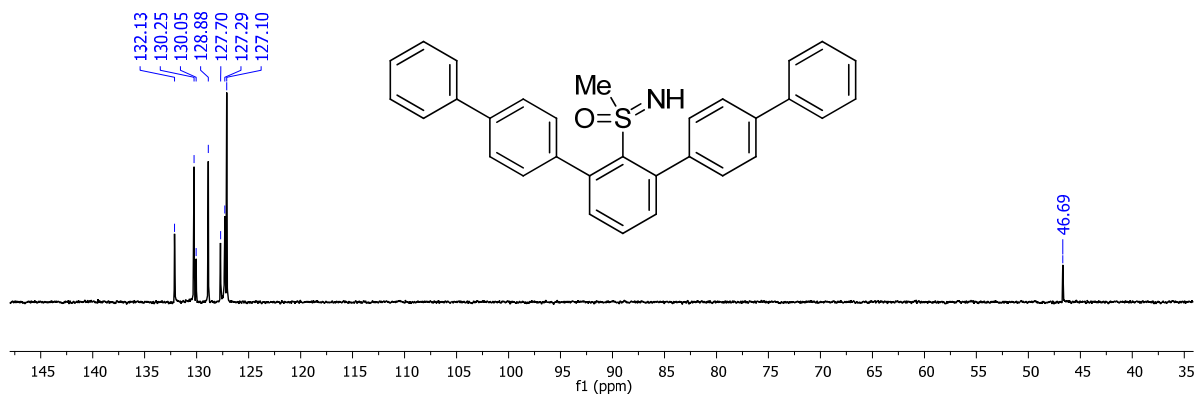

4,4''-Dimethoxy-2'-(*S*-methylsulfonimidoyl)-1,1':3',1''-terphenyl (5ac).

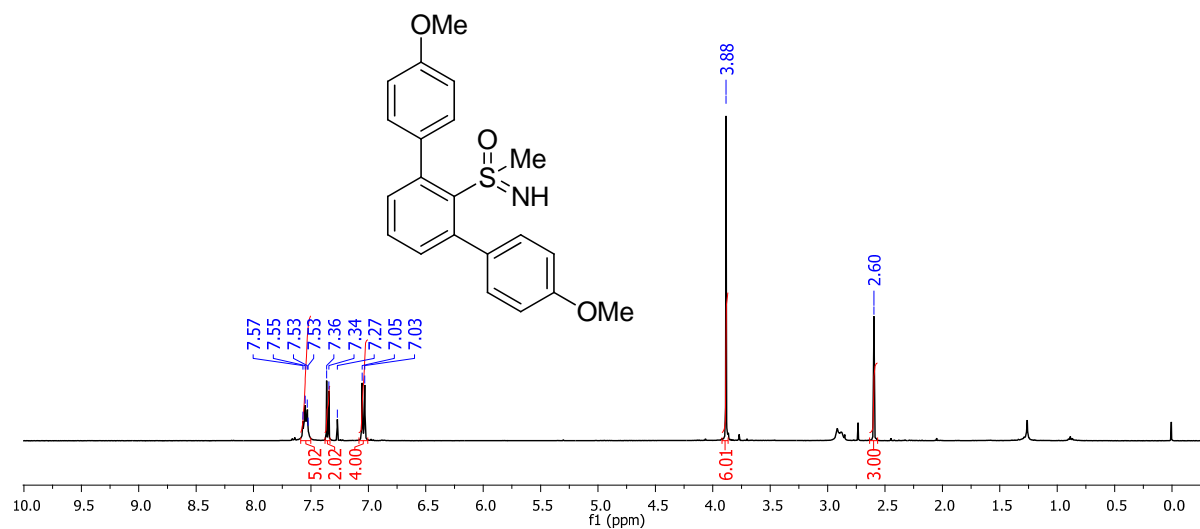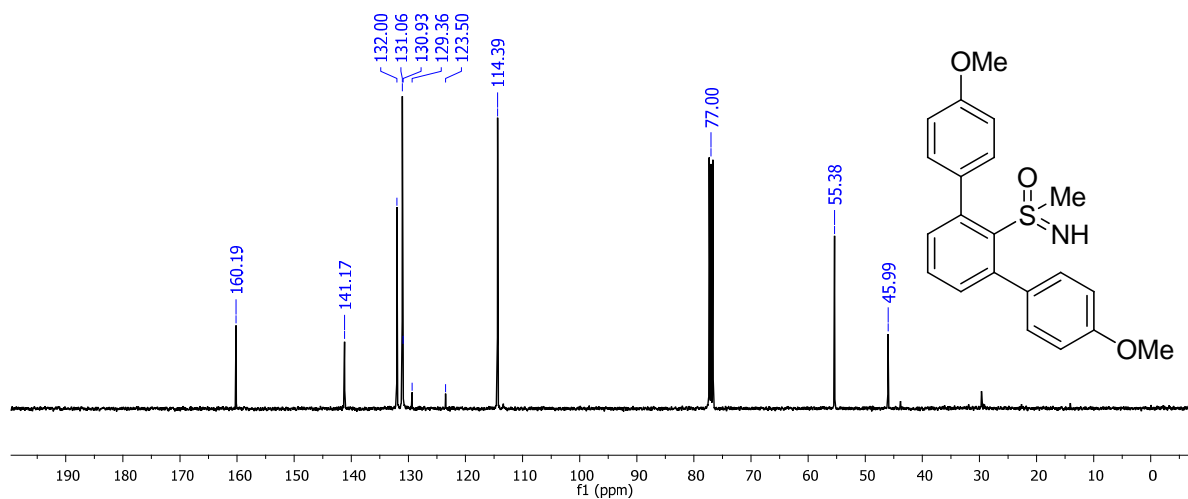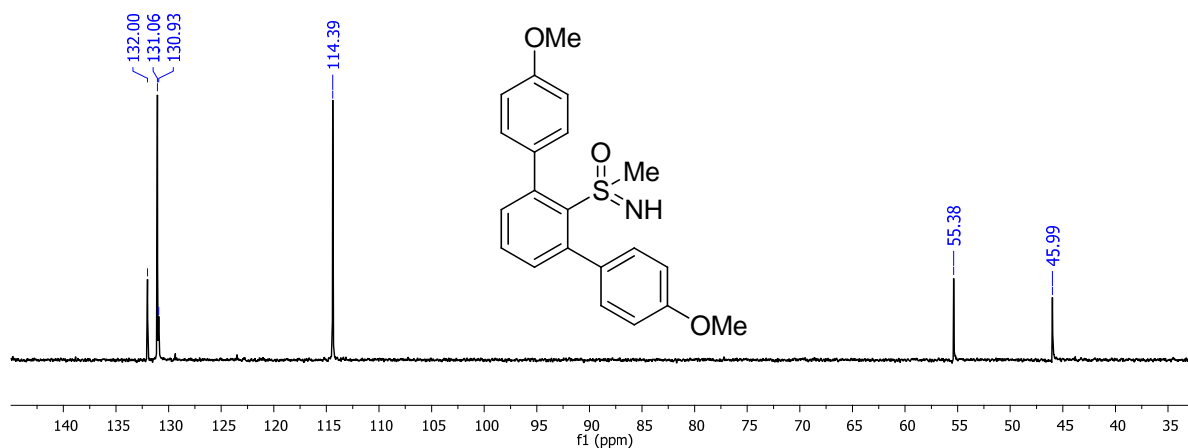

**4,4''-Iodo-2'-(*S*-methylsulfonimidoyl)-1,1':3',1''-terphenyl (5ad).**

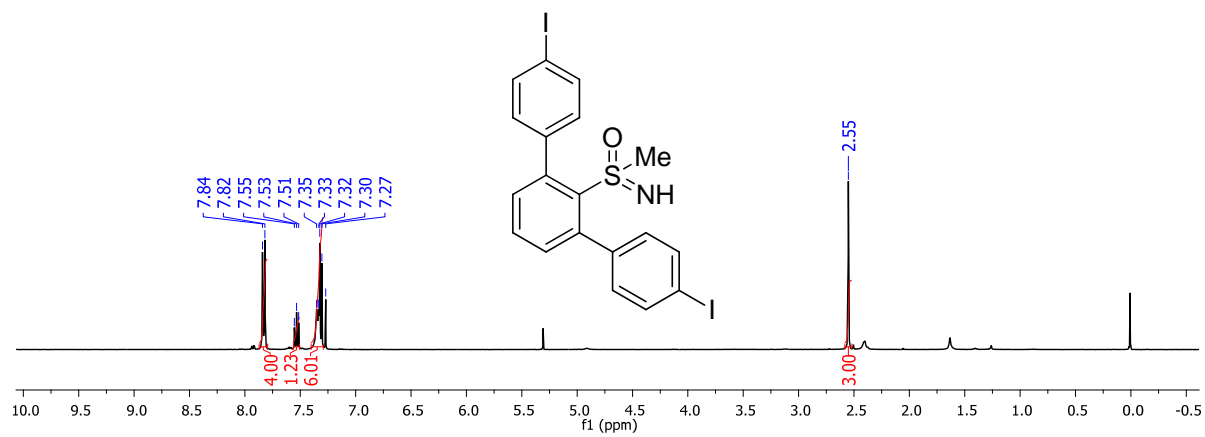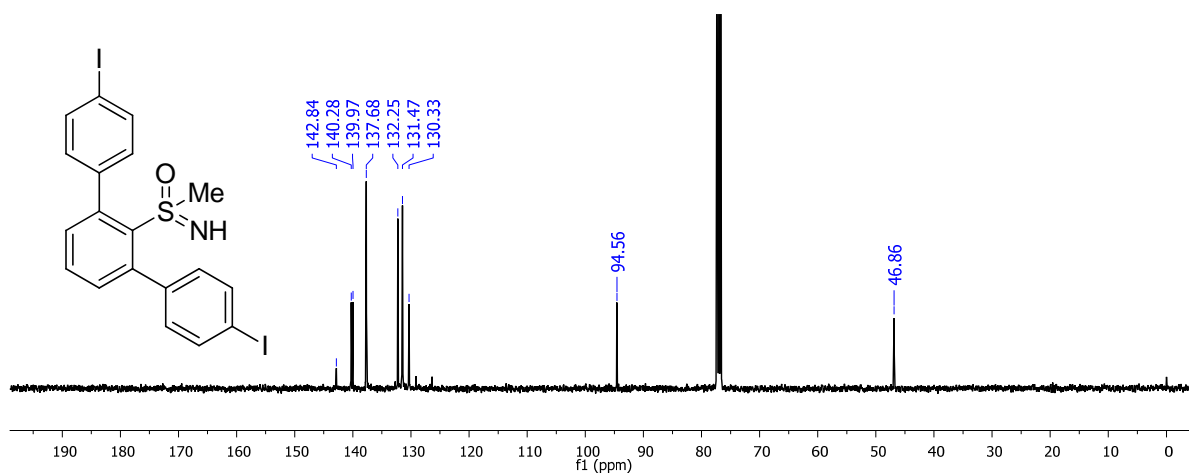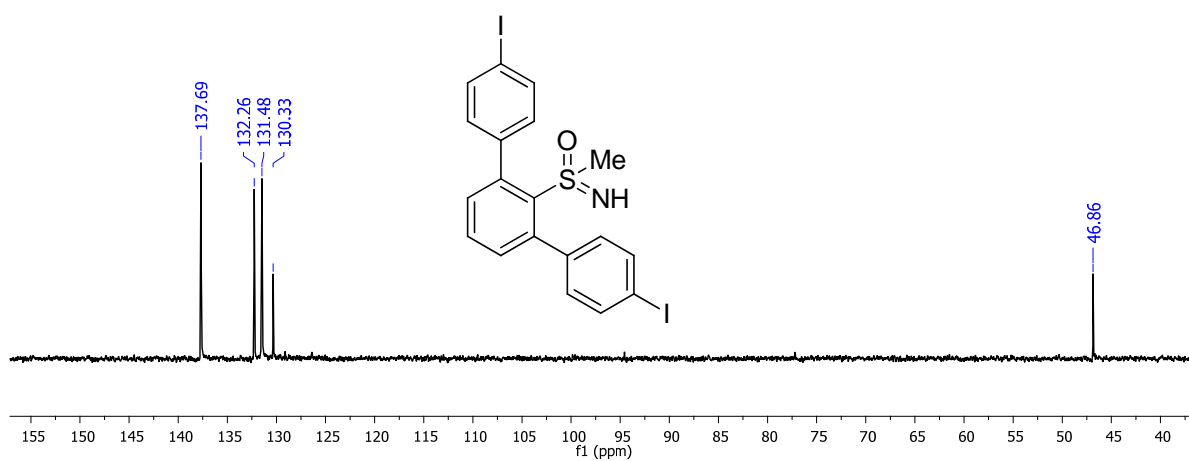

**4,4''-Bromo-2'-(*S*-methylsulfonylimidoyl)-1,1':3',1''-terphenyl (5ae).**

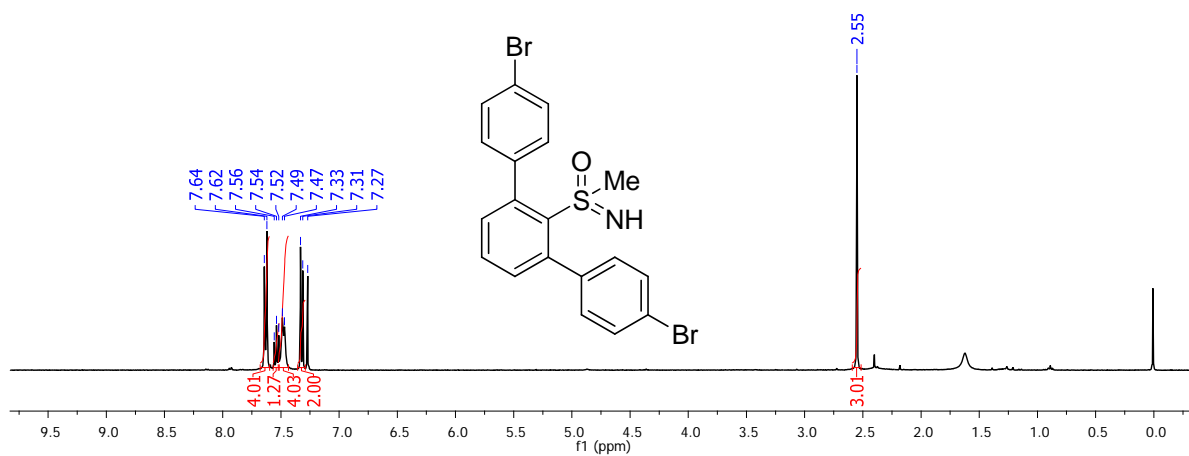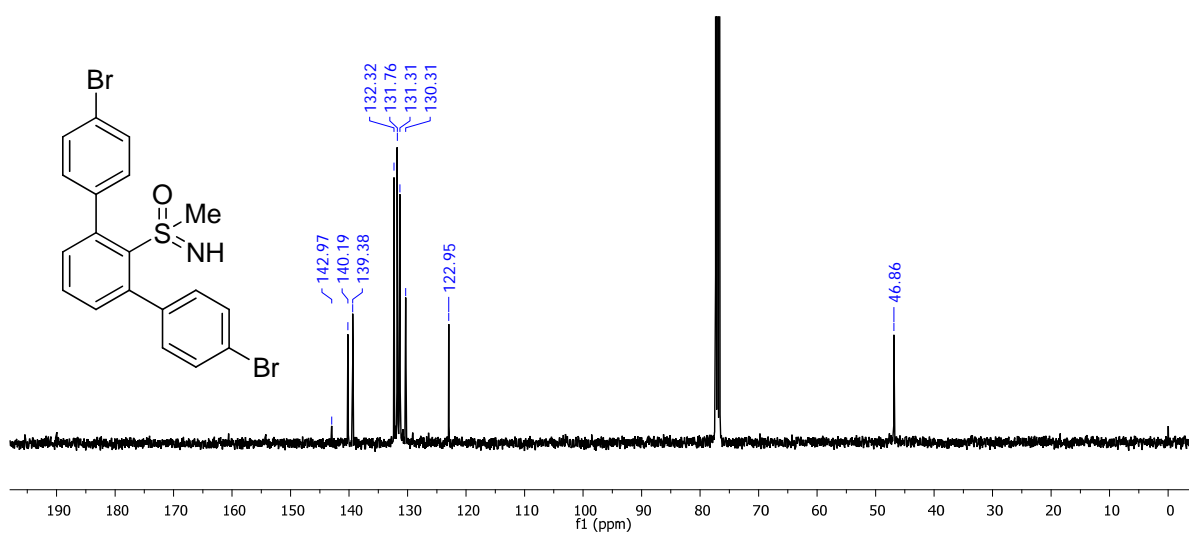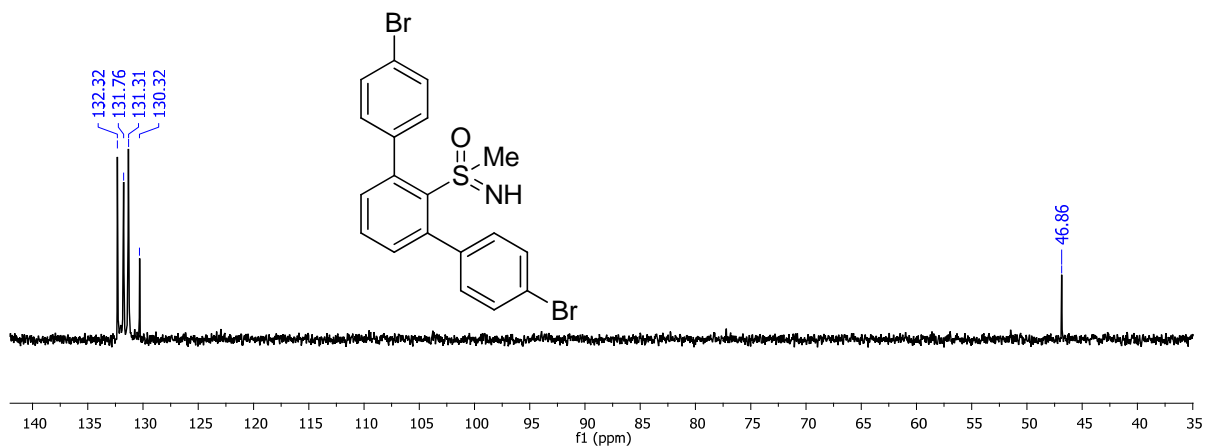

4,4''-Dichloro-2'-(*S*-methylsulfonimidoyl)-1,1':3',1''-terphenyl (5af).

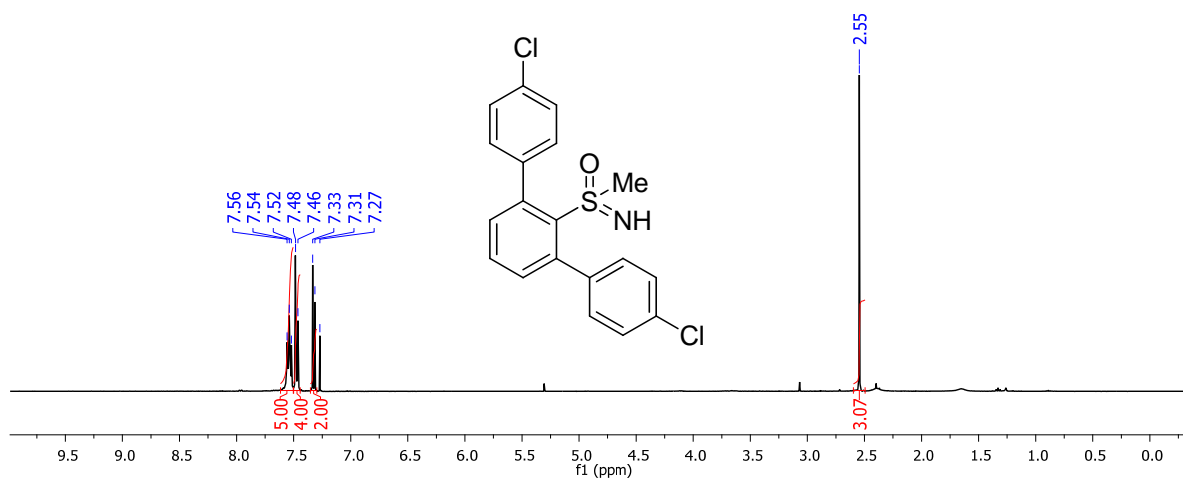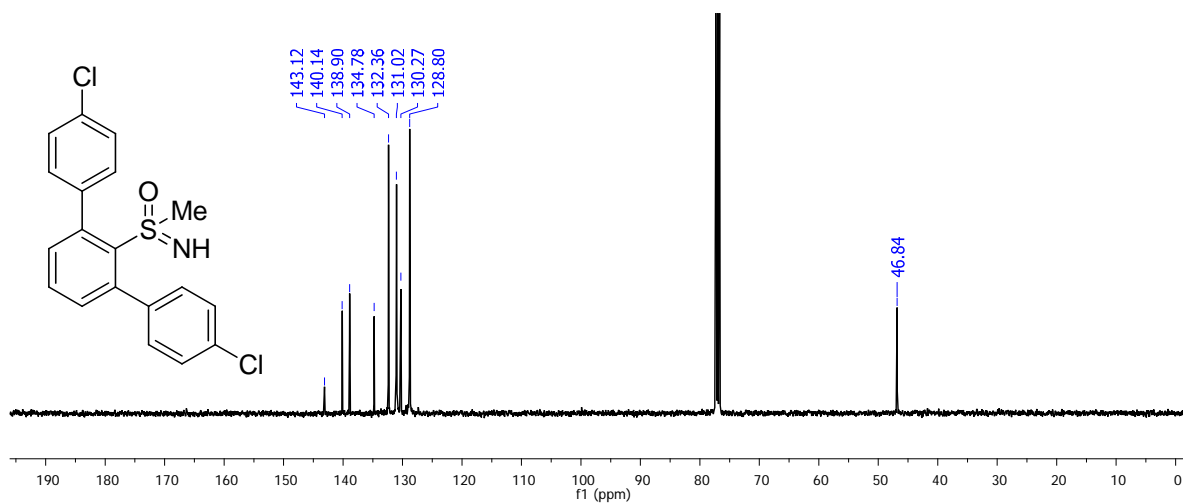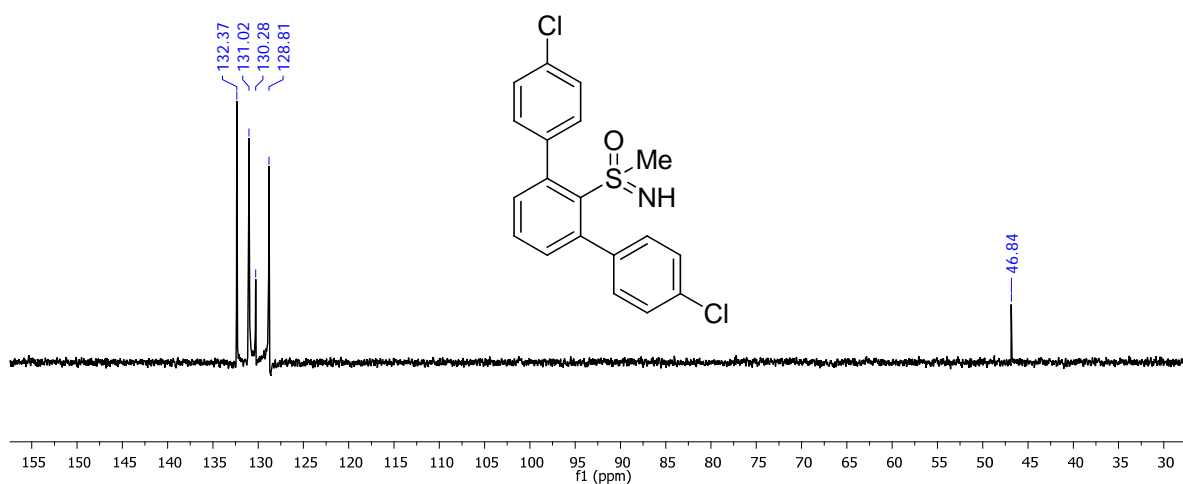

4,4''-Difluoro-2'-(*S*-methylsulfonimidoyl)-1,1':3',1''-terphenyl (5ag).

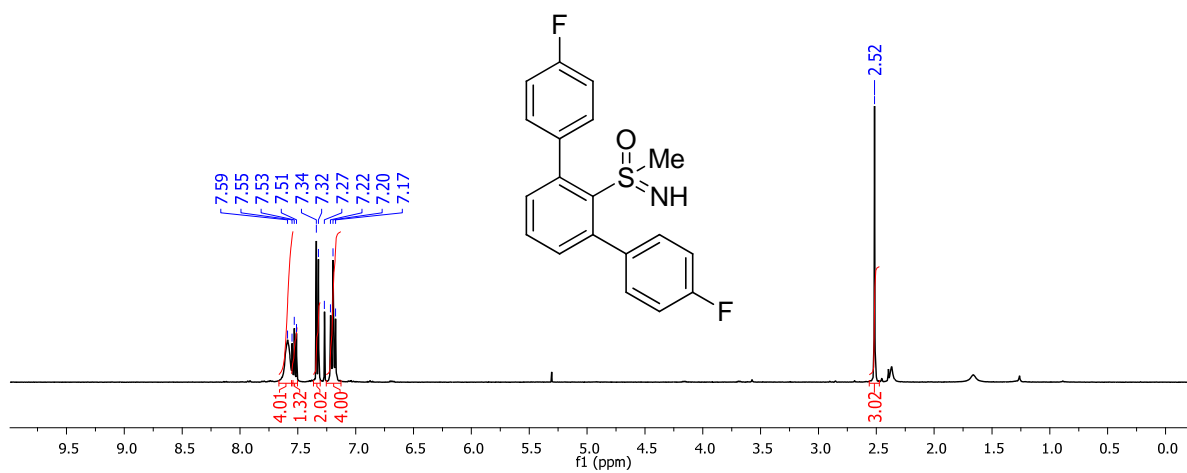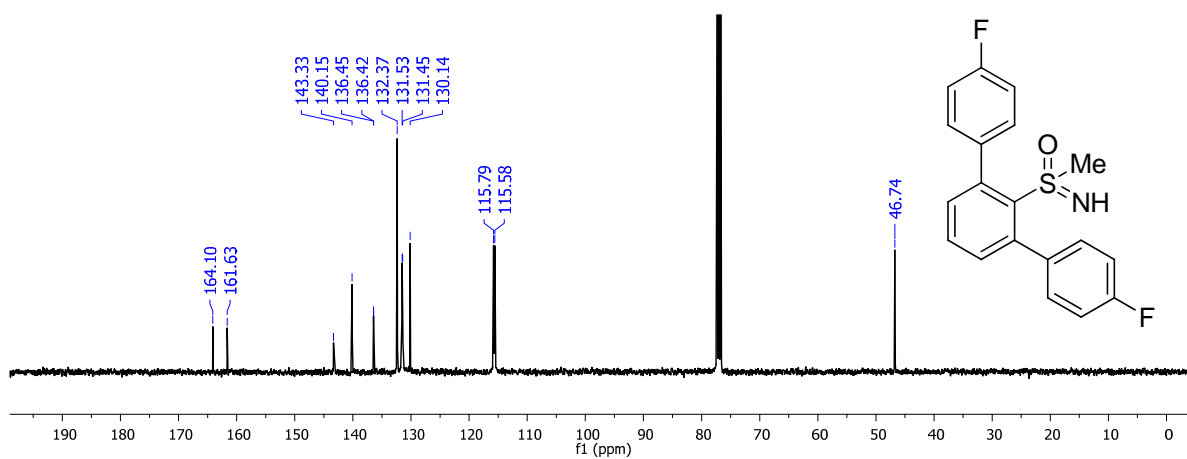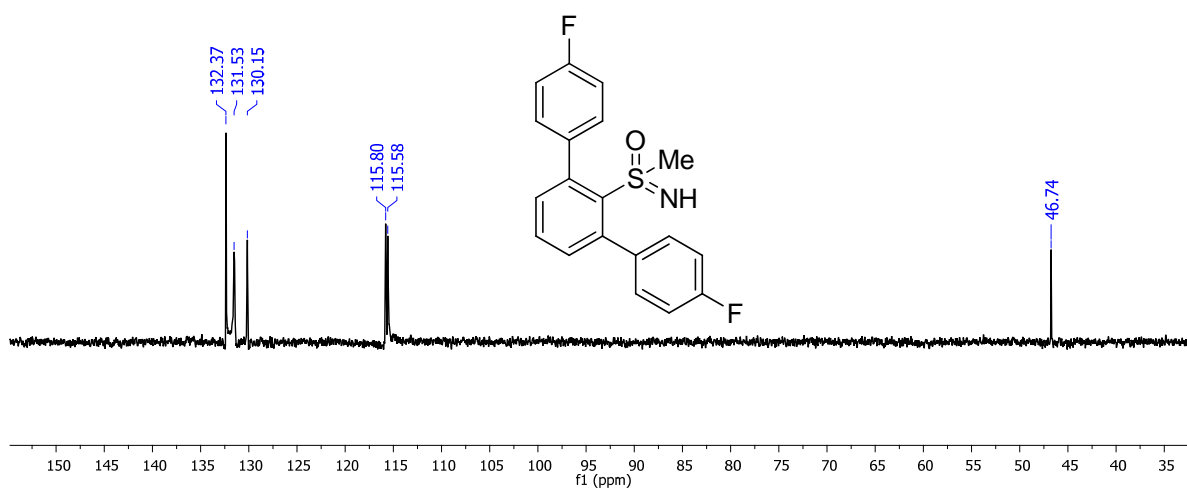

**3,3''-Dibromo-2'-(S-methylsulfonimidoyl)-1,1':3',1''-terphenyl (5ah).**

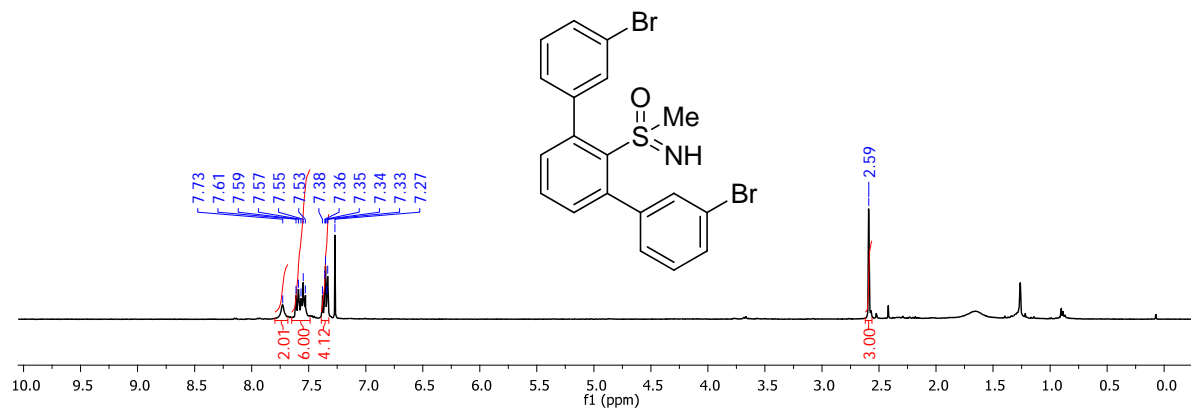

**5,5'-(2-(S-Methylsulfonimidoyl)-1,3 phenylene) Bis(benzo[d][1,3]dioxole) (5ai).**

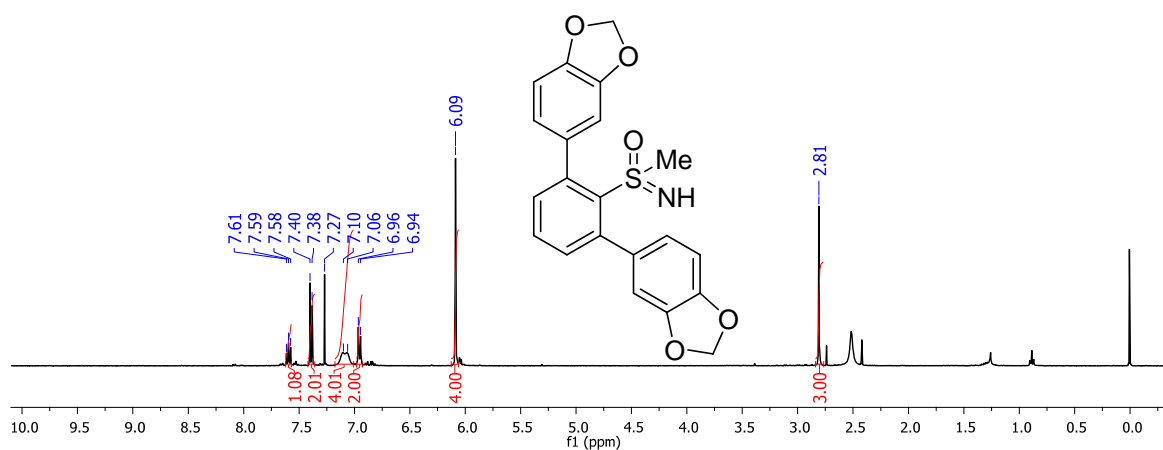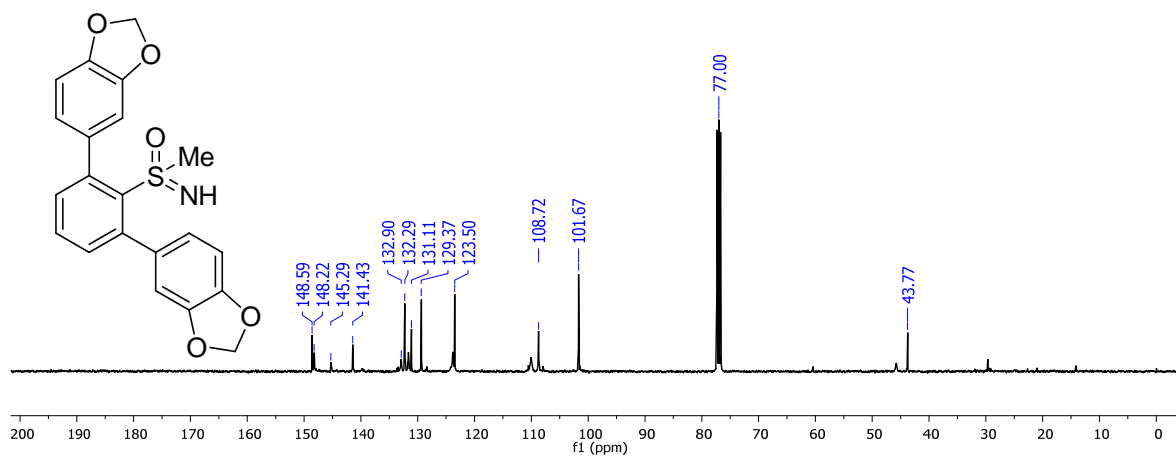



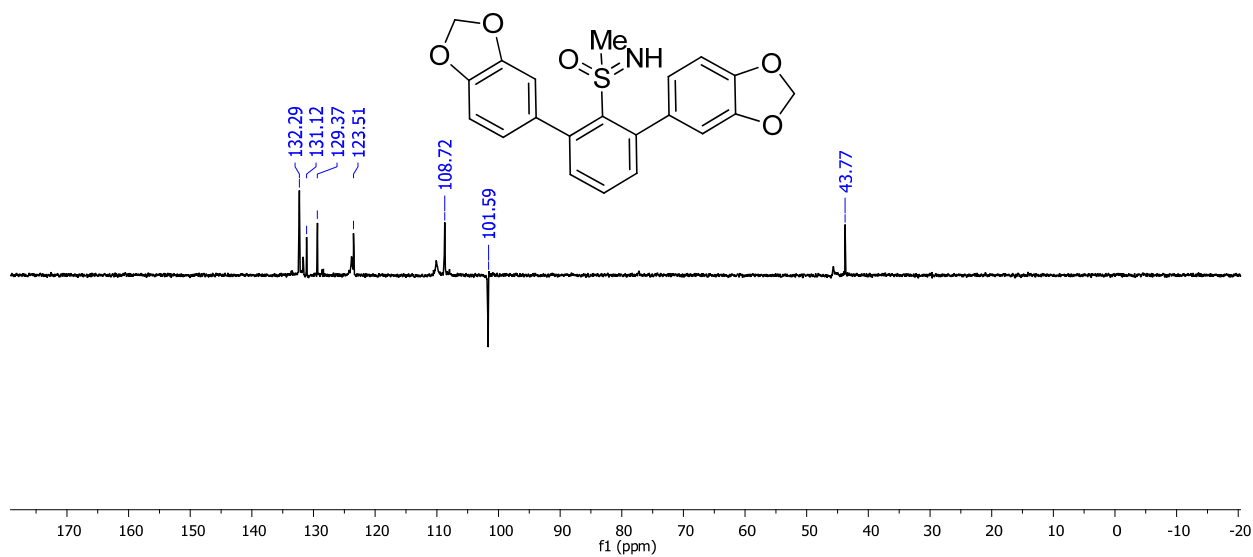

# 2,2'-(2-(S-methylsulfonimidoyl)-1,3-phenylene)dinaphthalene (5aj).

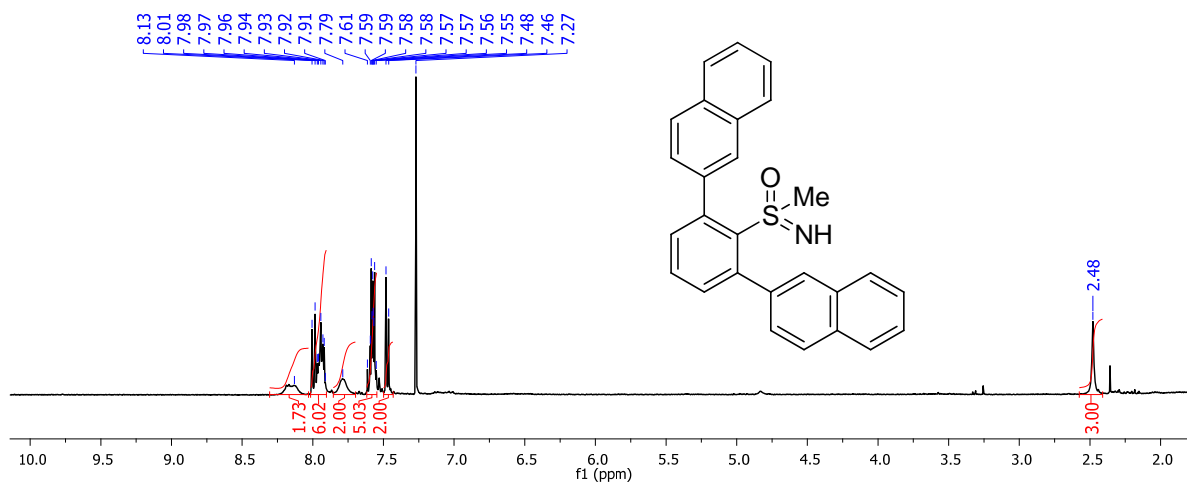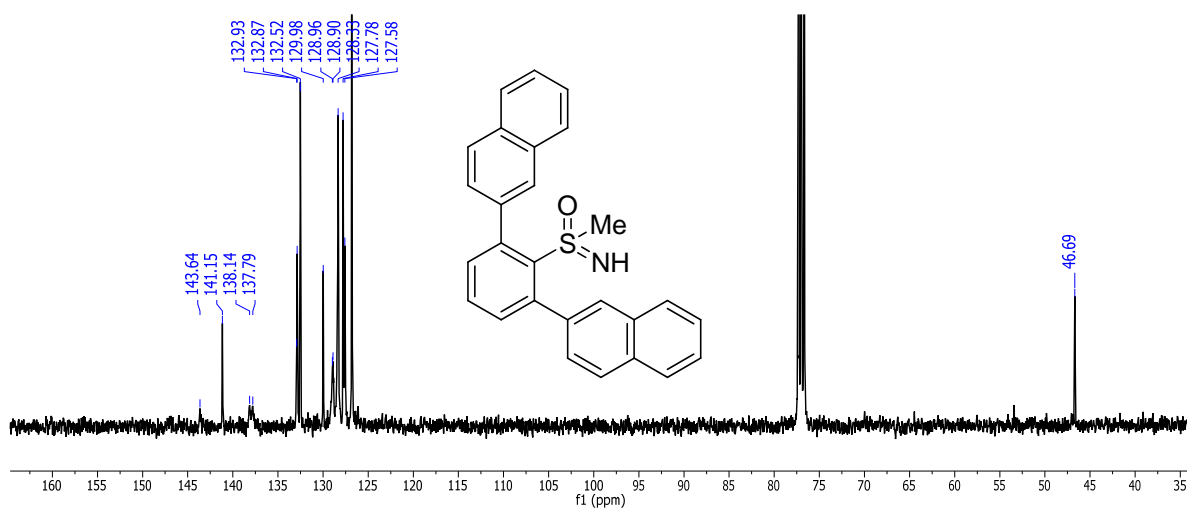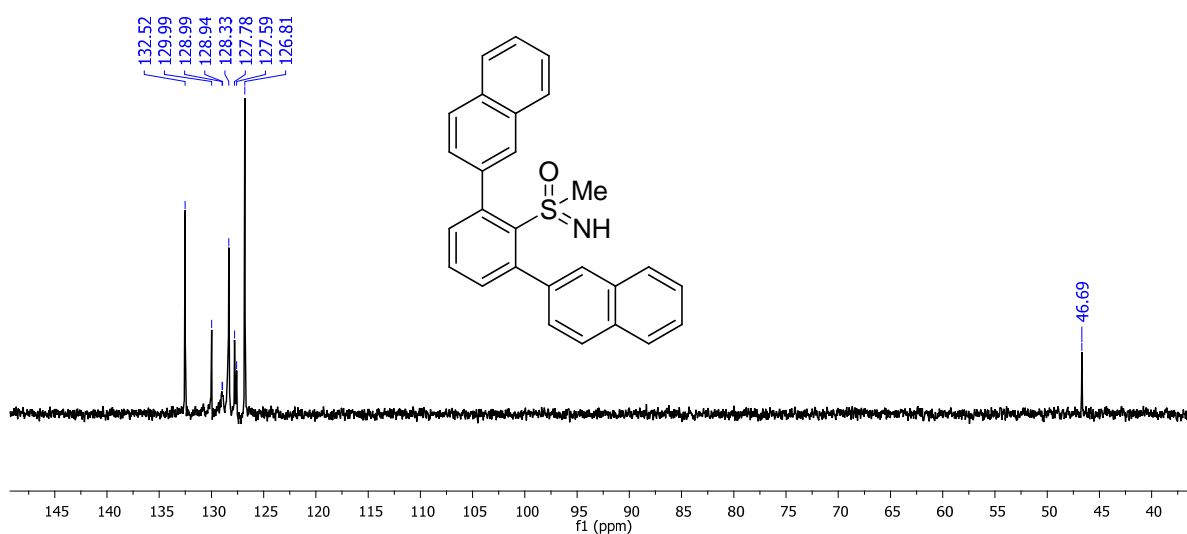

**5'-Methyl-2'-(S-methylsulfonimidoyl)-1,1':3',1''-terphenyl (5ba).**

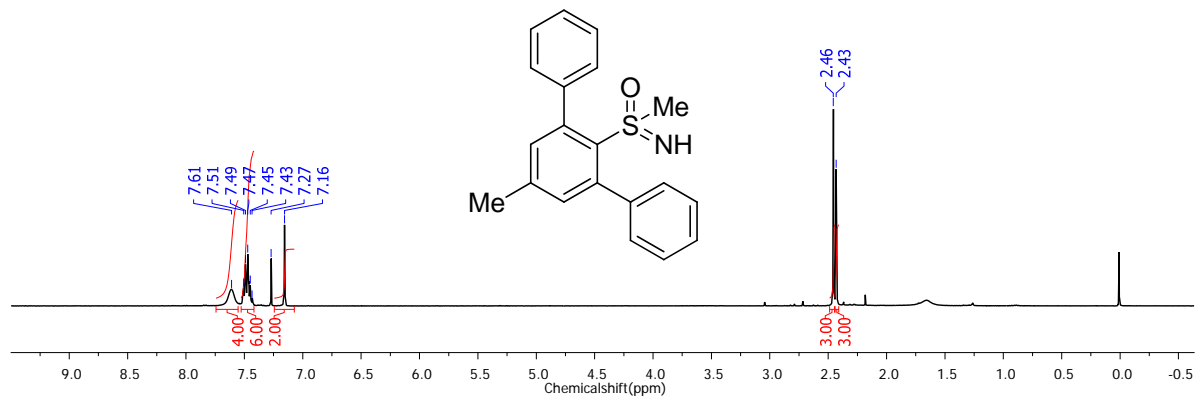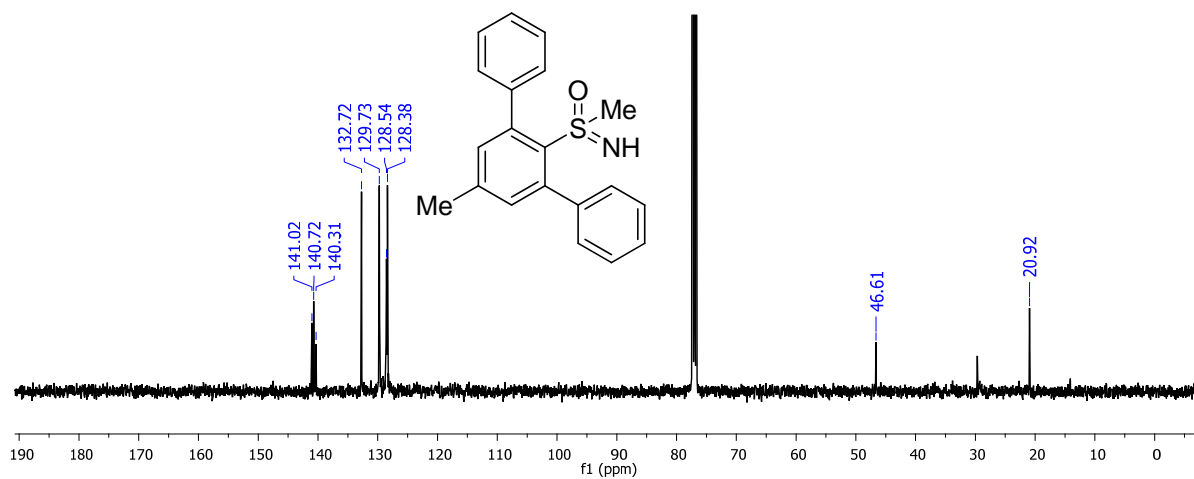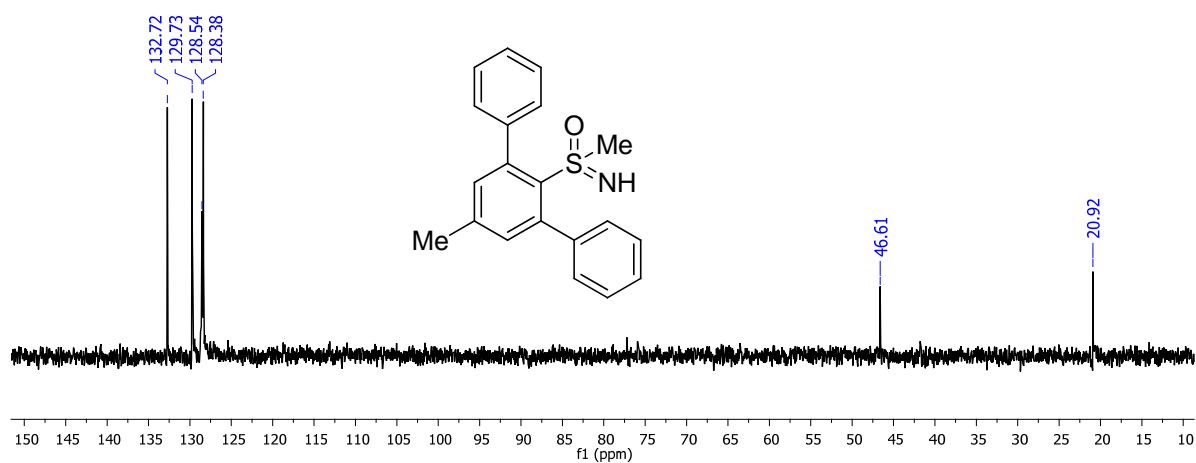

**5'-Bromo-2'-(S-methylsulfonimidoyl)-1,1':3',1''-terphenyl (5ca).**

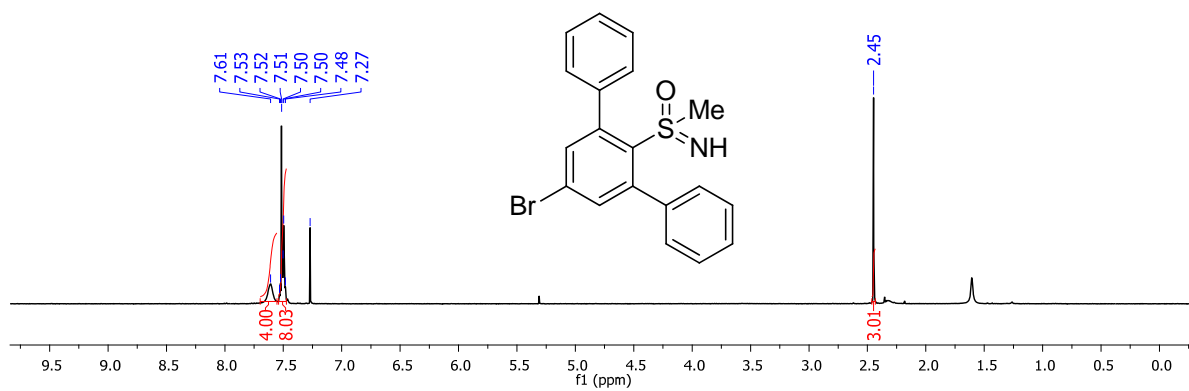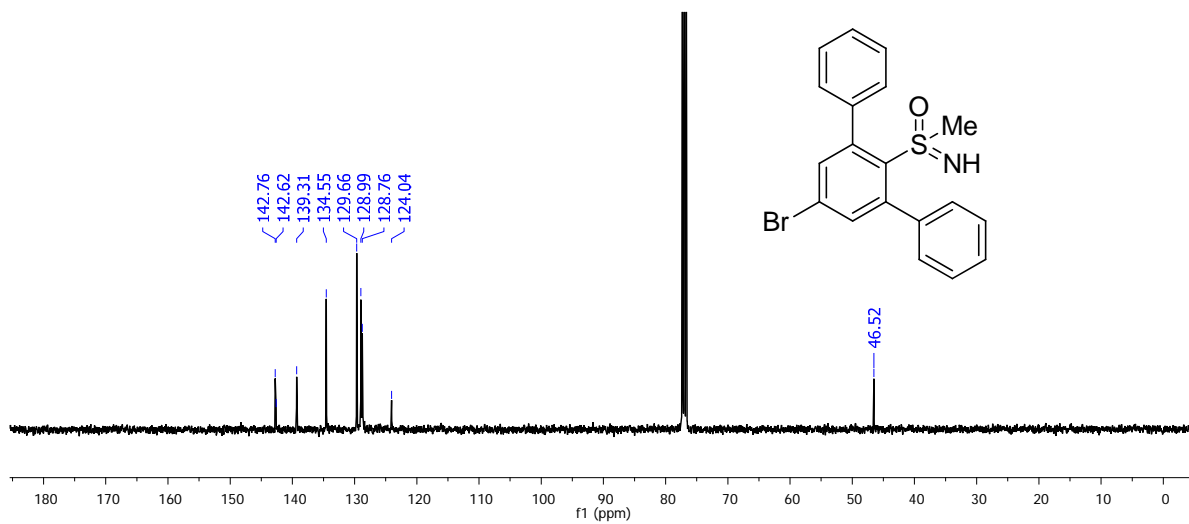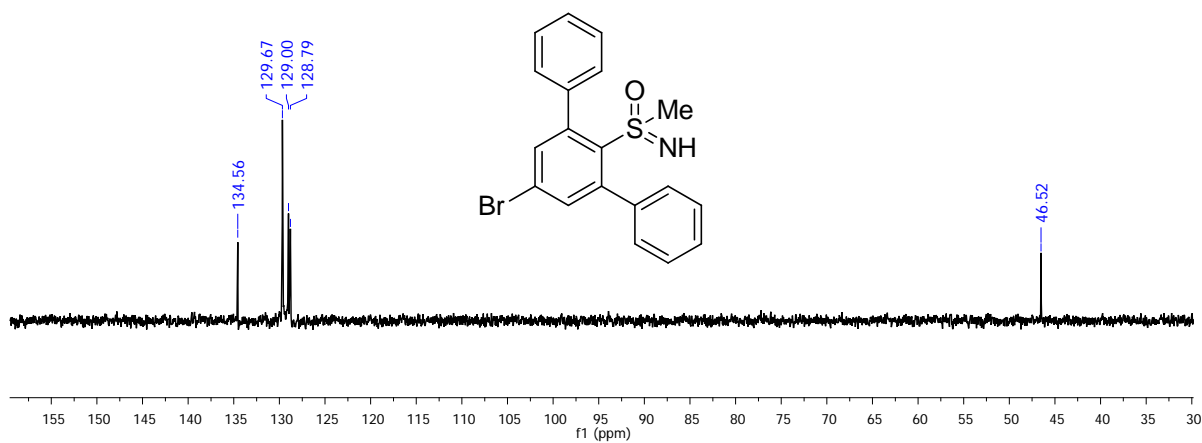

2'-(S-Methylsulfonimidoyl)-5'-nitro-1,1':3',1''-terphenyl (5da).

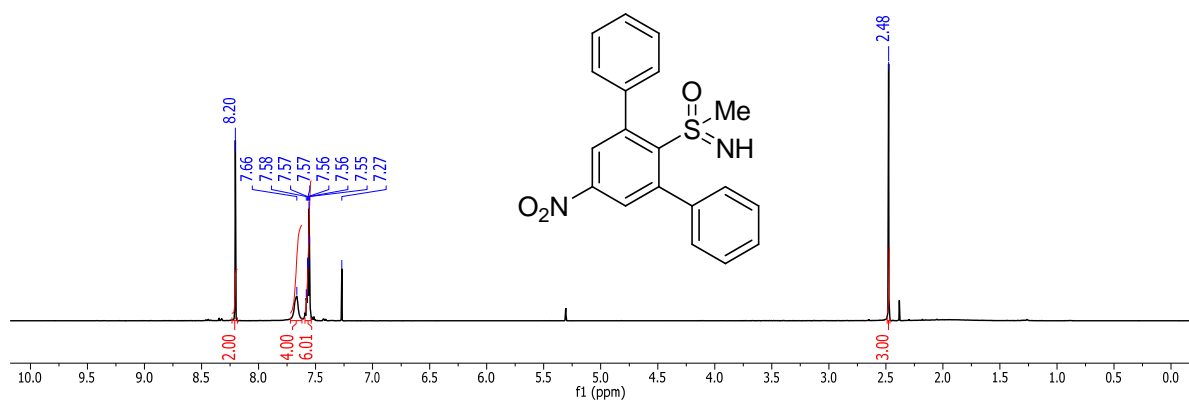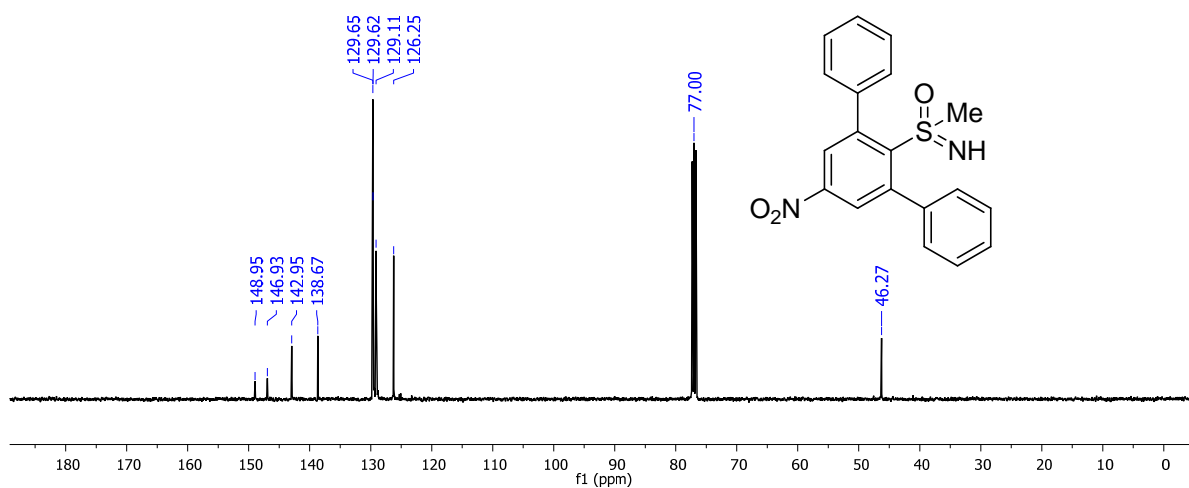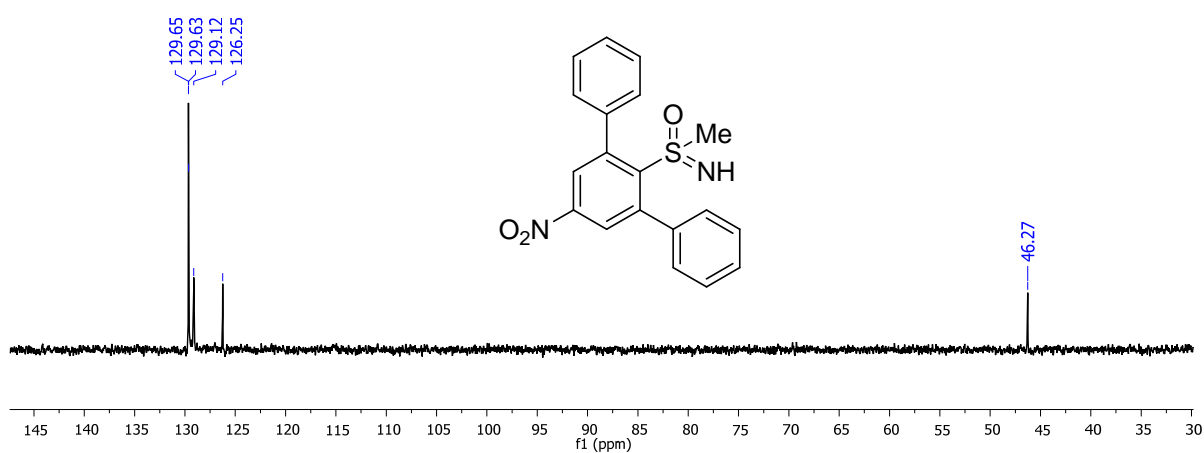

5'-chloro-4,4''-dimethoxy-2'-(S-methylsulfonimidoyl)-1,1':3',1''-terphenyl (5ec).

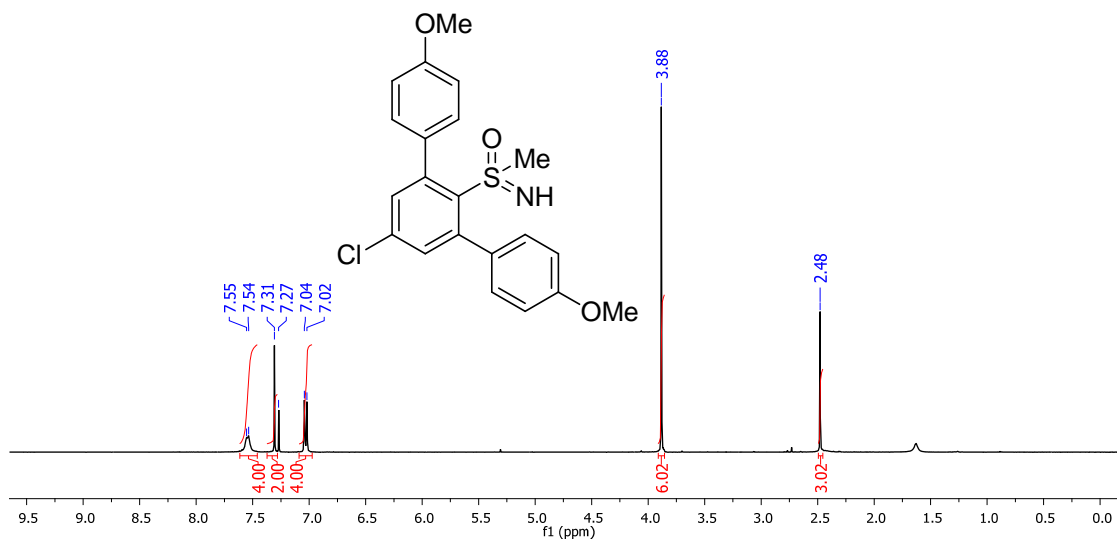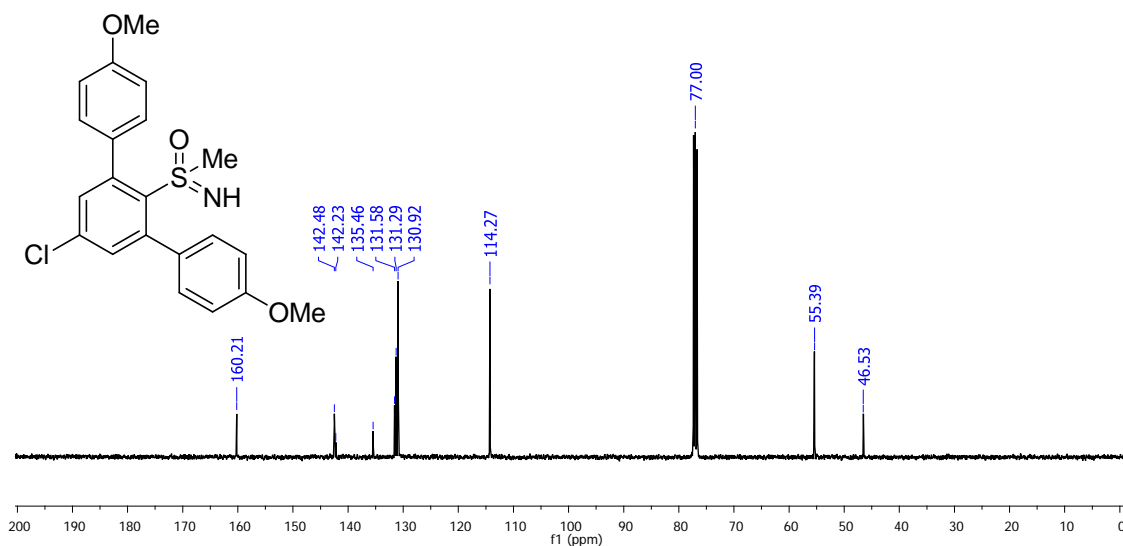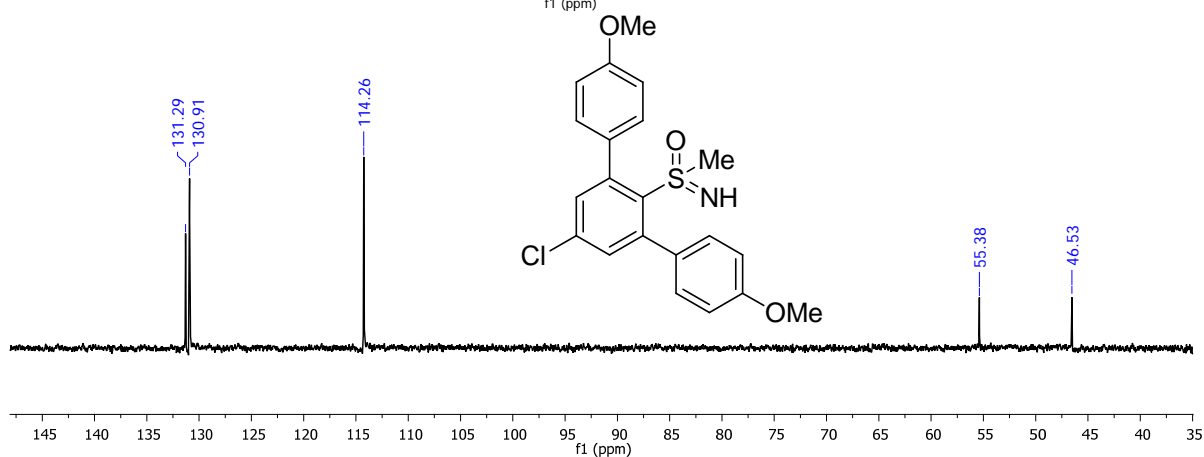

### 5'-Fluoro-4,4''-dimethoxy-2'-(S-methylsulfonimidoyl)-1,1':3',1''-terphenyl (5fc).

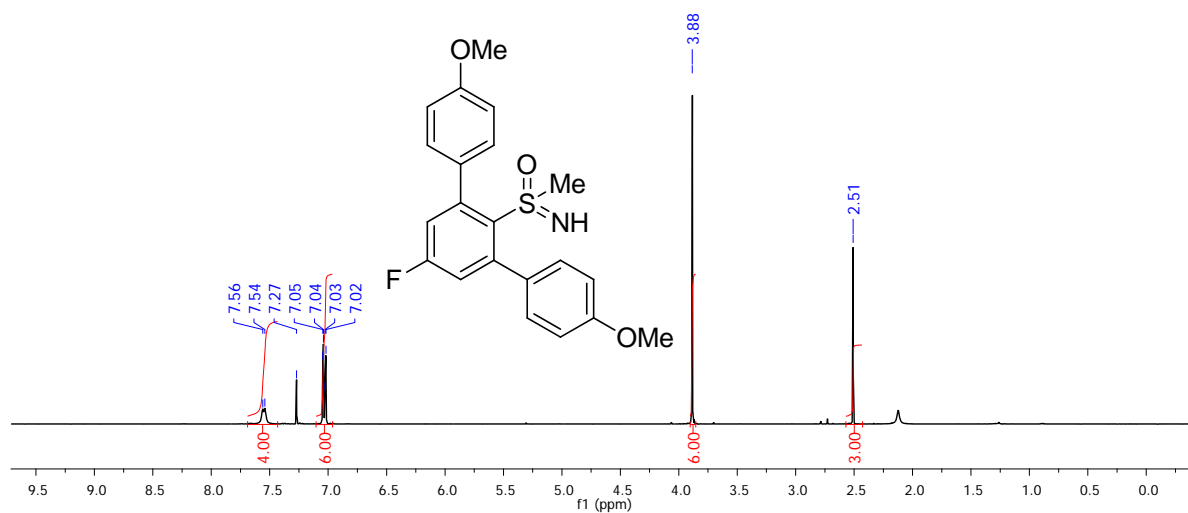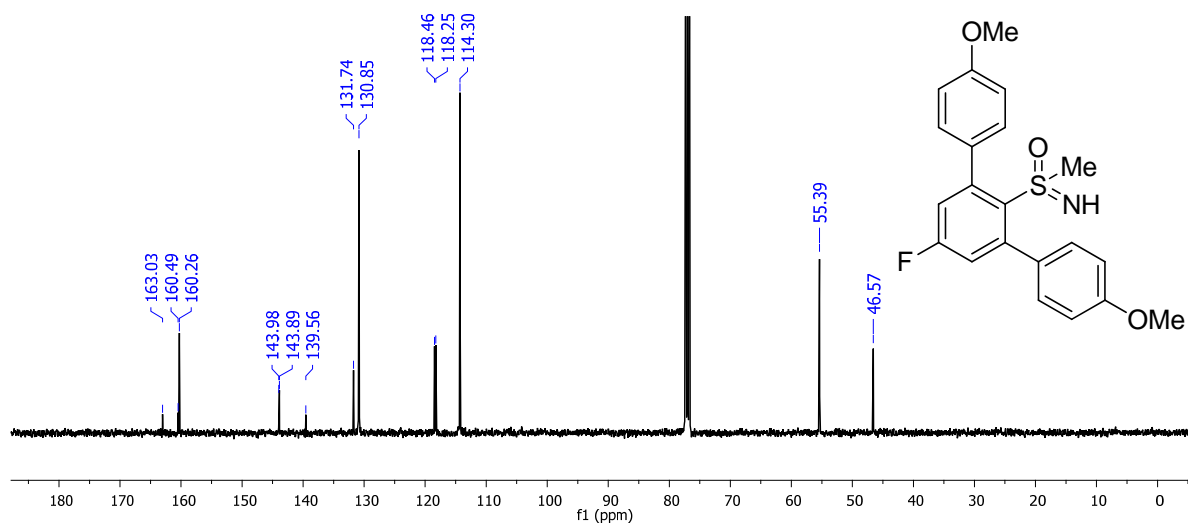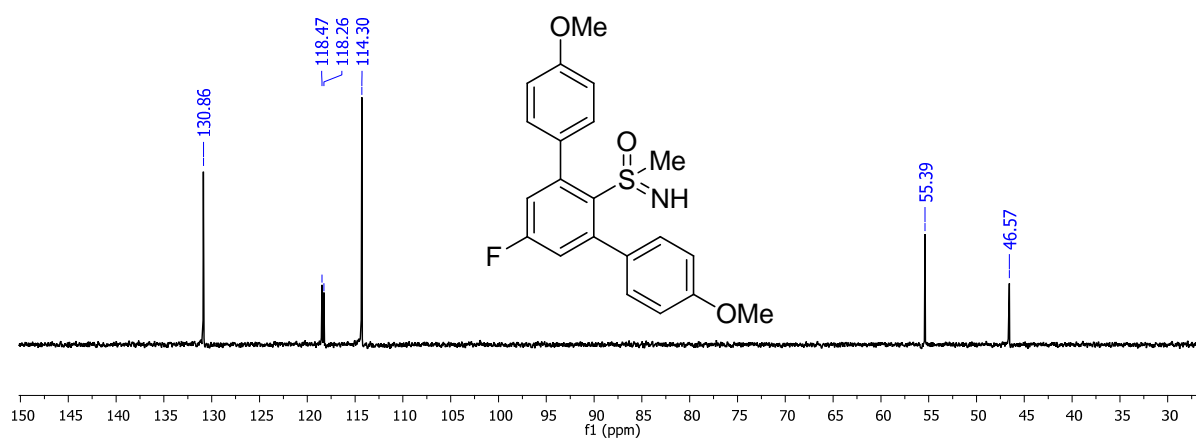

# 2'-(Ethylsulfonimidoyl)-1,1':3',1''-terphenyl (5ga).

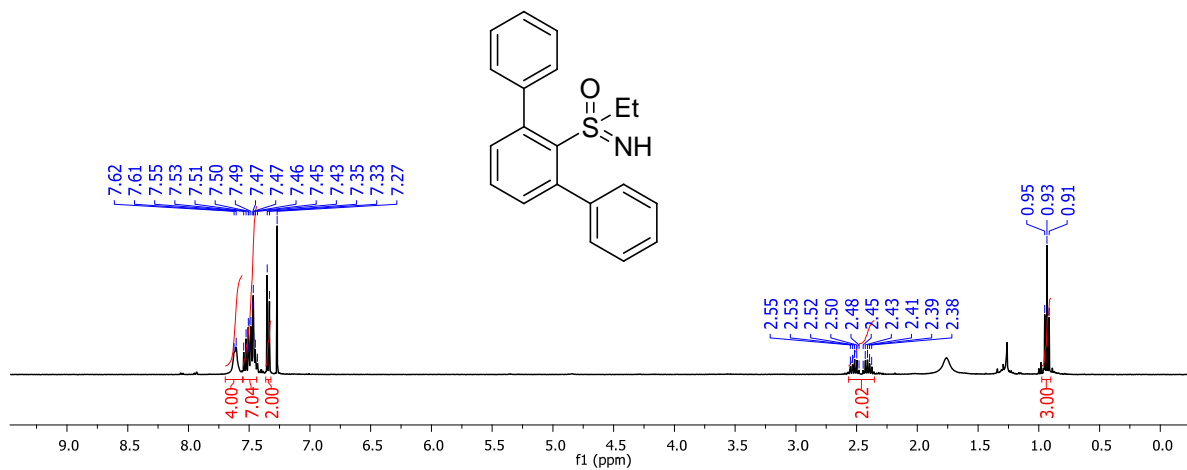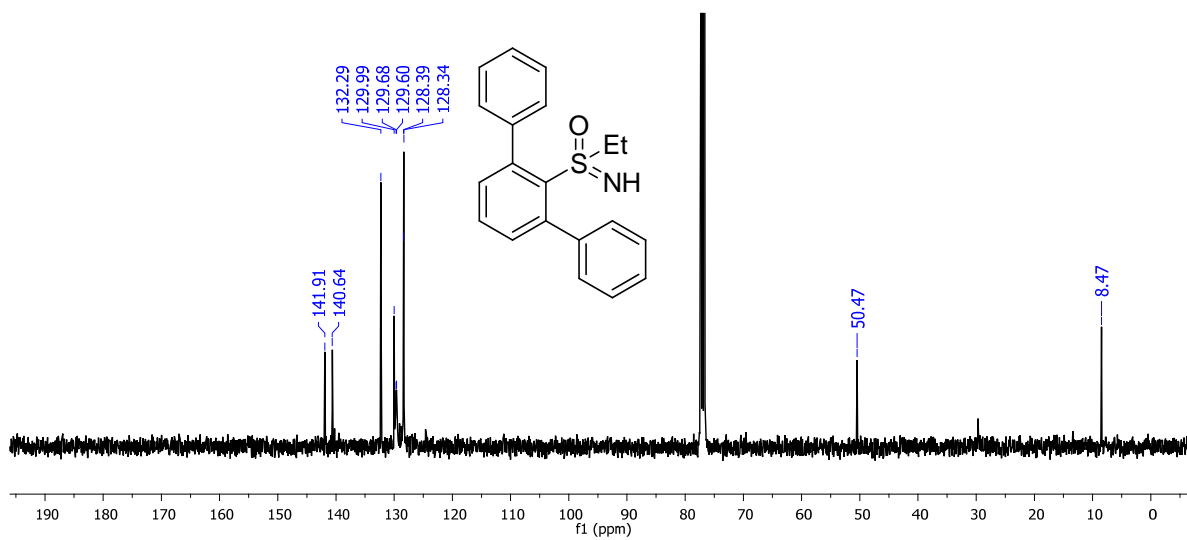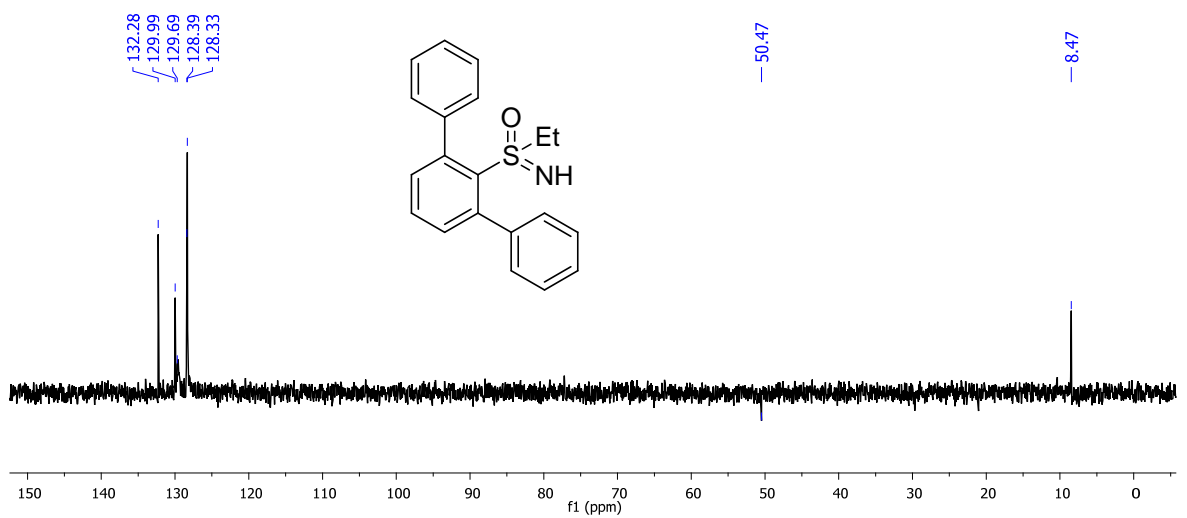



### 3-Methyl-2-(S-methylsulfonimidoyl)-1,1'-biphenyl (5ha).

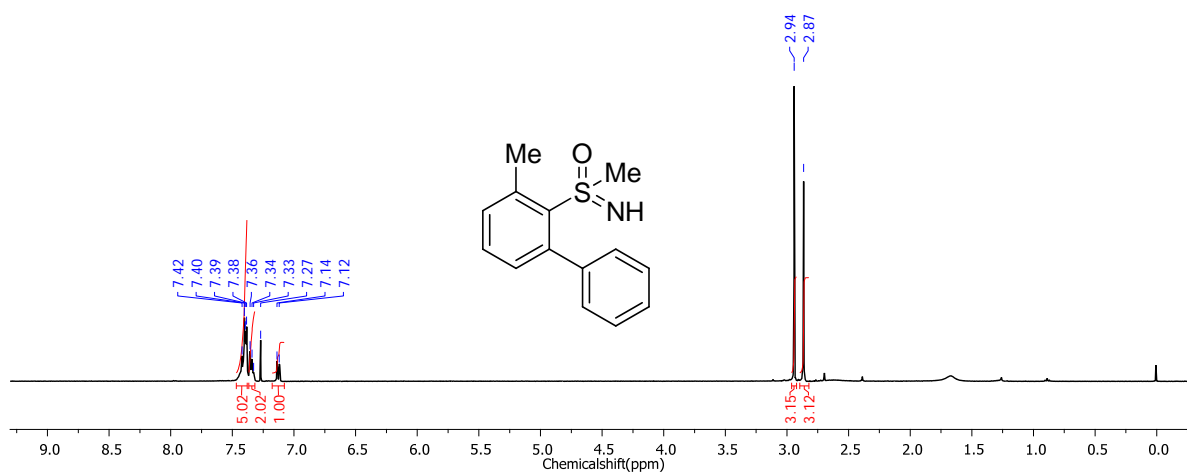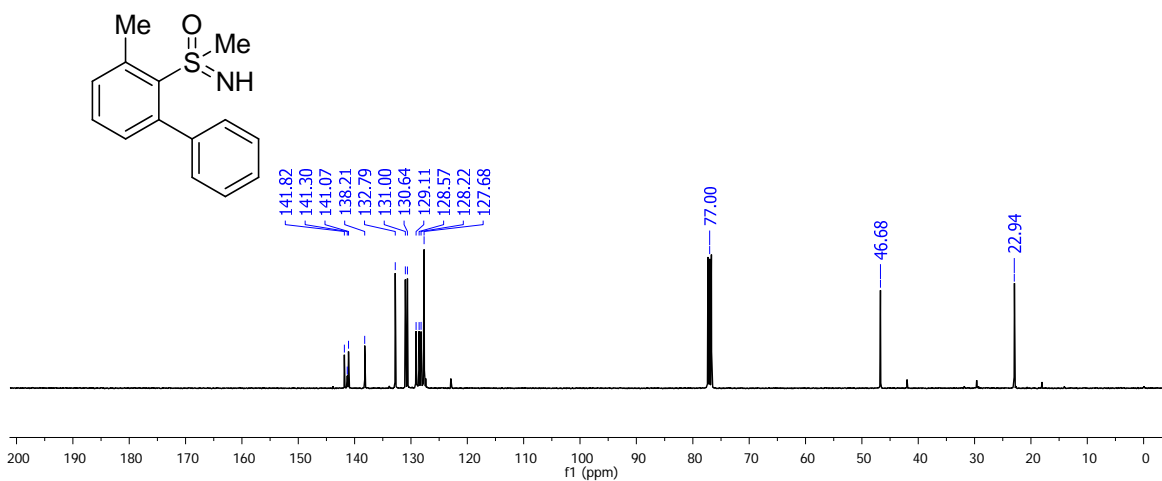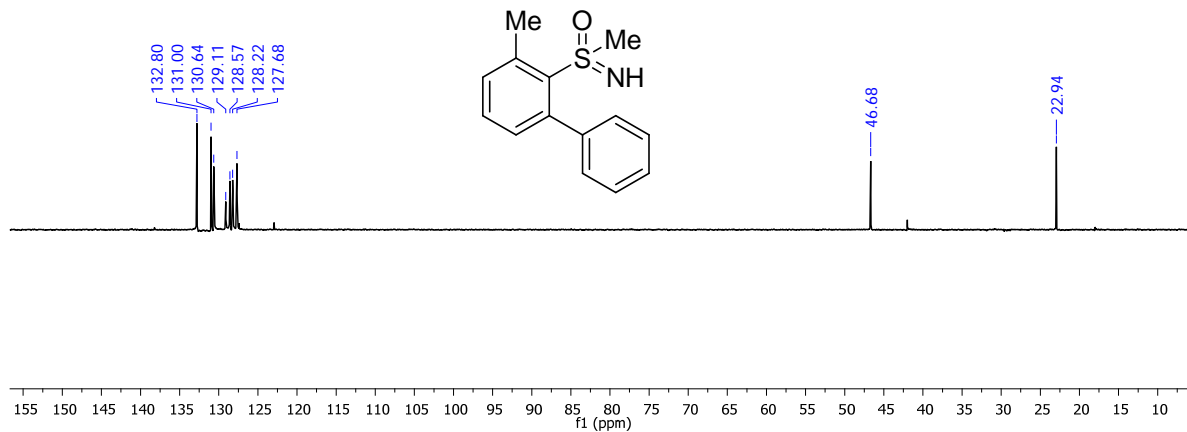

### 4'-Bromo-3-methyl-2-(S-methylsulfonimidoyl)-1,1'-biphenyl (5he).

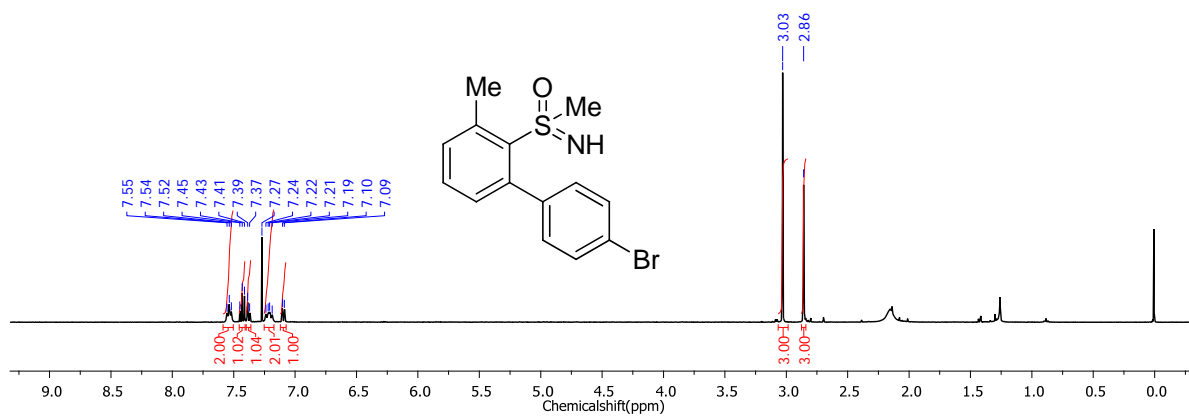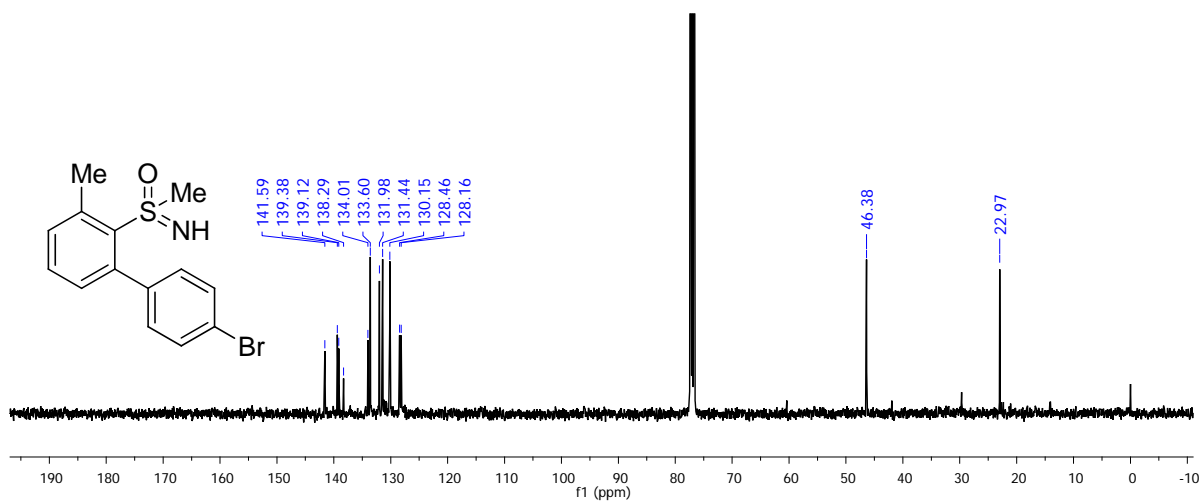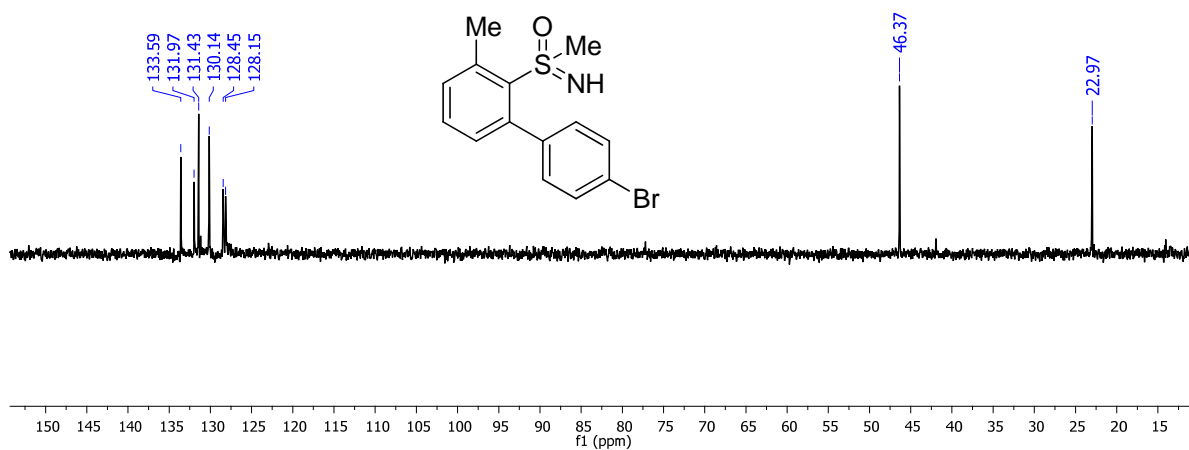

**4-Methyl-2-(S-methylsulfonimidoyl)-1,1'-biphenyl (and) 2-Methyl-6-(S-methylsulfonimidoyl)-1,1'-biphenyl (5ia and 5ia).**

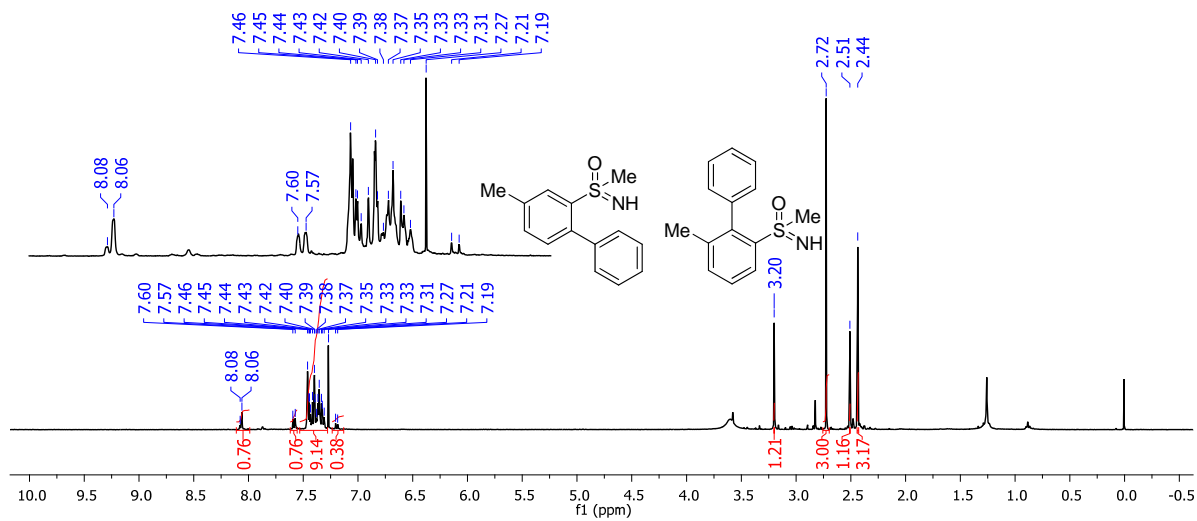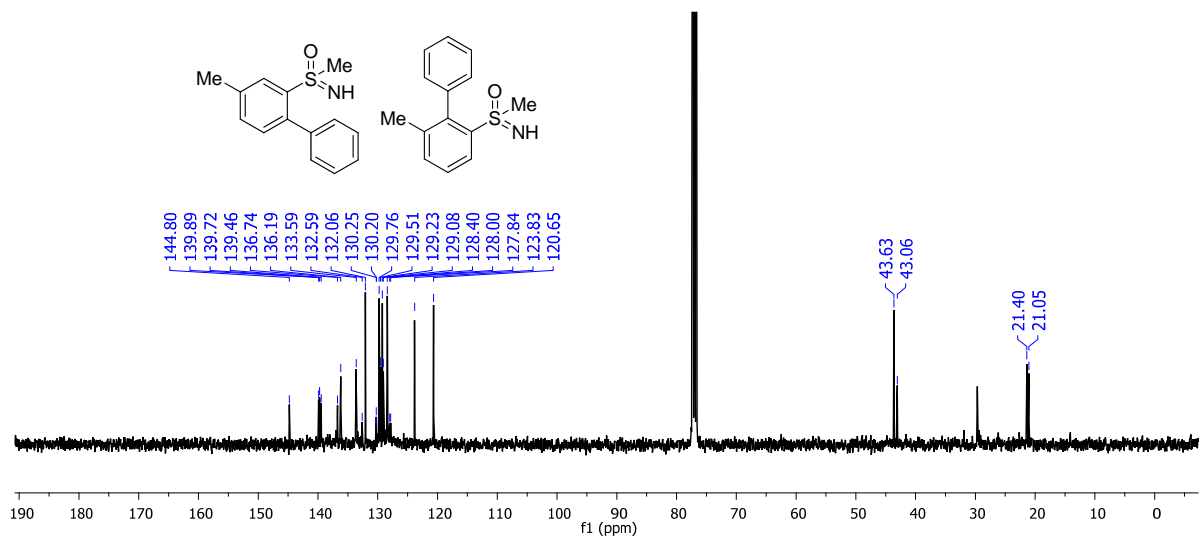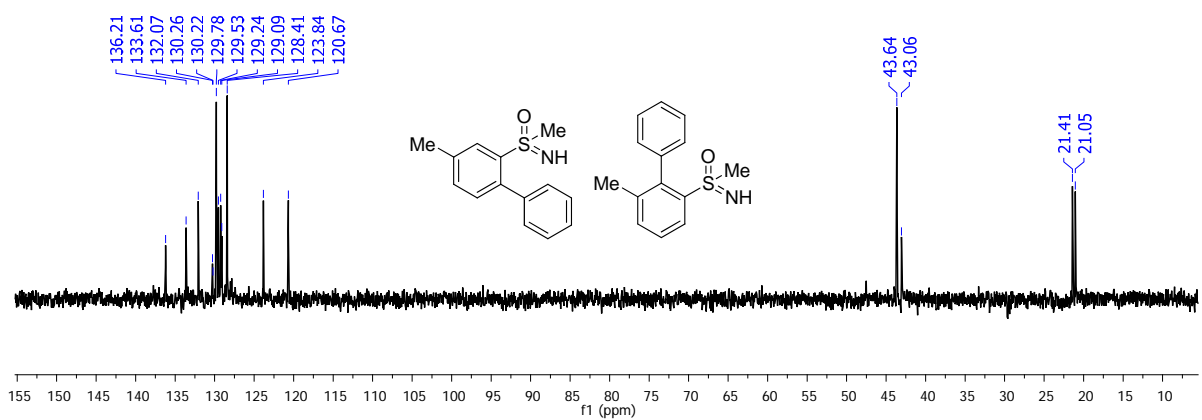

# 5-Methyl-4-phenyldibenzo[c,e][1,2]thiazine 5-oxide (6a).

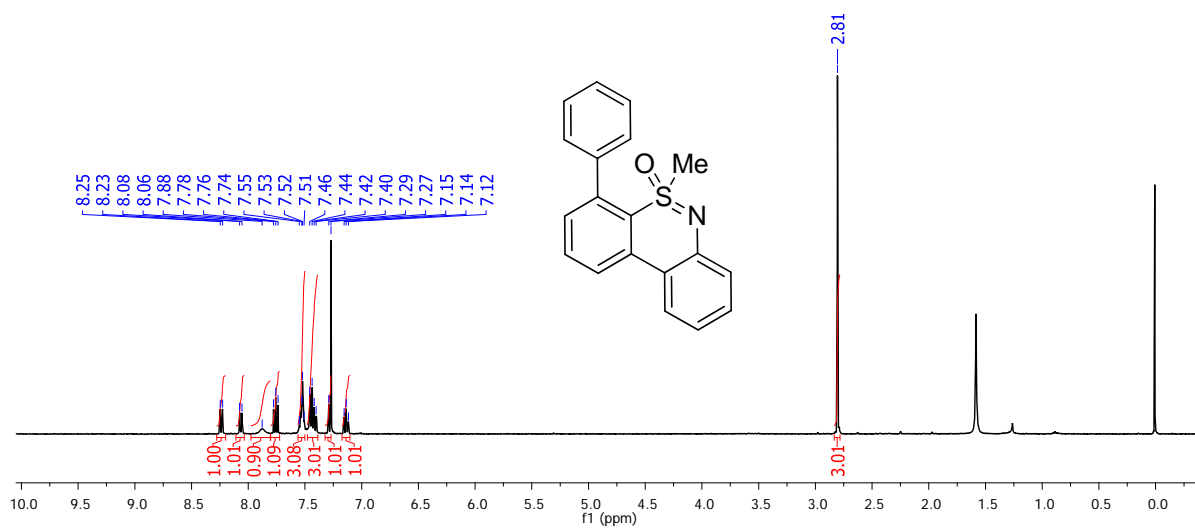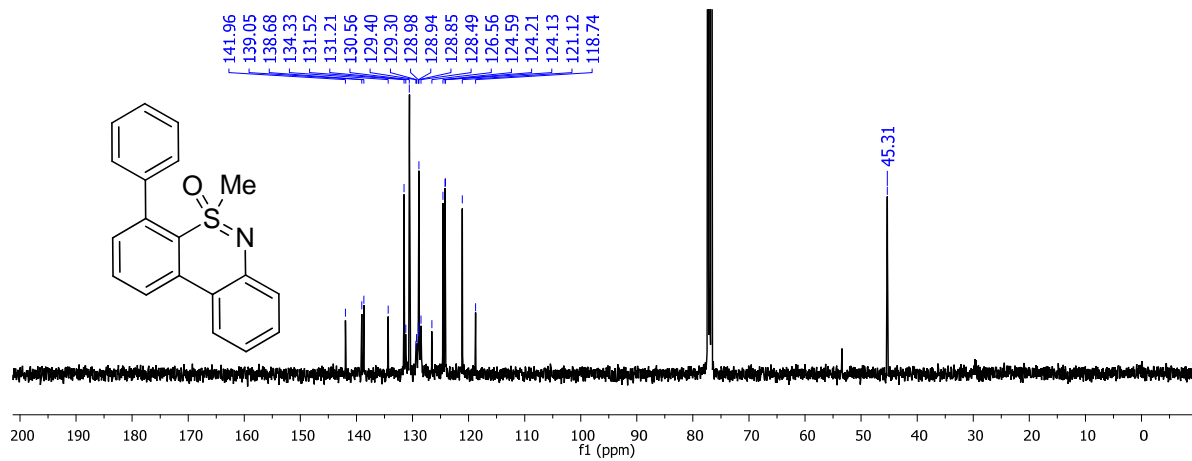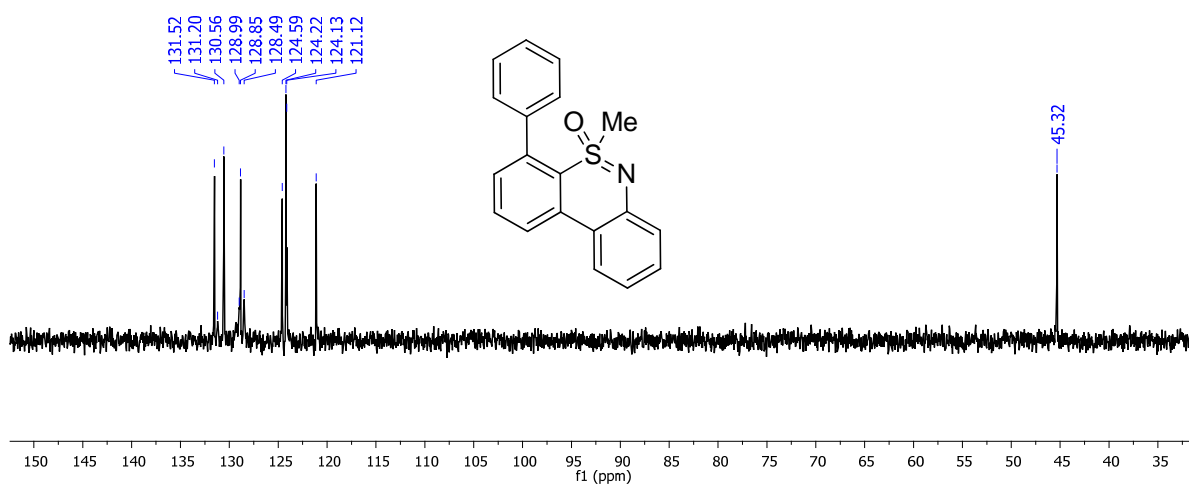

4-([1,1'-biphenyl]-4-yl)-5-methyl-8 phenyldibenzo[c,e][1,2]thiazine 5-oxide (6b).

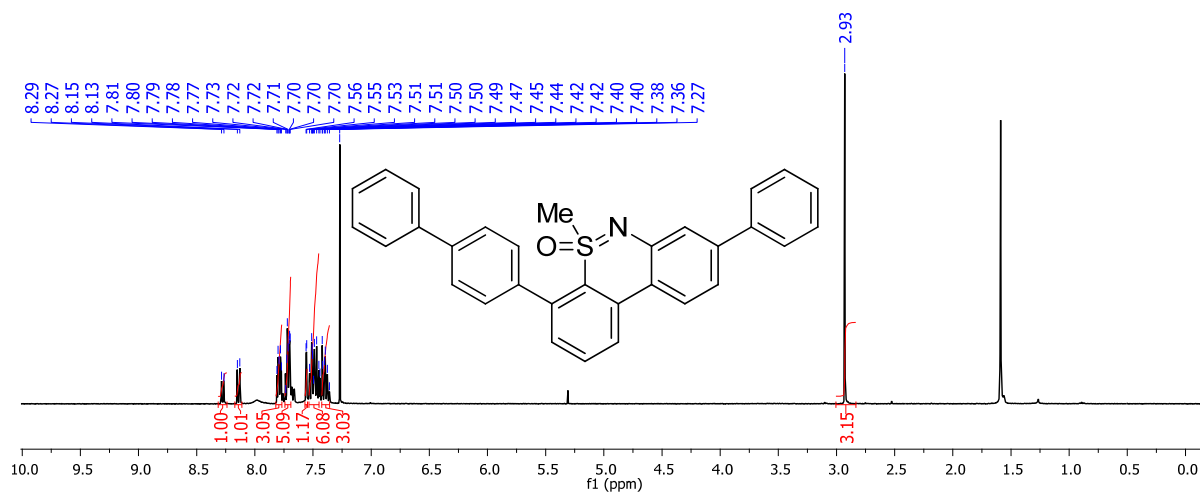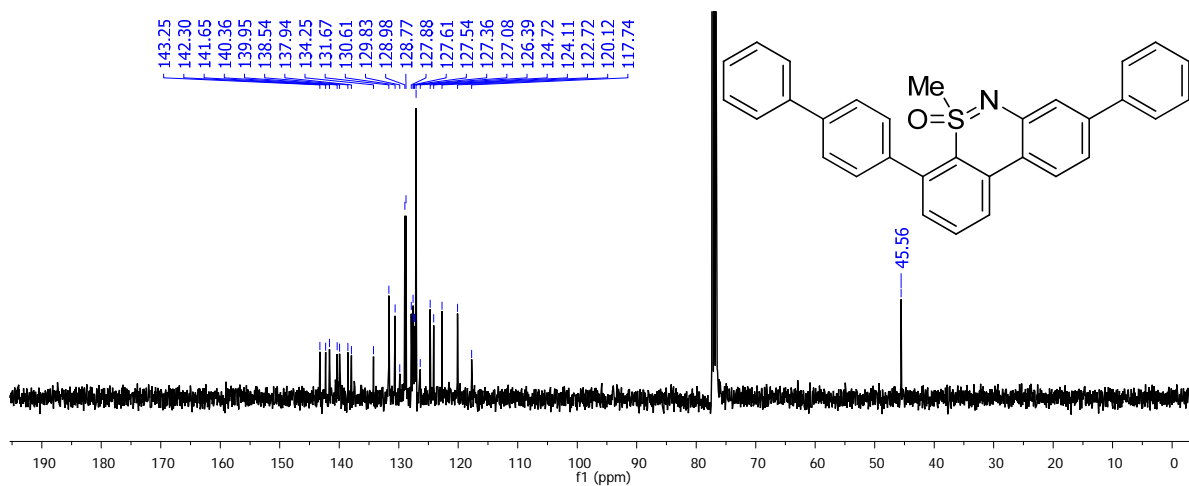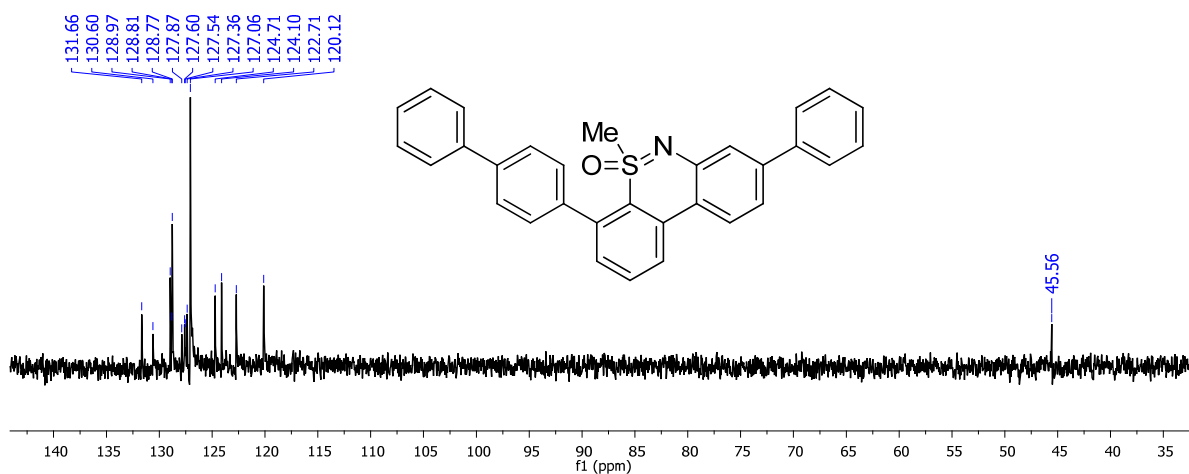

**8-Methoxy-4-(4-methoxyphenyl)-5-methyldibenzo[c,e][1,2]thiazine 5-oxide (6c).**

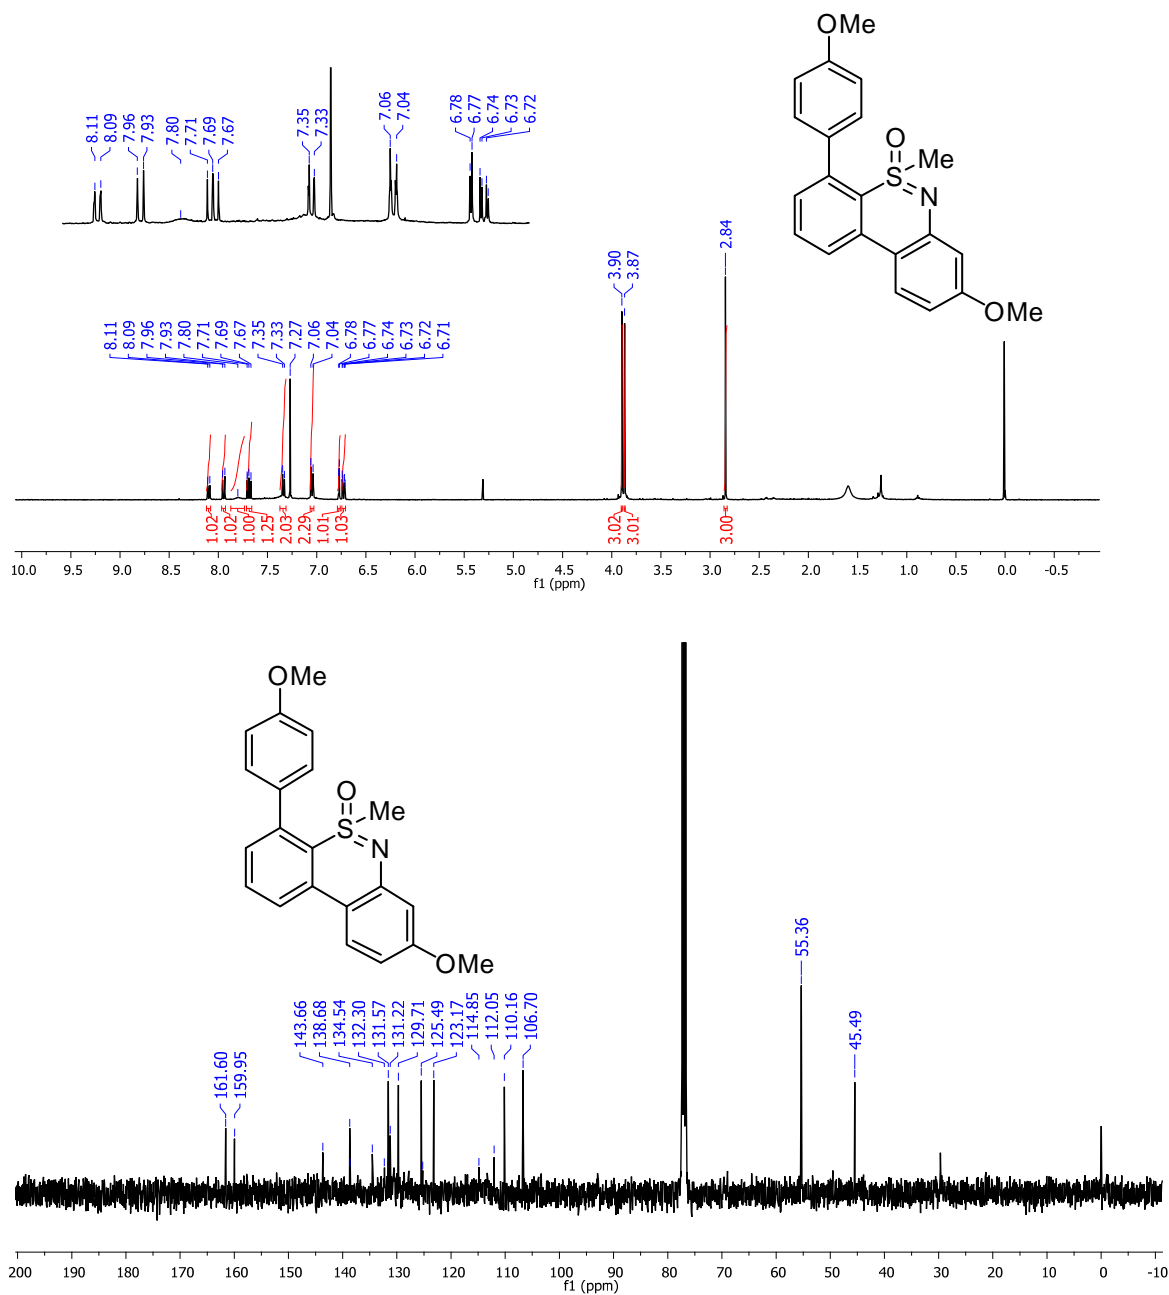

**8-Iodo-4-(4-iodophenyl)-5-methyldibenzo[c,e][1,2]thiazine 5-oxide (6d).**

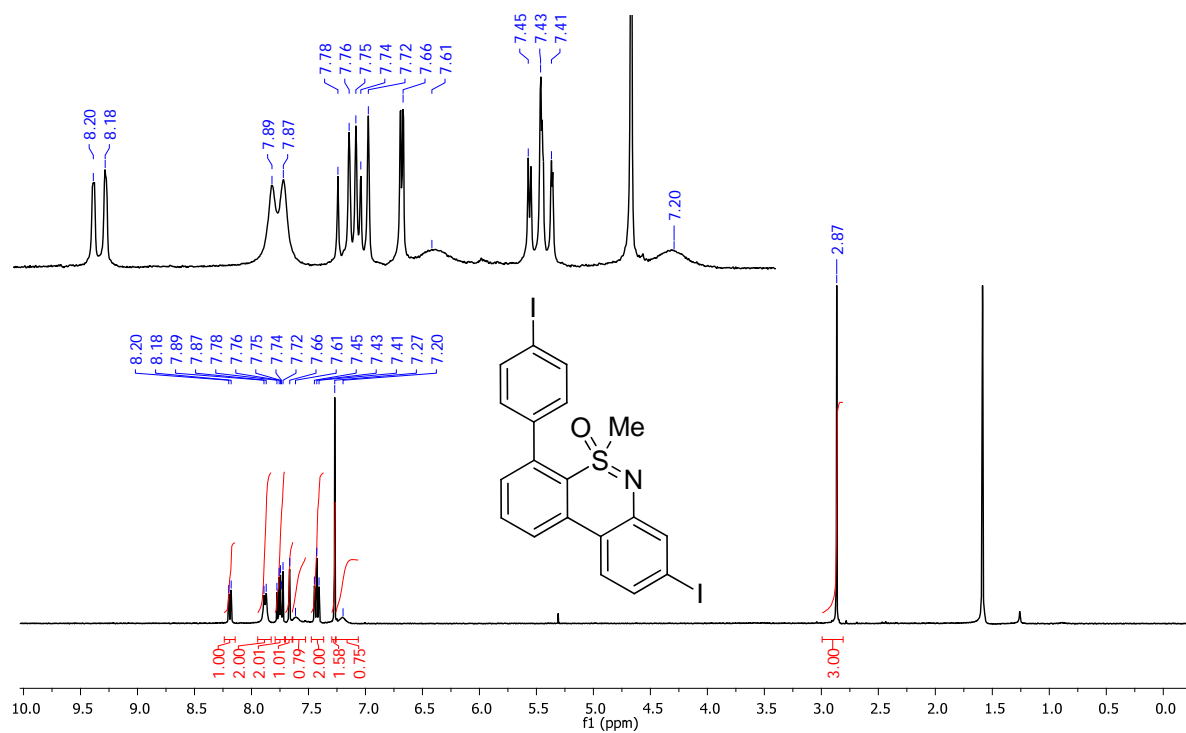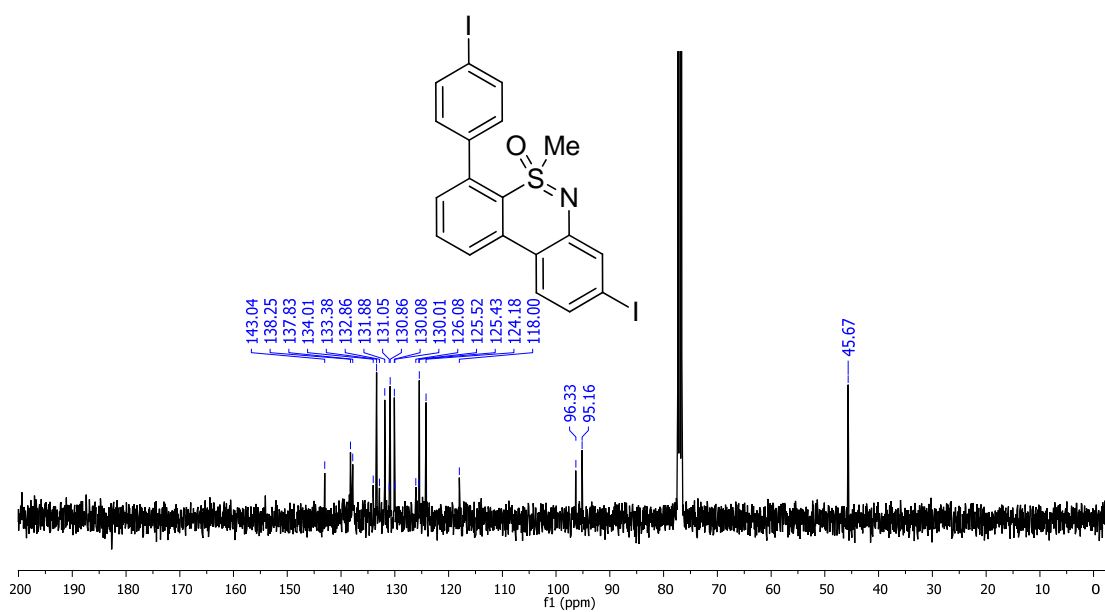

8-Bromo-4-(4-bromophenyl)-5-methyldibenzo[c,e][1,2]thiazine 5-oxide (6e).

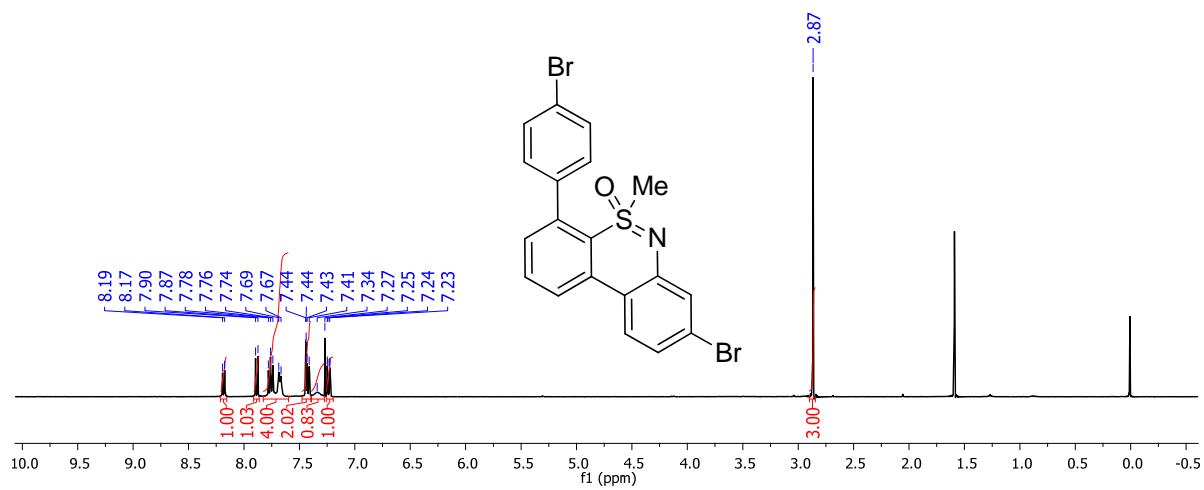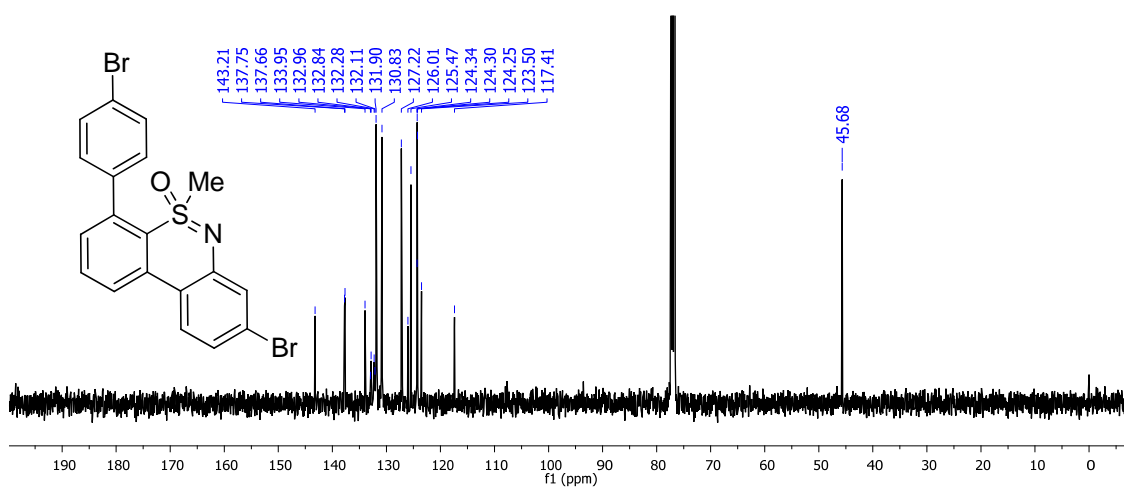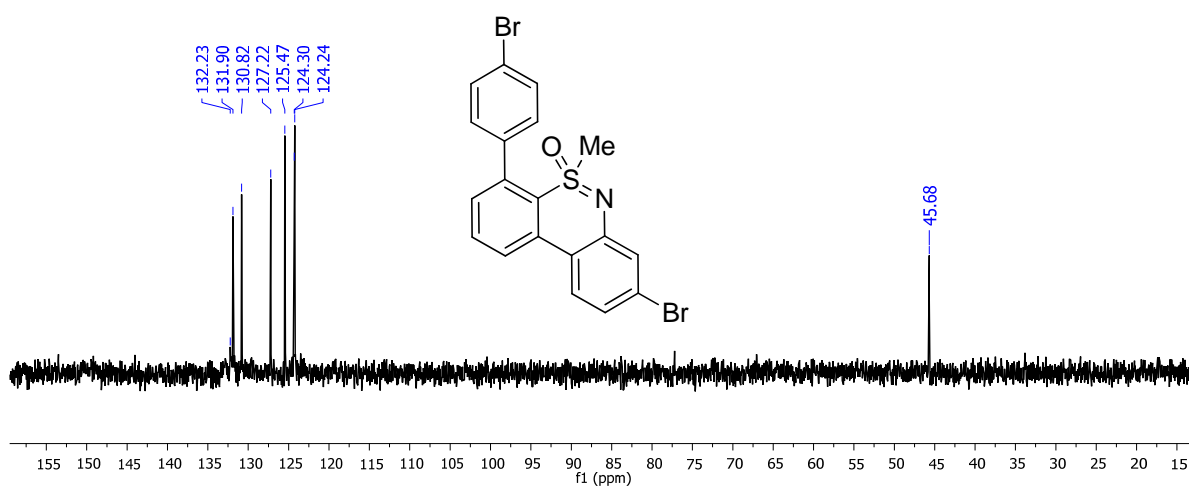



# 8-Chloro-4-(4-chlorophenyl)-5-methyldibenzo[c,e][1,2]thiazine 5-oxide (6f).

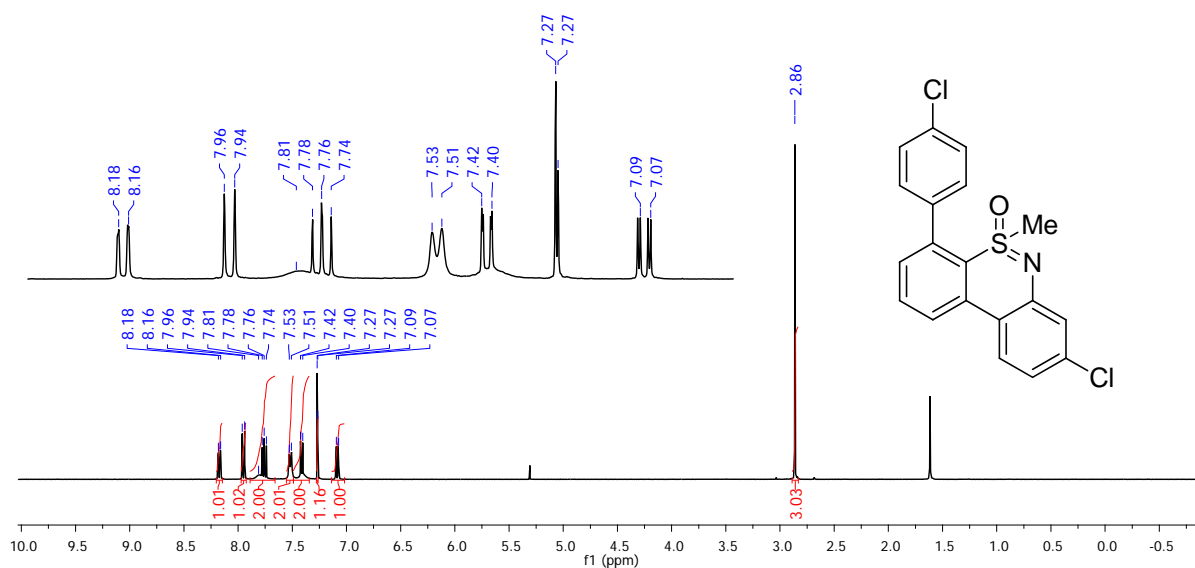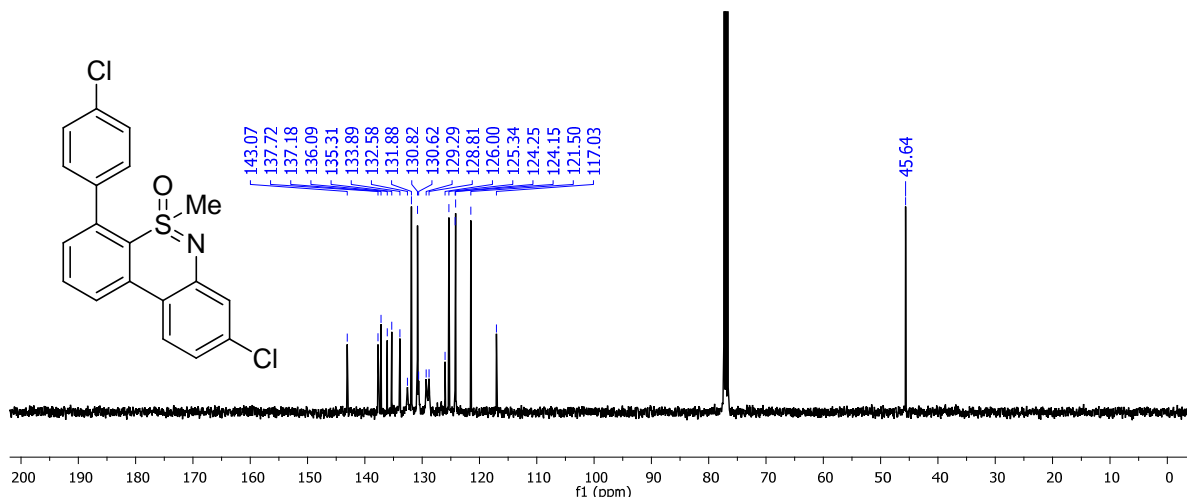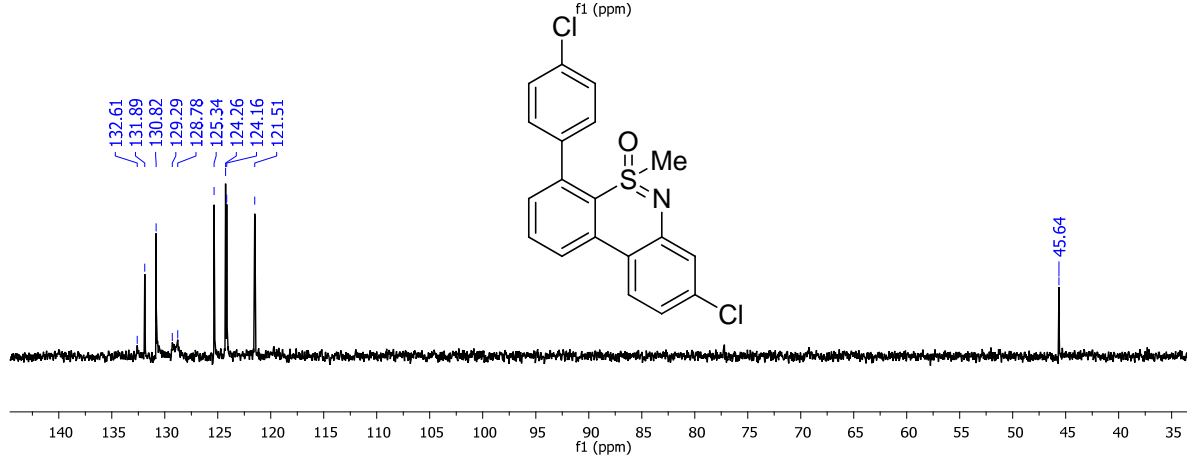

**8-Fluoro-4-(4-fluorophenyl)-5-methyldibenzo[c,e][1,2]thiazine 5-oxide (6g).**

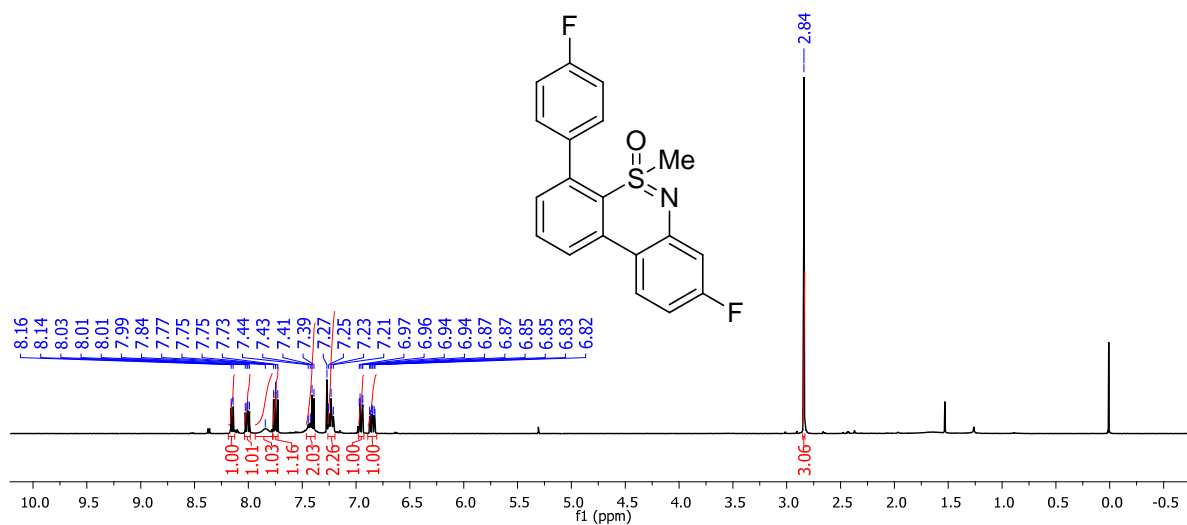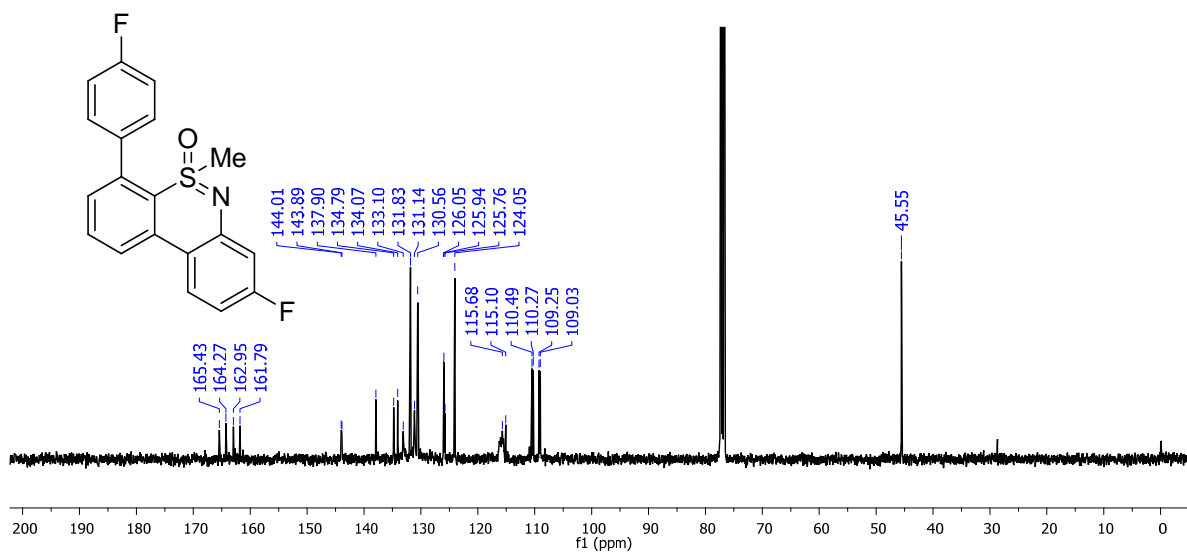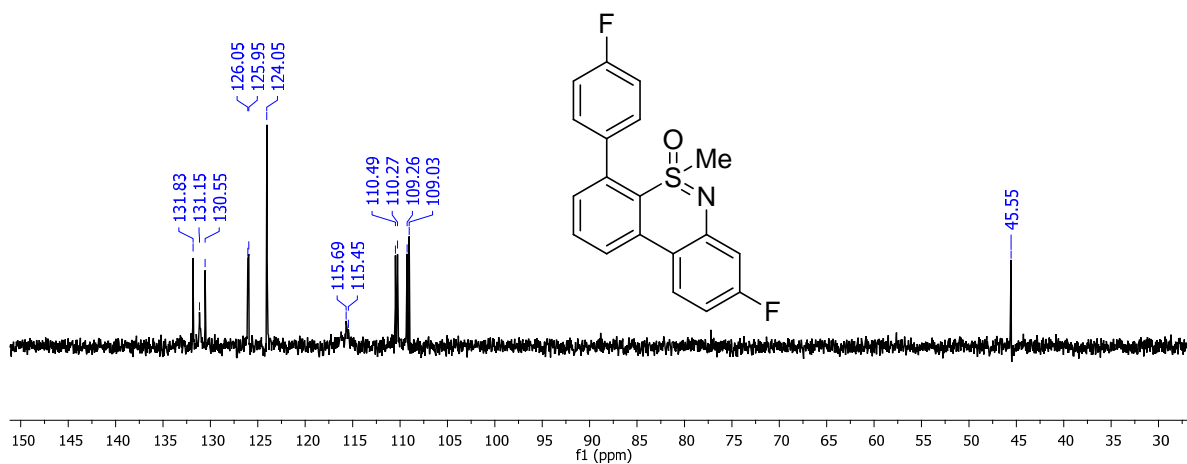

## 2,5-Dimethyl-4-phenyldibenzo[c,e][1,2]thiazine 5-oxide (6h).

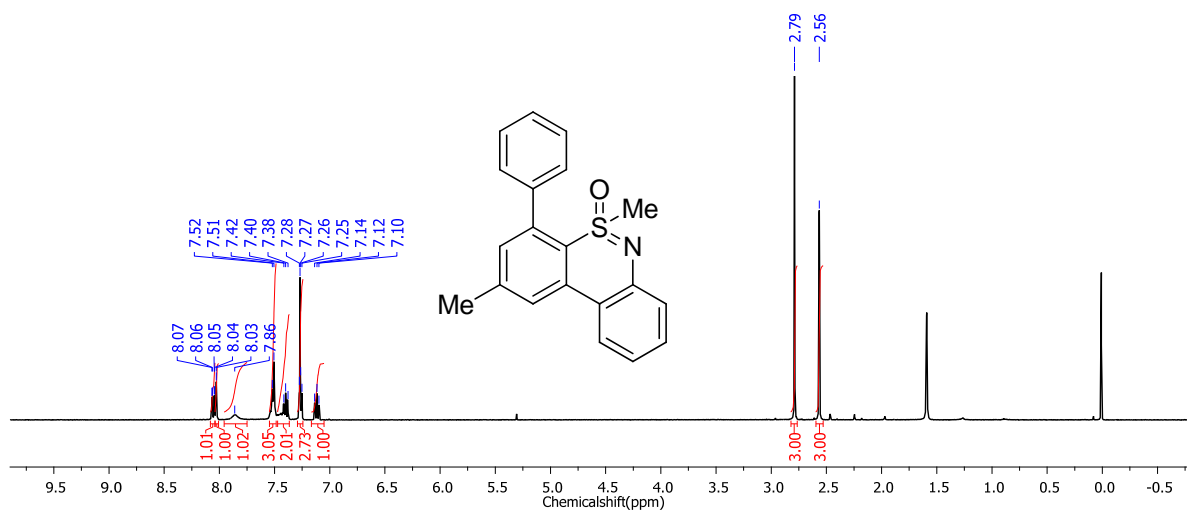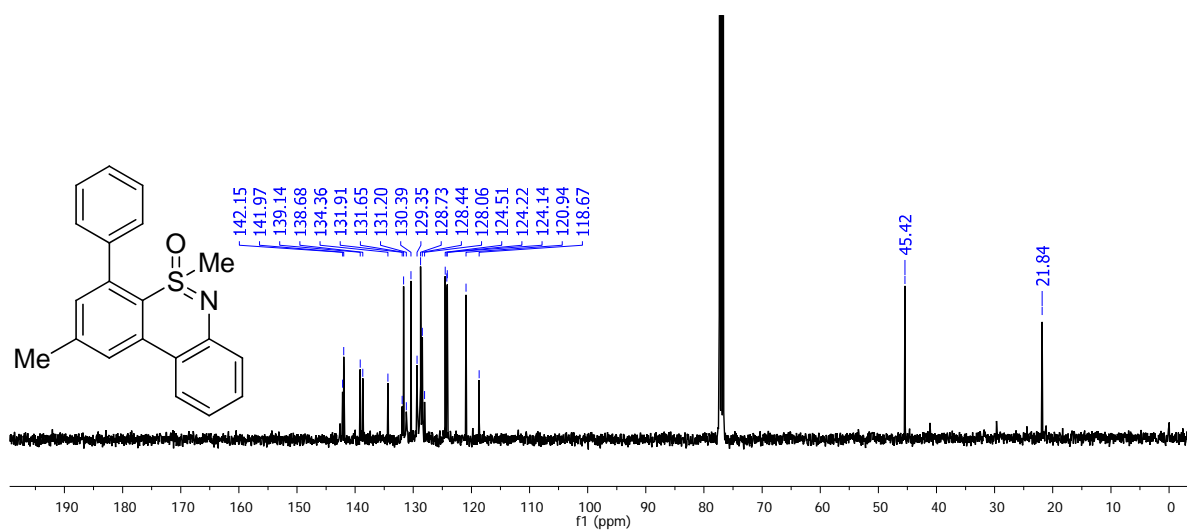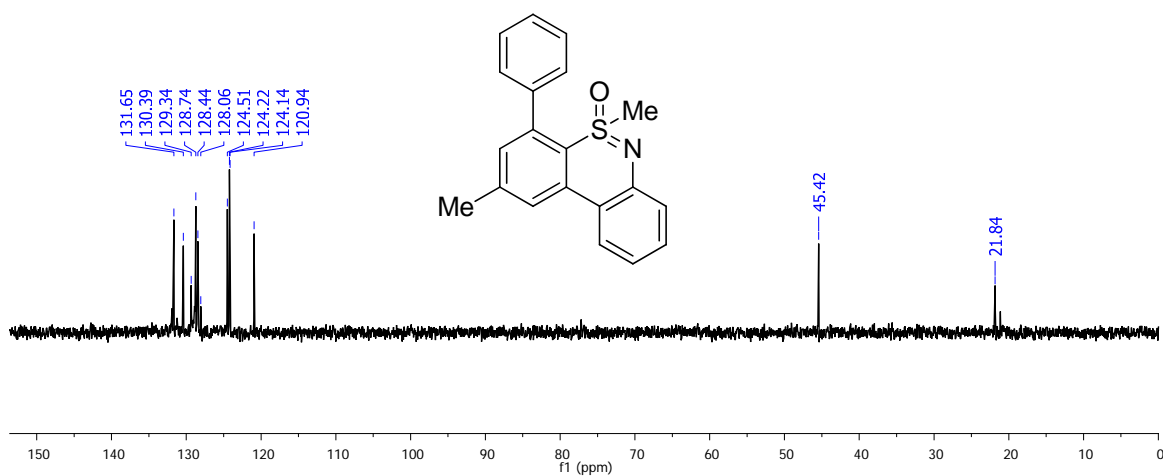

## 2-Bromo-5-methyl-4-phenyldibenzo[c,e][1,2]thiazine 5-oxide (6i).

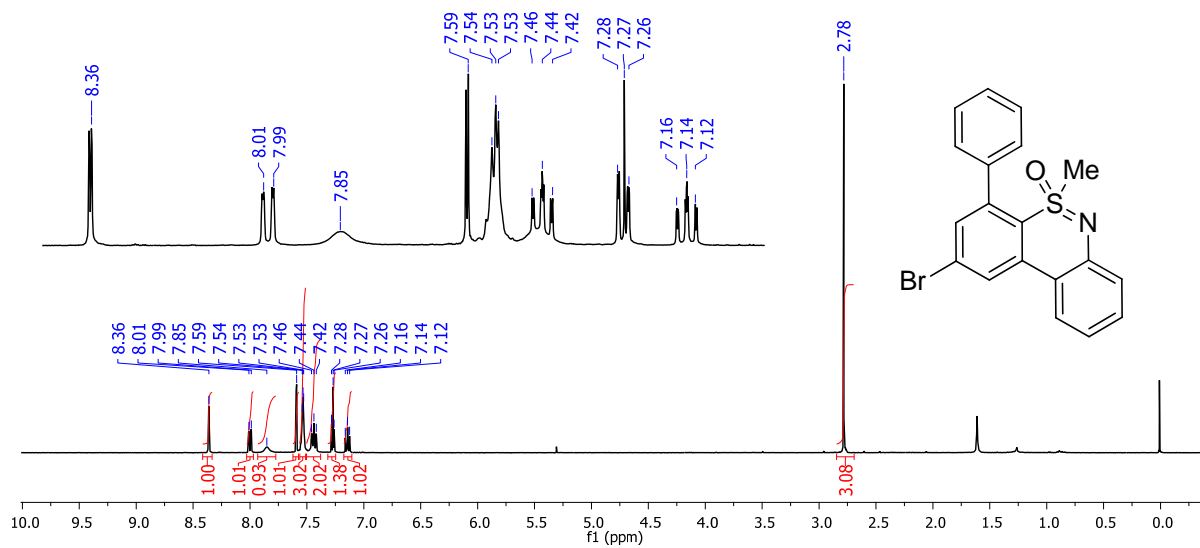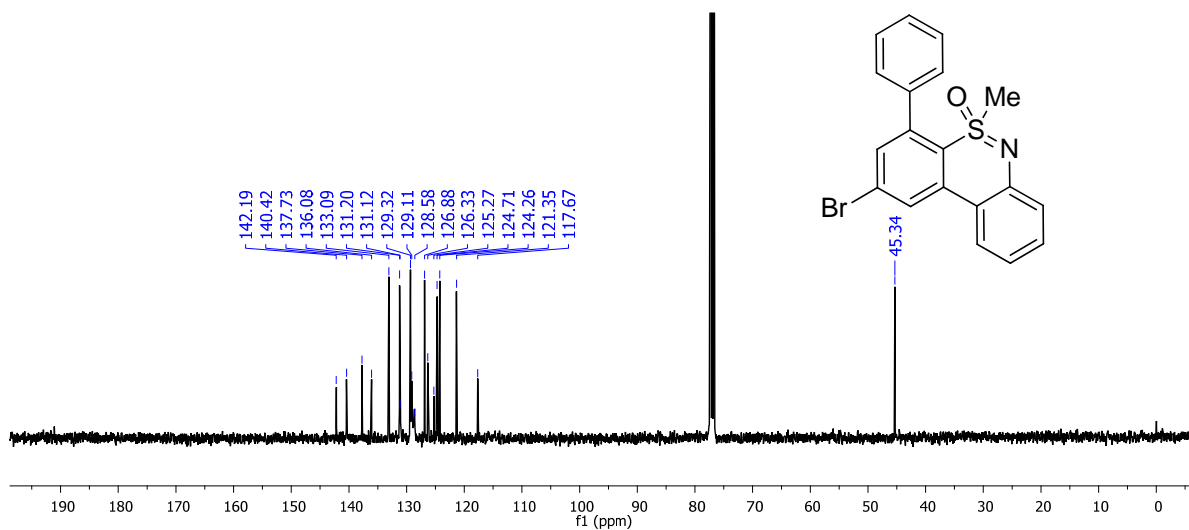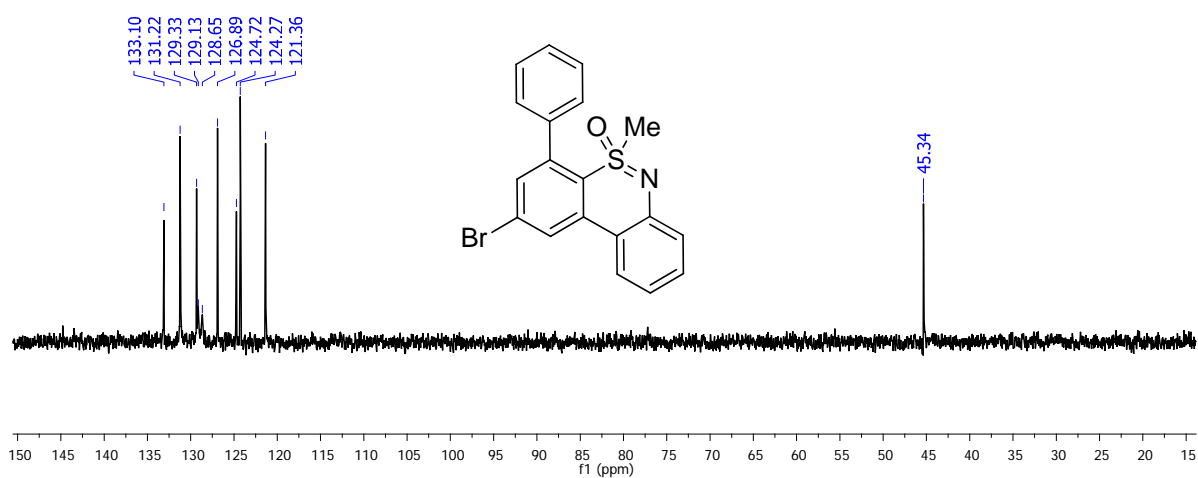

### 5-Methyl-2-nitro-4-phenyldibenzo[*c,e*][1,2]thiazine 5-oxide (6j).

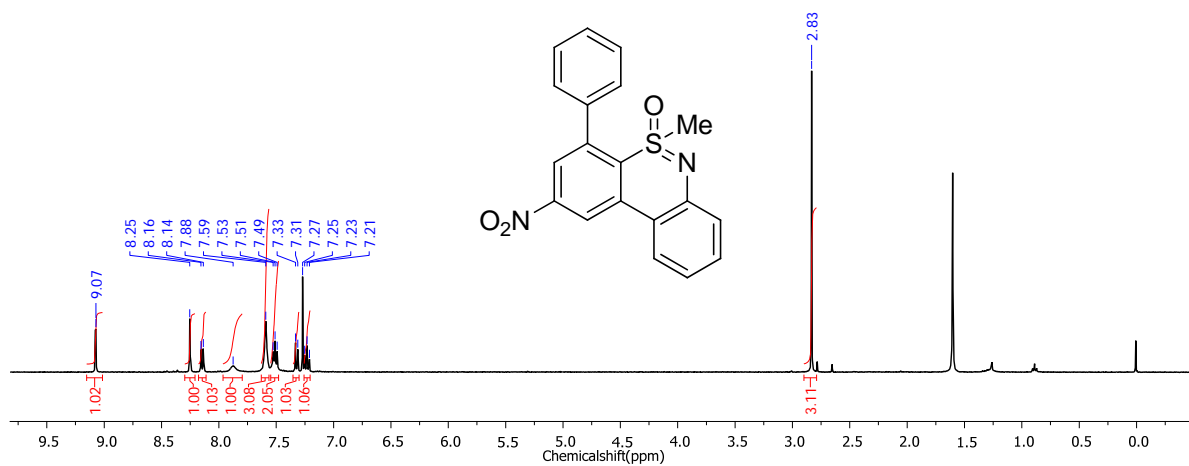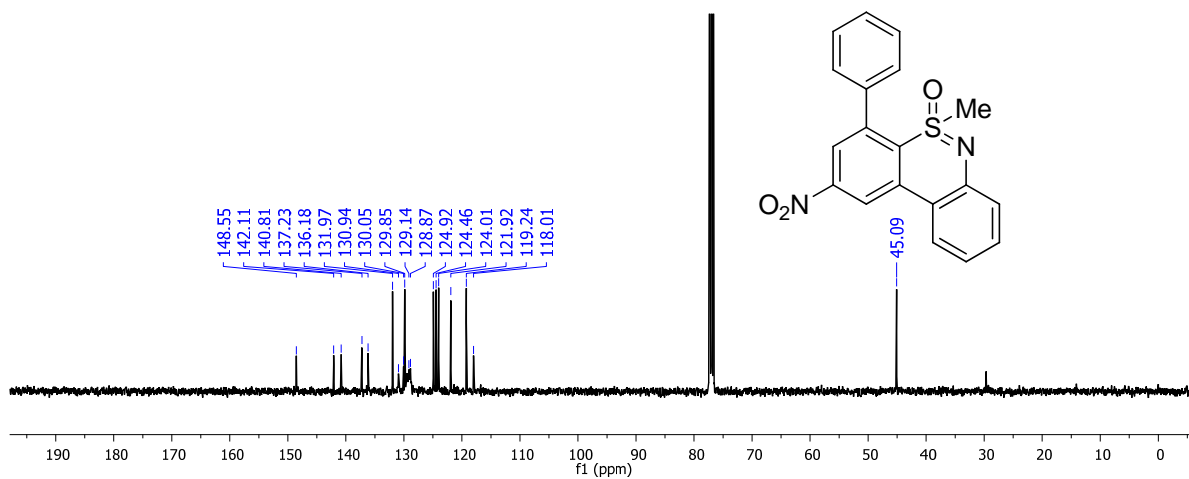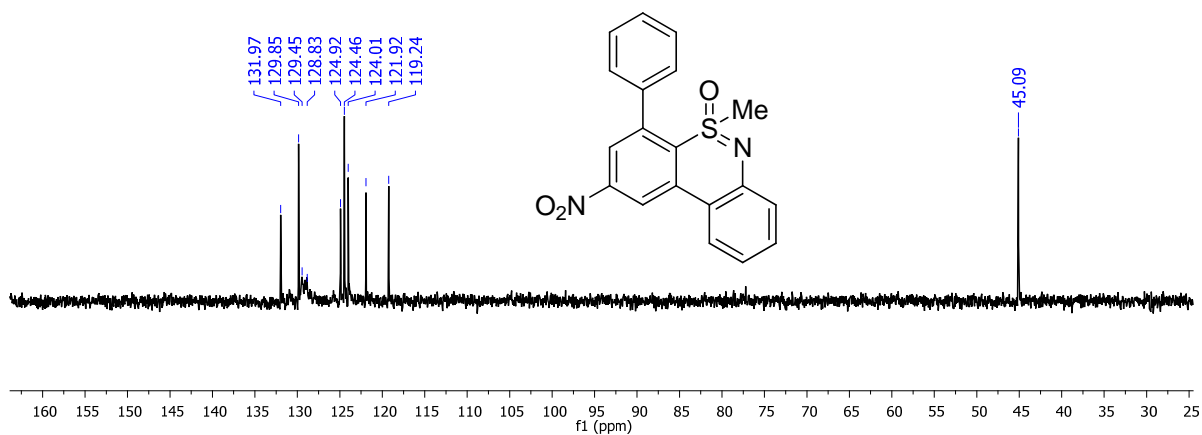

# 5-Ethyl-4-phenyldibenzo[c,e][1,2]thiazine 5-oxide (6k).

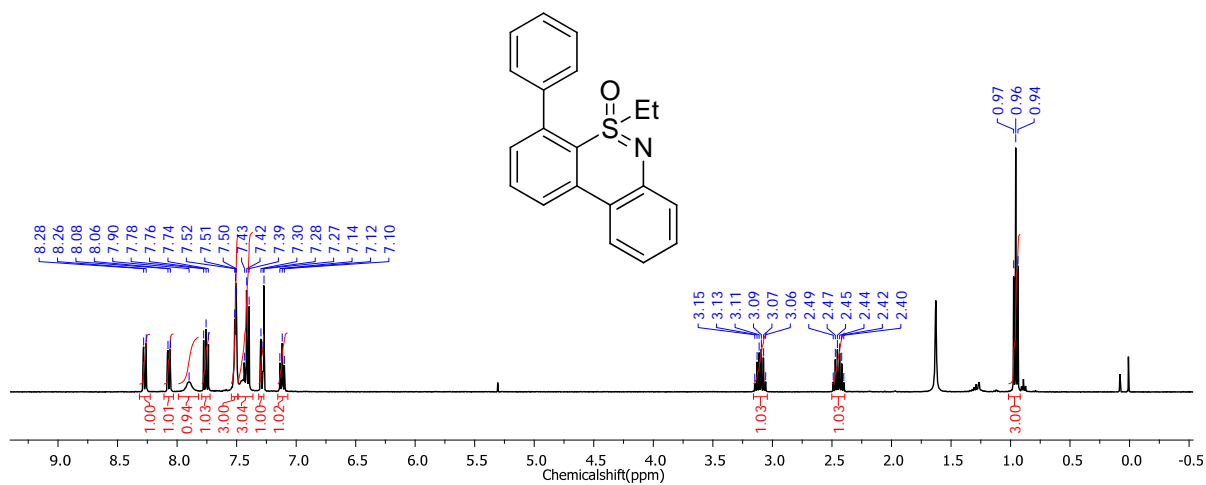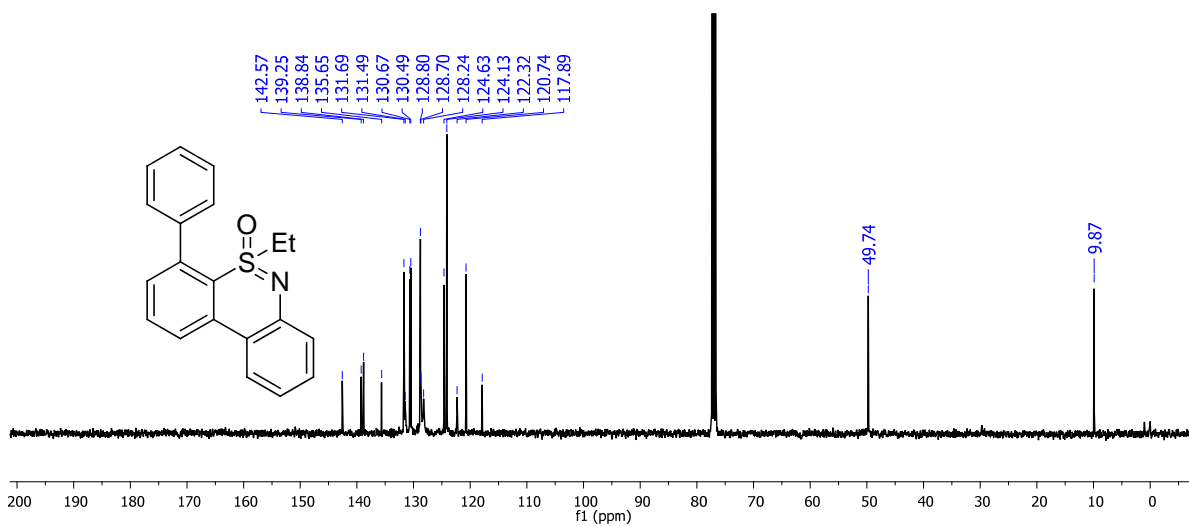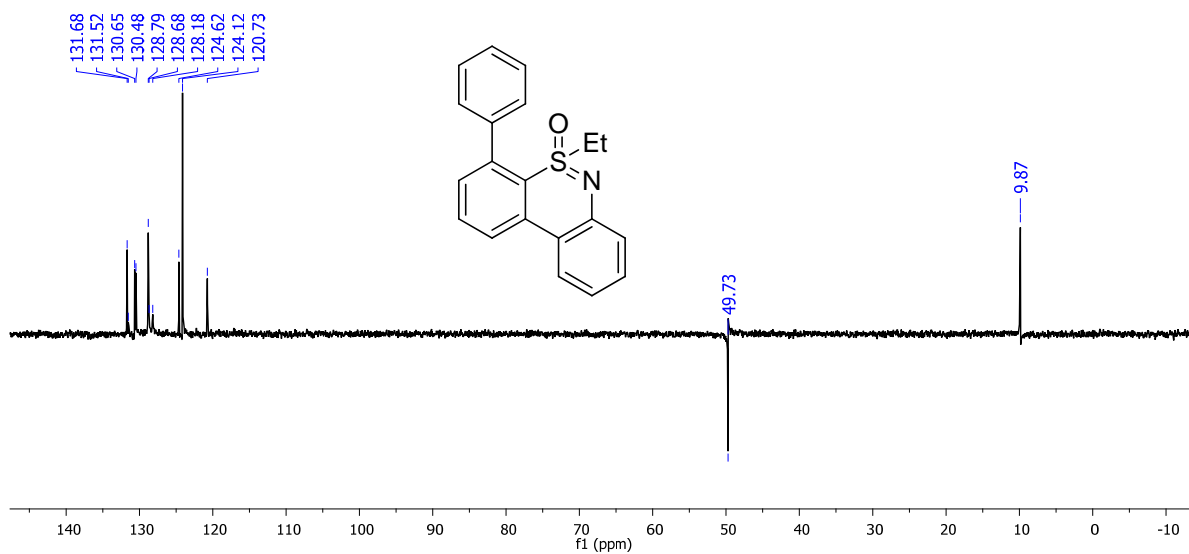

# 4,5-Dimethyldibenzo[c,e][1,2]thiazine 5-oxide (6I).

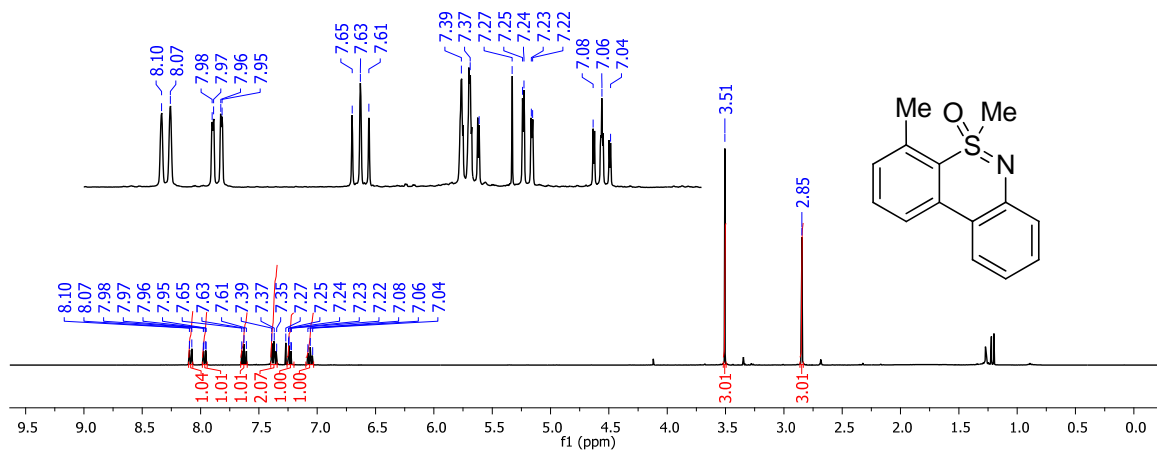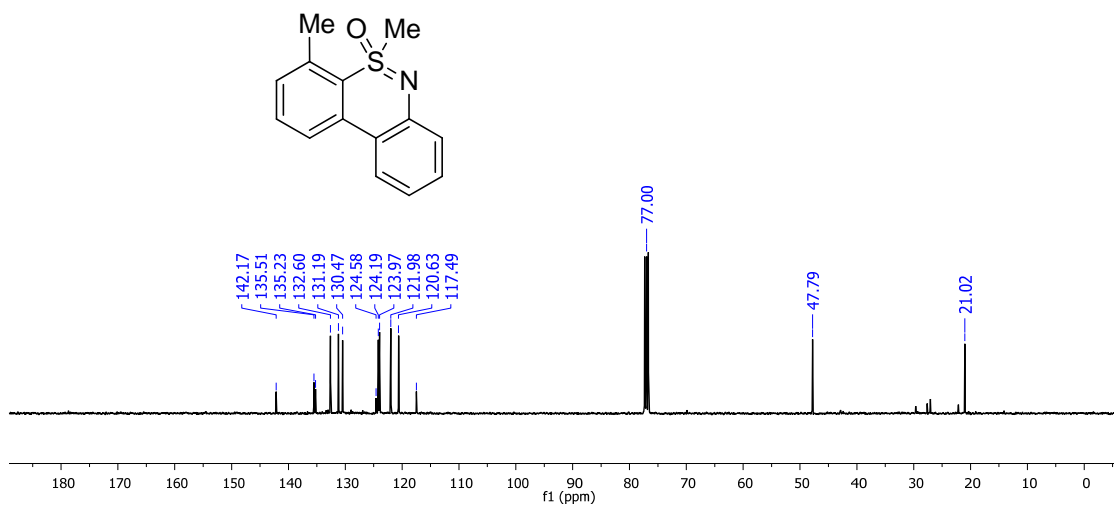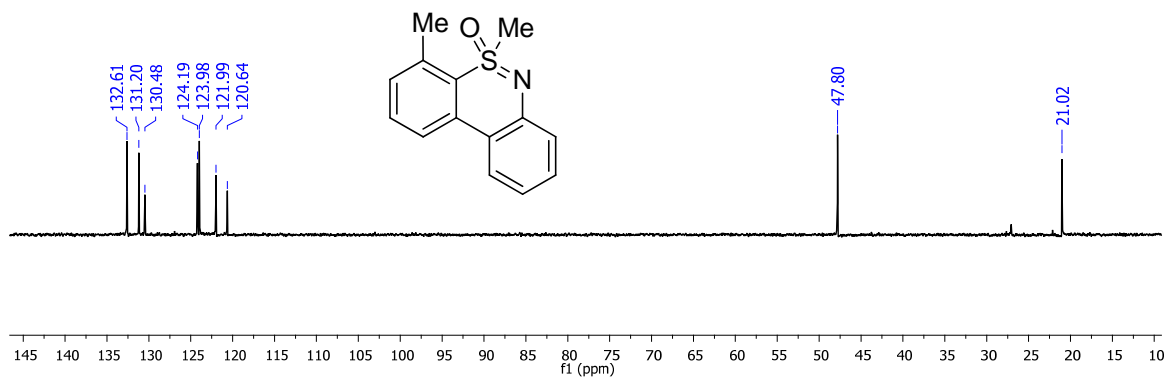

Supplement: c5cc04589d1.pdf [file c5cc04589d1.pdf]
